# Supplementary material for: Understanding the internal heavy-atom effect on thermally activated delayed fluorescence: application of Arrhenius and Marcus theories for spin–orbit coupling analysis
Source: Royal Society of Chemistry journal article supplement (doi:10.1039/d2tc00476c), 2022-01-01
Supplement: d2tc00476c1.pdf [file d2tc00476c1.pdf]

## Supporting information

### UNDERSTANDING THE INTERNAL HEAVY-ATOM EFFECT ON THERMALLY ACTIVATED DELAYED FLUORESCENCE: APPLICATION OF ARRHENIUS AND MARCUS THEORIES FOR SPIN-ORBIT COUPLING ANALYSIS

Michał Mońka,<sup>1</sup> Illia E. Serdiuk<sup>1,\*</sup> Karol Kozakiewicz,<sup>2</sup> Estera Hoffman-Rusin,<sup>1</sup> Jan Szumilas,<sup>1</sup>  
Aleksander Kubicki,<sup>1</sup> Soo Young Park,<sup>3</sup> Piotr Bojarski<sup>1</sup>

<sup>1</sup> Faculty of Mathematics, Physics and Informatics, University of Gdańsk, Wita Stwosza 57, 80-308 Gdańsk, Poland

<sup>2</sup> Faculty of Chemistry, University of Gdańsk, Wita Stwosza 63, 80-308 Gdańsk, Poland

<sup>3</sup> Center for Supramolecular Optoelectronic Materials, Department of Materials Science and Engineering, Seoul National University, 1 Gwanak-ro, Gwanak-gu, Seoul 151-744, Republic of Korea

\*Corresponding author. E-mail: illia.serdiuk@ug.edu.pl, phone + 48 58 523 22 44

## Table of contents

|                    |                                                                                                                                               |
|--------------------|-----------------------------------------------------------------------------------------------------------------------------------------------|
| <b>Section S1:</b> | NMR spectra of target emitters                                                                                                                |
| <b>Section S2:</b> | Detailed discussion on spectral properties                                                                                                    |
| <b>Section S3:</b> | Determination of photophysical parameters                                                                                                     |
| <b>Section S4:</b> | Temperature-dependend time-resolved analysis based on Arrhenius and Marcus theories                                                           |
| <b>Section S5:</b> | Theoretical prediction of ISC and rISC rate constants for the <sup>1</sup> CT- <sup>3</sup> LE transitions                                    |
| <b>Section S6:</b> | Computational details for the prediction rISC rate constant within rotational model via direct <sup>3</sup> CT- <sup>1</sup> CT transition    |
| <b>Section S7:</b> | Computational details for the prediction rISC rate constant within vibrationally model via direct <sup>3</sup> CT- <sup>1</sup> CT transition |
| <b>Section S8:</b> | The assumptions towards rotational-vibronic model of direct <sup>3</sup> CT- <sup>1</sup> CT transition                                       |
| <b>Section S9:</b> | Molecular electronic orbitals                                                                                                                 |

## Section S1. NMR spectra of target emitters

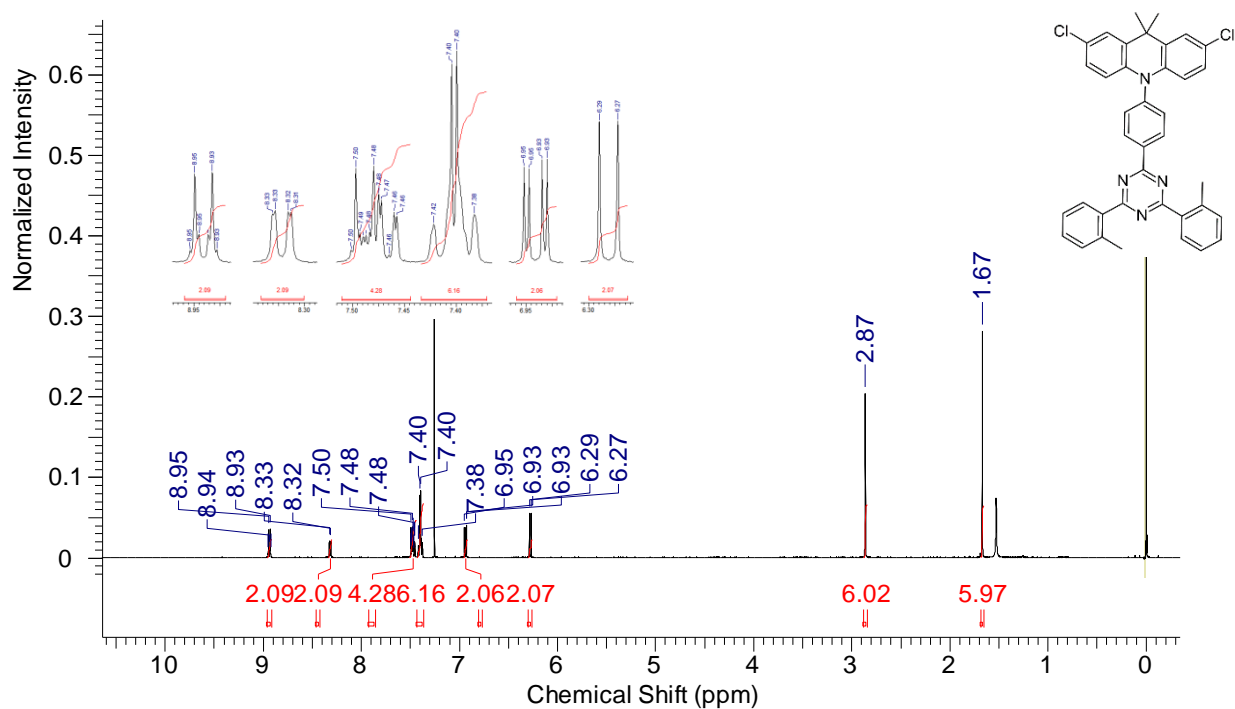

Figure S1. <sup>1</sup>H NMR spectrum of diCl

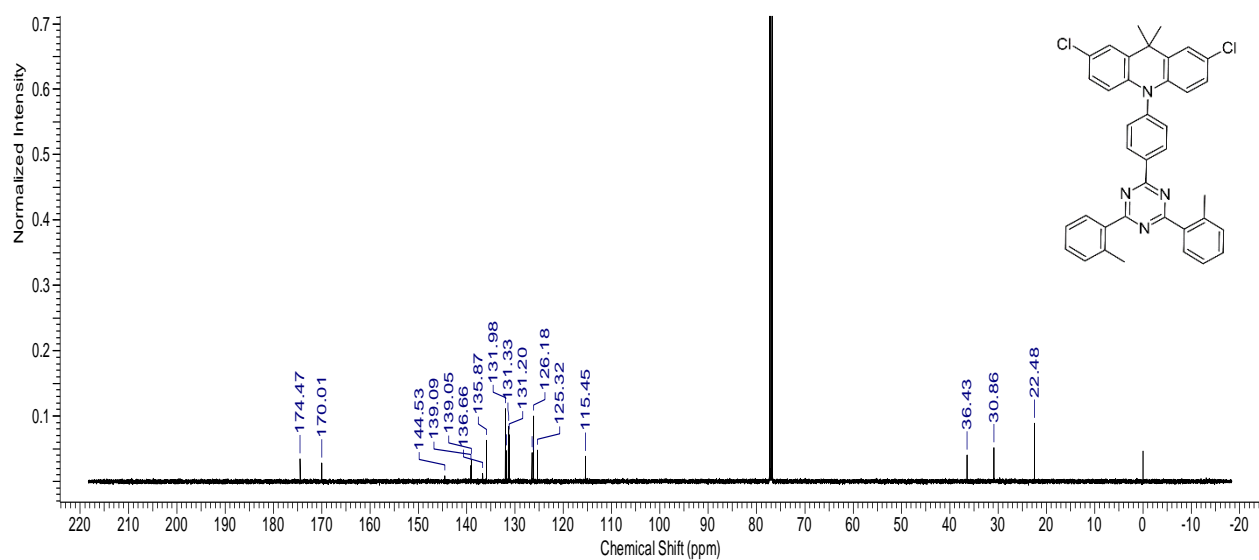

Figure S2. <sup>13</sup>C NMR spectrum of diCl

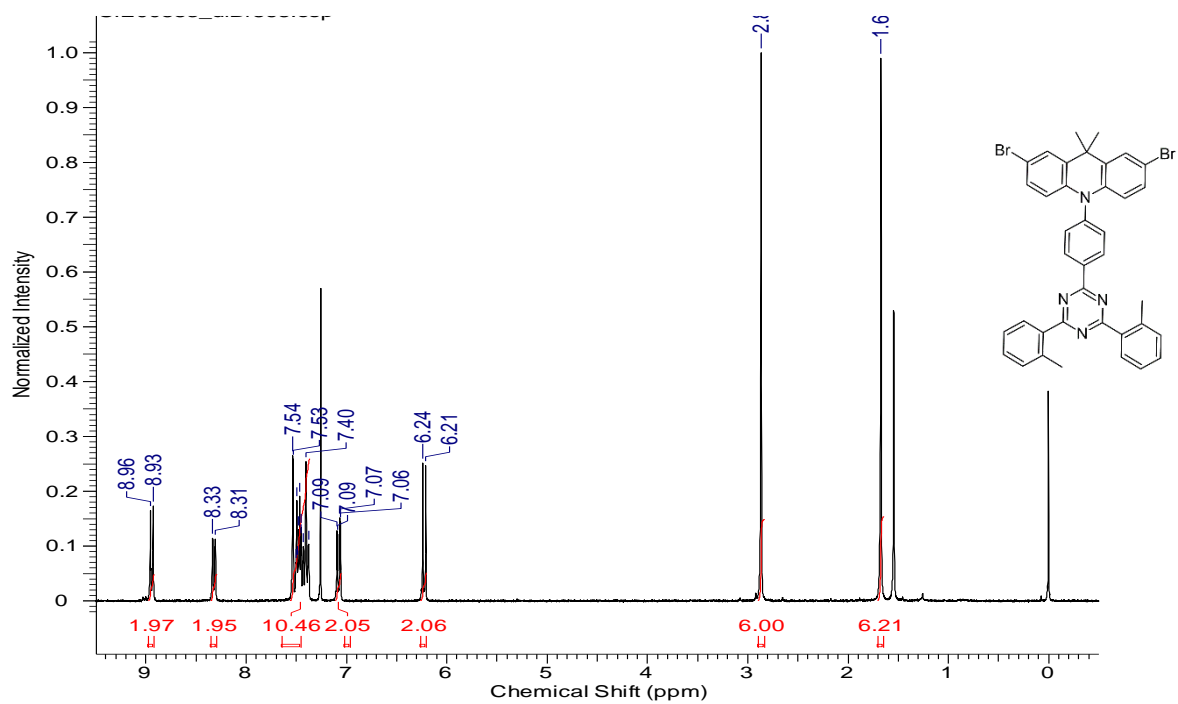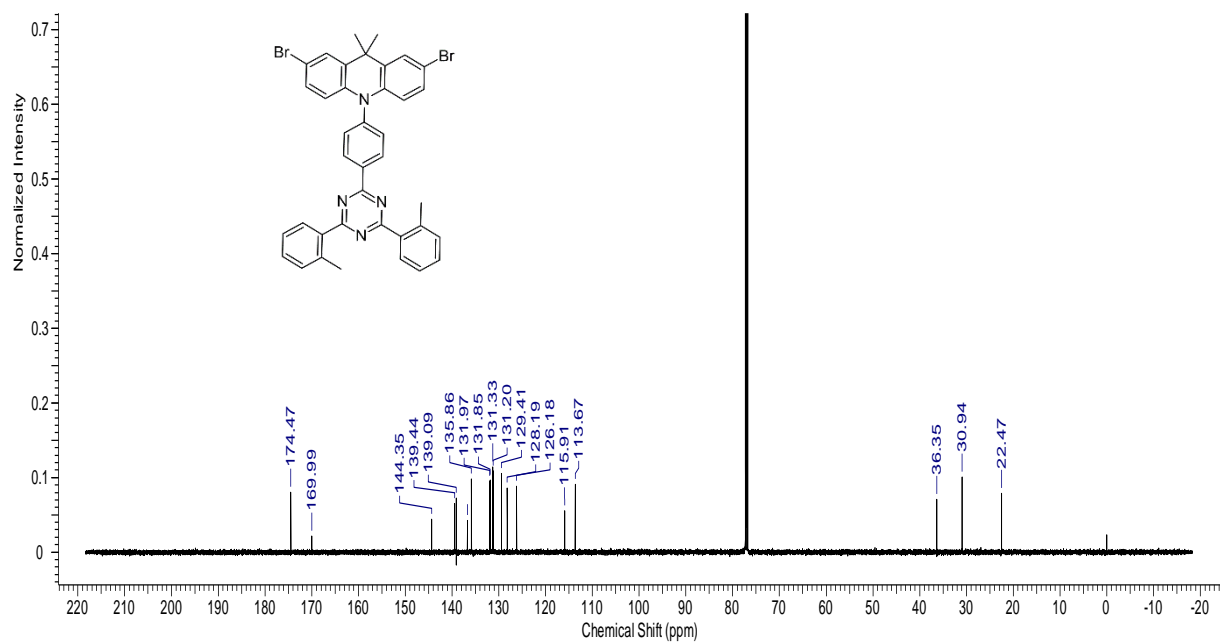

## Section S2. Detailed discussion on spectral properties

*Analysis of the nature of lowest excited electronic states on the basis of steady-state measurements.* In nonpolar ZNX films at room temperature (RT), all three emitters (**H**, **diCl**, **diBr**) show vibronically-structured emission band with a maximum localized at 465–467 nm (**Figure 1C**). The onsets of fluorescence spectra ( $\lambda_{\text{onset}}$ , **Figures S6A-C**) were determined to be around 423, 418 and 421 nm for **H**, **diCl**, and **diBr**, respectively, which gives the  $S_1$ -state energies of 2.93, 2.97 and 2.95 eV, respectively (**Table S1**). In more polar PMMA, the emission becomes broad and structureless, and shifts to 492–499 nm range. The onsets of fluorescence in PMMA were estimated to be around  $\lambda_{\text{onset}} = 430, 427$  and 428 nm for **H**, **diCl**, and **diBr** respectively (**Figures S6D-F**), which gives the energy levels of  $^1\text{CT}$  states at 2.88, 2.90 and 2.89 eV. Such positive solvatochromism typical for most of TADF emitters arises from the charge transfer (CT) character of the  $S_1$ -state [S1].

To reveal the nature and the energy of the lowest triplet excited states the phosphorescence measurements at low temperature were performed. As shown in **Figures S6A-C**, the phosphorescence spectrum of **H** in ZNX is red-shifted and has different shape as compared to that of fluorescence, with onset around  $\lambda_{\text{onset}} = 437$  nm, which gives the energy level at 2.84 eV. The presented phosphorescence spectrum profile perfectly matches the shape of emission of the isolated acceptor fragment that was measured separately, as depicted in **Figure S6G**. Taking into account the previous studies of similar compound **DMAC-TRZ** [S2] our results indicate that the lowest triplet excited state of **H** in ZNX is of the localized nature ( $^3\text{LE}_A$ ) originating from the acceptor fragment. The same conclusion was made for the **diCl** and **diBr** derivatives, as no significant differences in the phosphorescence spectra of **diCl** and **diBr** in ZNX were observed. In fact, as the halogens were introduced into donor fragment, they were not expected to affect the acceptor-localized  $^3\text{LE}_A$  state. With respect to this, the energy gap  $\Delta E_{1\text{CT}-3\text{LE}}$  between lowest excited singlet ( $^1\text{CT}$ ) and triplet ( $^3\text{LE}_A$ ) states in ZNX was estimated to be of 94, 133 and 114 meV for **H**, **diCl** and **diBr**, respectively (**Table S1**).

In more polar PMMA films, the phosphorescence spectrum of **H** broadens, becomes structureless and red-shifted as compared to the one measured in ZNX (**Figure S6D**). It should be noted, that in PMMA at 10K, to distinguish phosphorescence from the  $^1\text{CT}$ -fluorescence, careful

analysis of TRES was conducted. As mentioned above, the specific feature of the  $^1\text{CT}$ -fluorescence in DF region is its gradual blue-shift with the delay time. In PMMA films at 10K, the emission does not shift after the 50 $\mu\text{s}$  delay time (**Figure S8**). Its onset value in **H** falls around 443 nm, which is 0.04 eV below the  $^3\text{LE}_\text{A}$  state. Such observation indicates, that in PMMA phosphorescence occurs from the triplet charge-transfer ( $^3\text{CT}$ ) state, energy of which is estimated around 2.80 eV. Similar observations for **diCl** and **diBr** gave the  $^3\text{CT}$  levels of 2.81 eV (onset at 441 nm, **Figures S6E** and **S1F**). Taking into account these energies, the values of energy gap between lowest  $^1\text{CT}$  and  $^3\text{CT}$  states ( $\Delta E_{1\text{CT}-3\text{CT}}$ ) were estimated as 85, 95 and 86 meV, as summarized in **Table 1**. Such relatively high values of  $\Delta E_{1\text{CT}-3\text{CT}}$  are explained further.

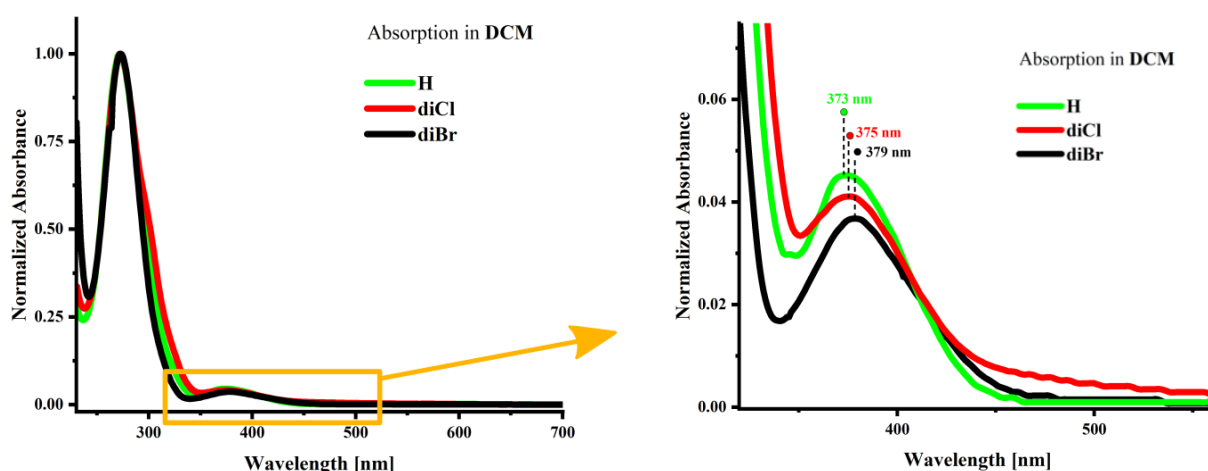

**Figure S5.** The absorption spectra of the investigated compounds measured in dichloromethane (DCM) solutions.

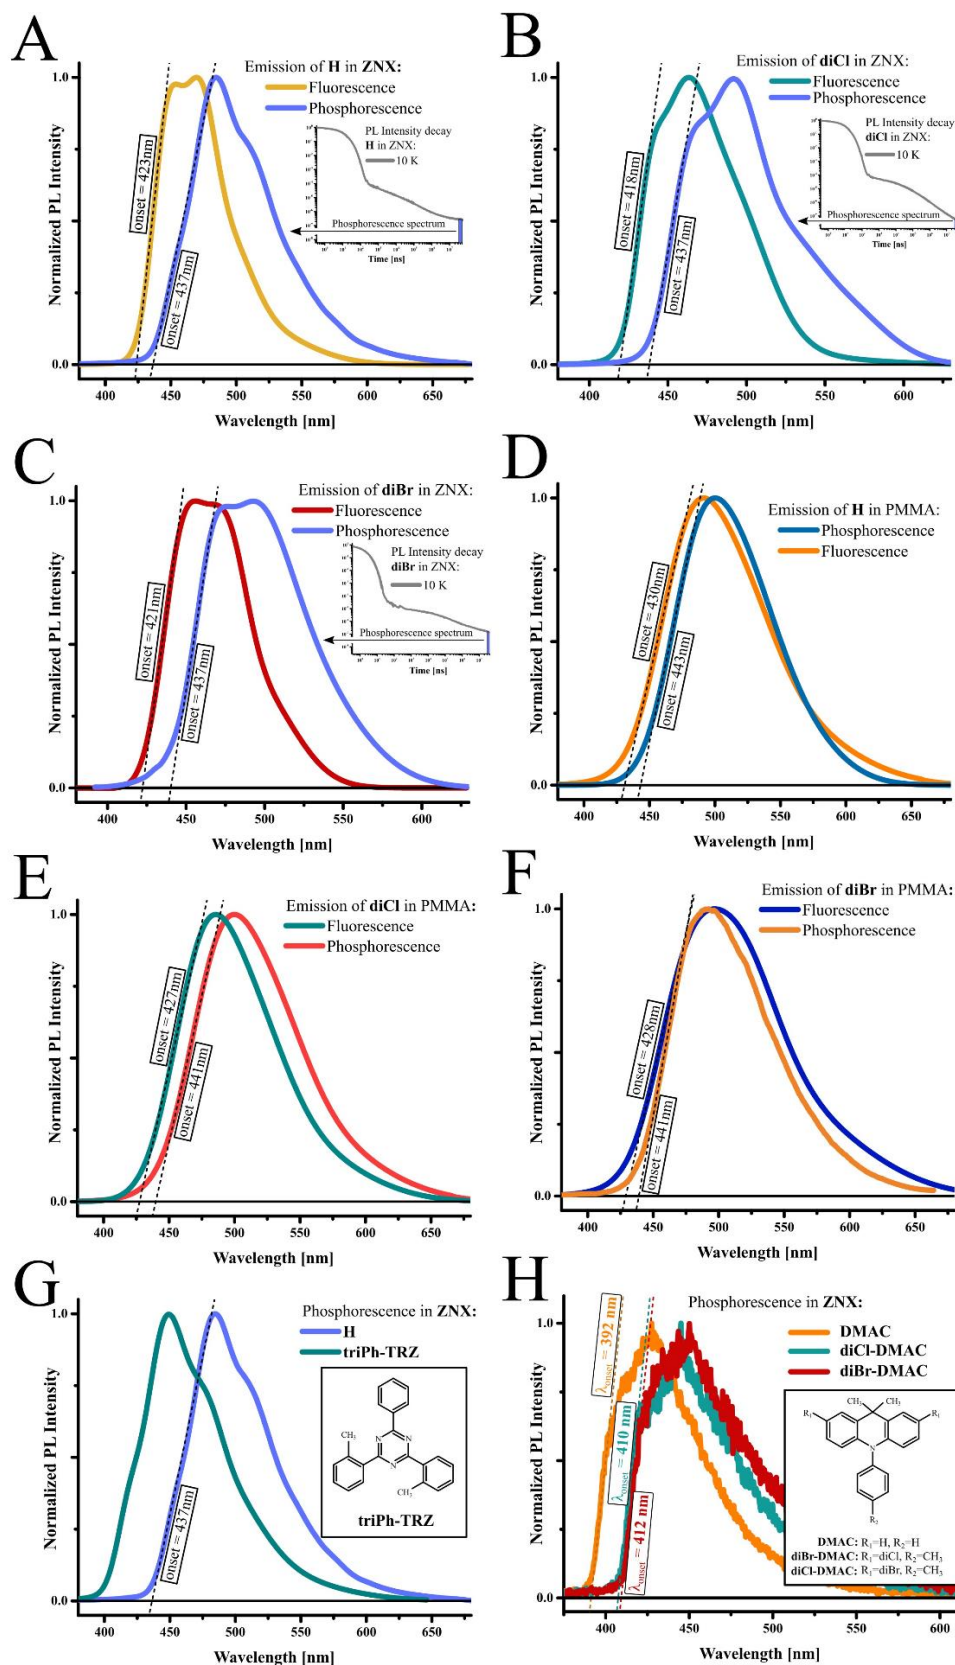

**Figure S6.** Steady-state fluorescence and phosphorescence spectra of **H**, **diCl** and **diBr** in ZNX (A, B, C, respectively) and in PMMA (D, E, F) with determined onsets. Fluorescence spectra were measured at room temperature in aerated conditions upon excitation  $\lambda_{\text{exc}}=370$  nm. Phosphorescence spectra of isolated fragments: acceptor (G) and donors of **H**, **diCl** and **diBr** (H) were measured at 10 K with 30ms time delay under excitation  $\lambda_{\text{exc}}=320$  nm.

**Table S1.** Photophysical parameters.

| cmpd        | medium | PLQY <sup>a</sup> | Fluorescence <sup>1</sup> CT |                             |                             | Phosphorescence <sup>3</sup> LE(A) |                             |                             | Phosphorescence <sup>3</sup> CT |                             |                             | Phosphorescence <sup>3</sup> LE(D) |                             |                             | $\Delta E_{1CT-3LE(A)}$ <sup>e</sup> | $\Delta E_{1CT-3CT}$ <sup>e</sup> | $\Delta E_{1CT-3LE(D)}$ <sup>e</sup> |
|-------------|--------|-------------------|------------------------------|-----------------------------|-----------------------------|------------------------------------|-----------------------------|-----------------------------|---------------------------------|-----------------------------|-----------------------------|------------------------------------|-----------------------------|-----------------------------|--------------------------------------|-----------------------------------|--------------------------------------|
|             |        |                   | [%]                          | $\lambda_{onset}^b$<br>[nm] | Energy <sup>c</sup><br>[eV] | $\lambda_{max}^d$<br>[nm]          | $\lambda_{onset}^b$<br>[nm] | Energy <sup>c</sup><br>[eV] | $\lambda_{max}^d$<br>[nm]       | $\lambda_{onset}^b$<br>[nm] | Energy <sup>c</sup><br>[eV] | $\lambda_{max}^d$<br>[nm]          | $\lambda_{onset}^b$<br>[nm] | Energy <sup>c</sup><br>[eV] | $\lambda_{max}^d$<br>[nm]            | [meV]                             | [meV]                                |
| <b>H</b>    | ZNX    | 60                | 423                          | 2.93                        | 465                         | 437                                | 2.84                        | 487                         | -                               | -                           | -                           | 392                                | 3.16                        | 426                         | 94                                   | -                                 | -230                                 |
| <b>diCl</b> |        | 75                | 418                          | 2.97                        | 462                         | 437                                | 2.84                        | 489                         | -                               | -                           | -                           | 410                                | 3.02                        | 447                         | 133                                  | -                                 | -55                                  |
| <b>diBr</b> |        | 12                | 421                          | 2.95                        | 467                         | 437                                | 2.84                        | 490                         | -                               | -                           | -                           | 412                                | 3.01                        | 448                         | 114                                  | -                                 | -55                                  |
| <b>H</b>    | PMMA   | 99                | 430                          | 2.88                        | 498                         | -                                  | -                           | -                           | 443                             | 2.80                        | 498                         | -                                  | -                           | -                           | 46                                   | 85                                | -278                                 |
| <b>diCl</b> |        | 85                | 427                          | 2.90                        | 492                         | -                                  | -                           | -                           | 441                             | 2.81                        | 494                         | -                                  | -                           | -                           | 72                                   | 95                                | -116                                 |
| <b>diBr</b> |        | 21                | 428                          | 2.89                        | 499                         | -                                  | -                           | -                           | 441                             | 2.81                        | 500                         | -                                  | -                           | -                           | 60                                   | 86                                | -109                                 |

<sup>a</sup> - PLQY was measured at 298K using integrating sphere under oxygen atmosphere. The values presented in the table are corrected for vacuum conditions according to proportional relationship:  $PLQY = PLQY_{air} \times (DecArea_{vac}/DecArea_{air})$ , where  $PLQY_{air}$  is value obtained under oxygen atmosphere,  $DecArea_{vac}$  and  $DecArea_{air}$  are total areas under PL intensity decays measured in vacuum and under oxygen atmosphere, respectively (**Figure S7A-F**);

<sup>b</sup> - onsets determined experimentally from PL spectra (see **Figure S6A-F** for <sup>1</sup>CT, **Figures S6A-C** and **S6G** for <sup>3</sup>LE(A), **Figure S6H** for <sup>3</sup>LE(D) and **Figure S6D-F** for <sup>3</sup>CT-state);

<sup>c</sup> - energies of respective excited states calculated from relation:  $E = 1240/\lambda_{onset}$ ;

<sup>d</sup> – photoluminescence maxima (see **Figure S6** for <sup>1</sup>CT and <sup>3</sup>LE(A), **Figures S6H** for <sup>3</sup>LE(D) and **Figures S6D-F** for <sup>3</sup>CT-state);

<sup>e</sup> - energy gap determined from the difference of respective onsets of PL spectra:  $\Delta E_{1-2} = (1240/\lambda_{onset1} - 1240/\lambda_{onset2})$ .

As can be seen in **Figure S7**, the PL decay for each of studied emitters contains two well-separated areas in nano- and microsecond regimes corresponding to the prompt and delayed emission. The PL intensity decay profiles measured in the presence of oxygen differ from those recorded in the vacuum due to quenching by molecular oxygen, which confirms that TADF is mediated by triplet state(s).

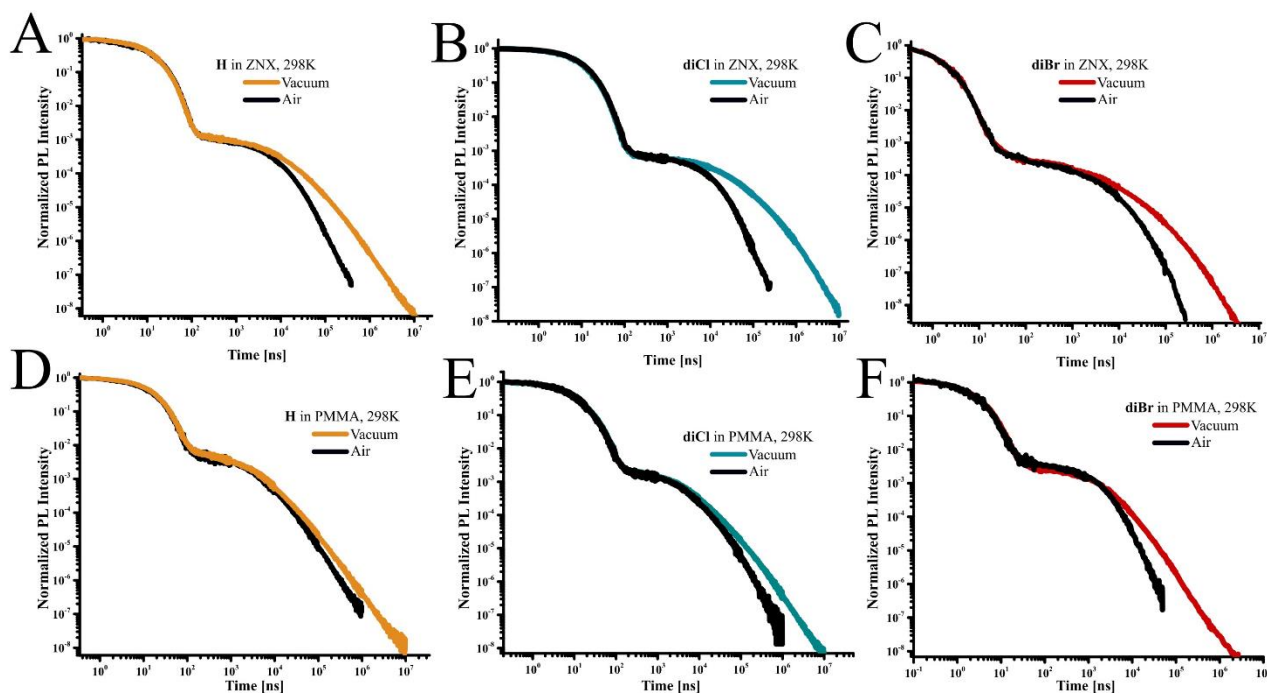

**Figure S7.** Time-resolved PL measurements of studied compounds dispersed in ZNX (A-C) and PMMA (D-F) in the presence of oxygen and in vacuum at 298 K. Excitation wavelength  $\lambda_{\text{exc}}=370$  nm.

To verify whether the delayed emission originates from the  $^1\text{CT}$ -state, detailed time-dependent analysis of PL spectra was carried out (**Figures S8A** and **S9A**). Through the entire timescale of PL spectra of each emitter, all the collected spectra have roughly similar shape and maximum (**Figures S8B-D**, **S9B-D**). Therefore, the fast component can be identified as prompt fluorescence (PF), occurring from the directly excited  $^1\text{CT}$ -state, whilst the slow one is due to the delayed fluorescence (DF), where emission from the  $^1\text{CT}$ -state is preceded by ISC and rISC.

For time-resolved emission spectra (TRES) in PF region over the first 100 ns, the emission maximum red-shifts from 452 to 463 nm in ZNX and 473 to 497 nm in PMMA (**Figures S8-S11**). In

the DF regime starting from 1  $\mu$ s, TRES undergo the red shift from 455 nm to 481 nm. Such spectral behavior can be explained by the distribution of  $^1\text{CT}$  states due to the coexistence of different emitter conformations. As suggested in previous reports[S2, S3], the most crucial conformers differ by the dihedral angle between donor and acceptor units ( $\theta$ , **Figures 1B and 1D**, main text). At the very early stages of PF, the blue-shifted fluorescence spectrum originates from the conformers with the most deviated  $\theta$ -value from the optimal  $90^\circ$ . The deviation from orthogonality leads to the increased overlap of molecular orbitals (MOs) involved in the CT transition, and thus better conjugation of donor and acceptor fragments. For this reason, such conformers have higher energies of  $^1\text{CT}$  states and higher value of  $S_1$ - $S_0$  oscillator strength, which enables relatively fast emission. As  $\theta$  approaches to orthogonal, the  $^1\text{CT}$  state becomes more stabilized due to decreased conjugation between D and A, which leads to red-shift of emission and lower  $S_1$ - $S_0$  oscillator strengths. Such conformers emit at the late PF. The opposite behavior is observed for the DF region. The red-shifted emission is responsible for the early-DF, whilst in the late-DF blue shift is observed. As the most orthogonal conformers have the smallest energy gap between singlet and triplet state  $\Delta E_{\text{ST}}$ , which according to Marcus-Hush equation (eq. 2 in main text) leads to the highest rISC rates, their red-shifted DF appears first. Consequently, as the  $\theta$ -deviation increases,  $\Delta E_{\text{ST}}$  increases too, rISC becomes slower and the DF spectrum gradually shifts to shorter wavelengths.

The distribution of  $^1\text{CT}$ -state energy and relatively constant energy of the  $^3\text{CT}$ -state (**Figure S12A-C**), explains relatively high values of  $\Delta E_{1\text{CT}-3\text{CT}}$  mentioned above.

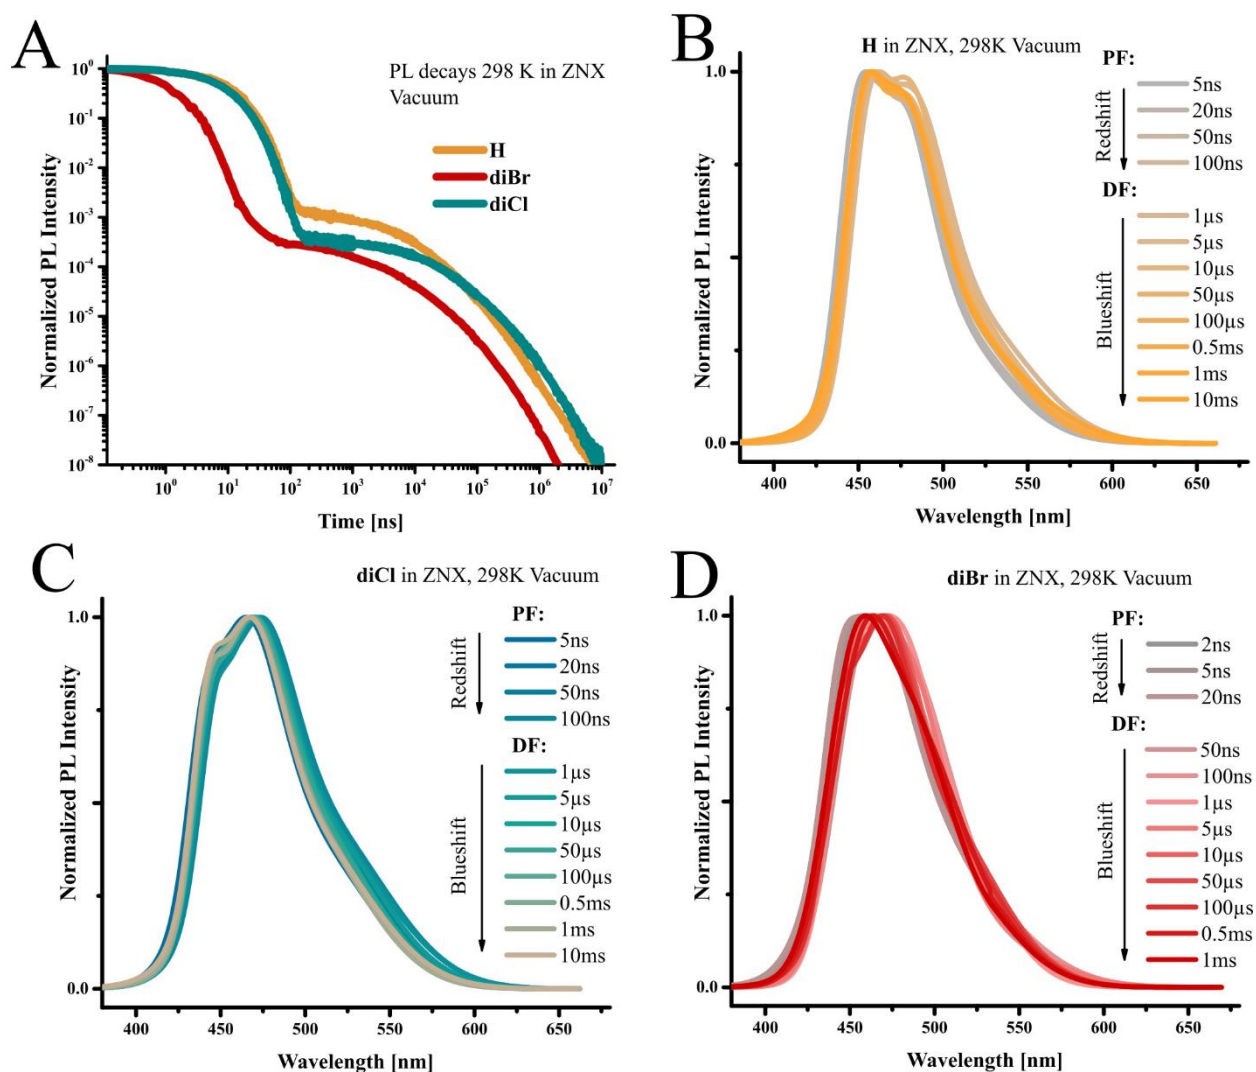

**Figure S8.** PL intensity decay profiles of **H**, **diCl**, and **diBr** in ZNX (A) with PL spectra taken at different time delays (B-D). Excitation wavelength  $\lambda_{\text{exc}}=370$  nm.

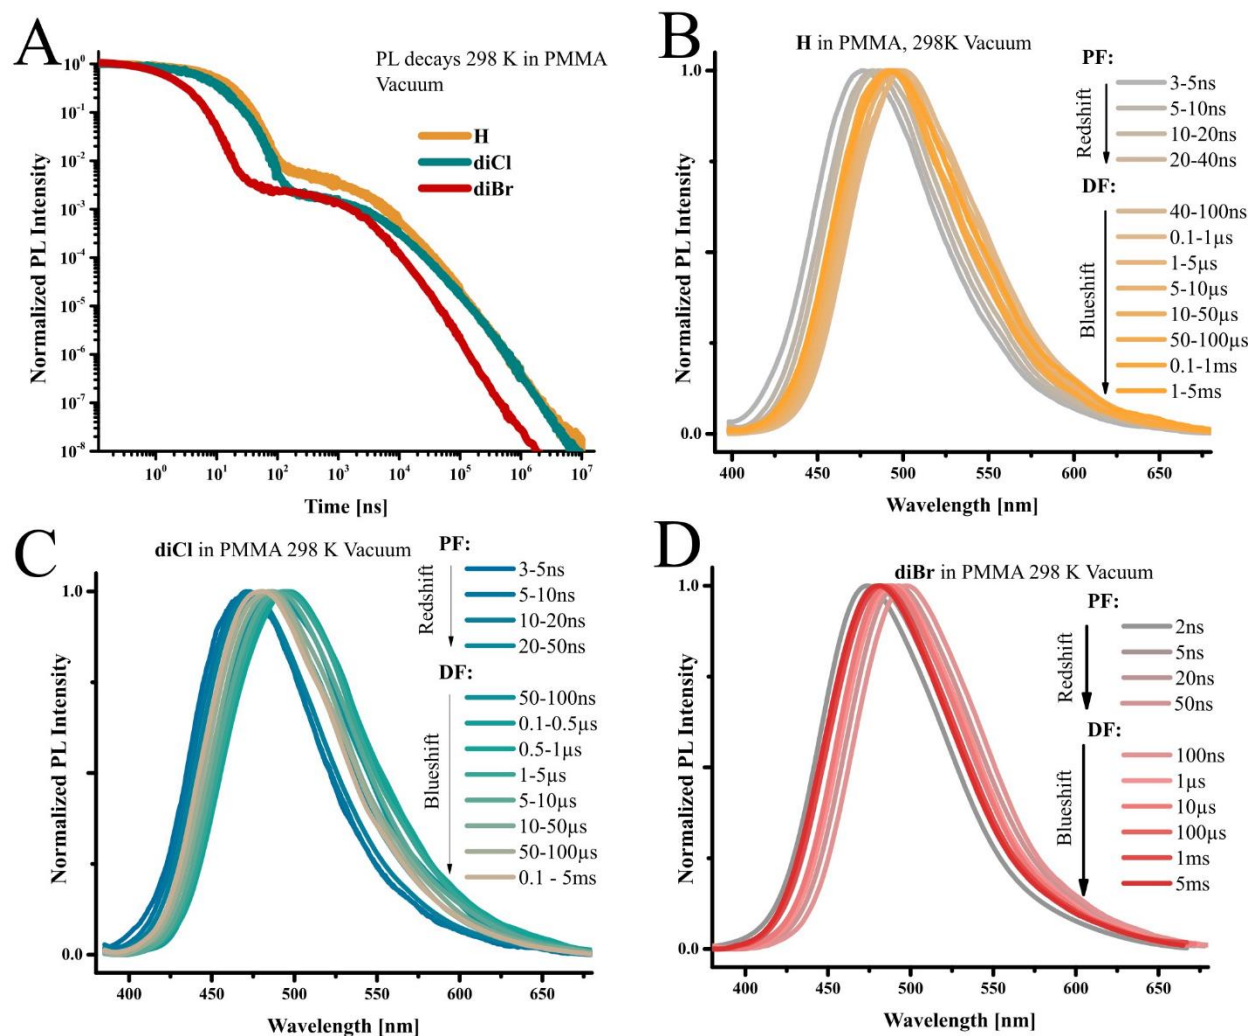

**Figure S9.** PL intensity decay profiles of **H**, **diCl**, and **diBr** in PMMA (A) with PL spectra taken at different time delays (B-D). Excitation wavelength  $\lambda_{\text{exc}}=370$  nm.

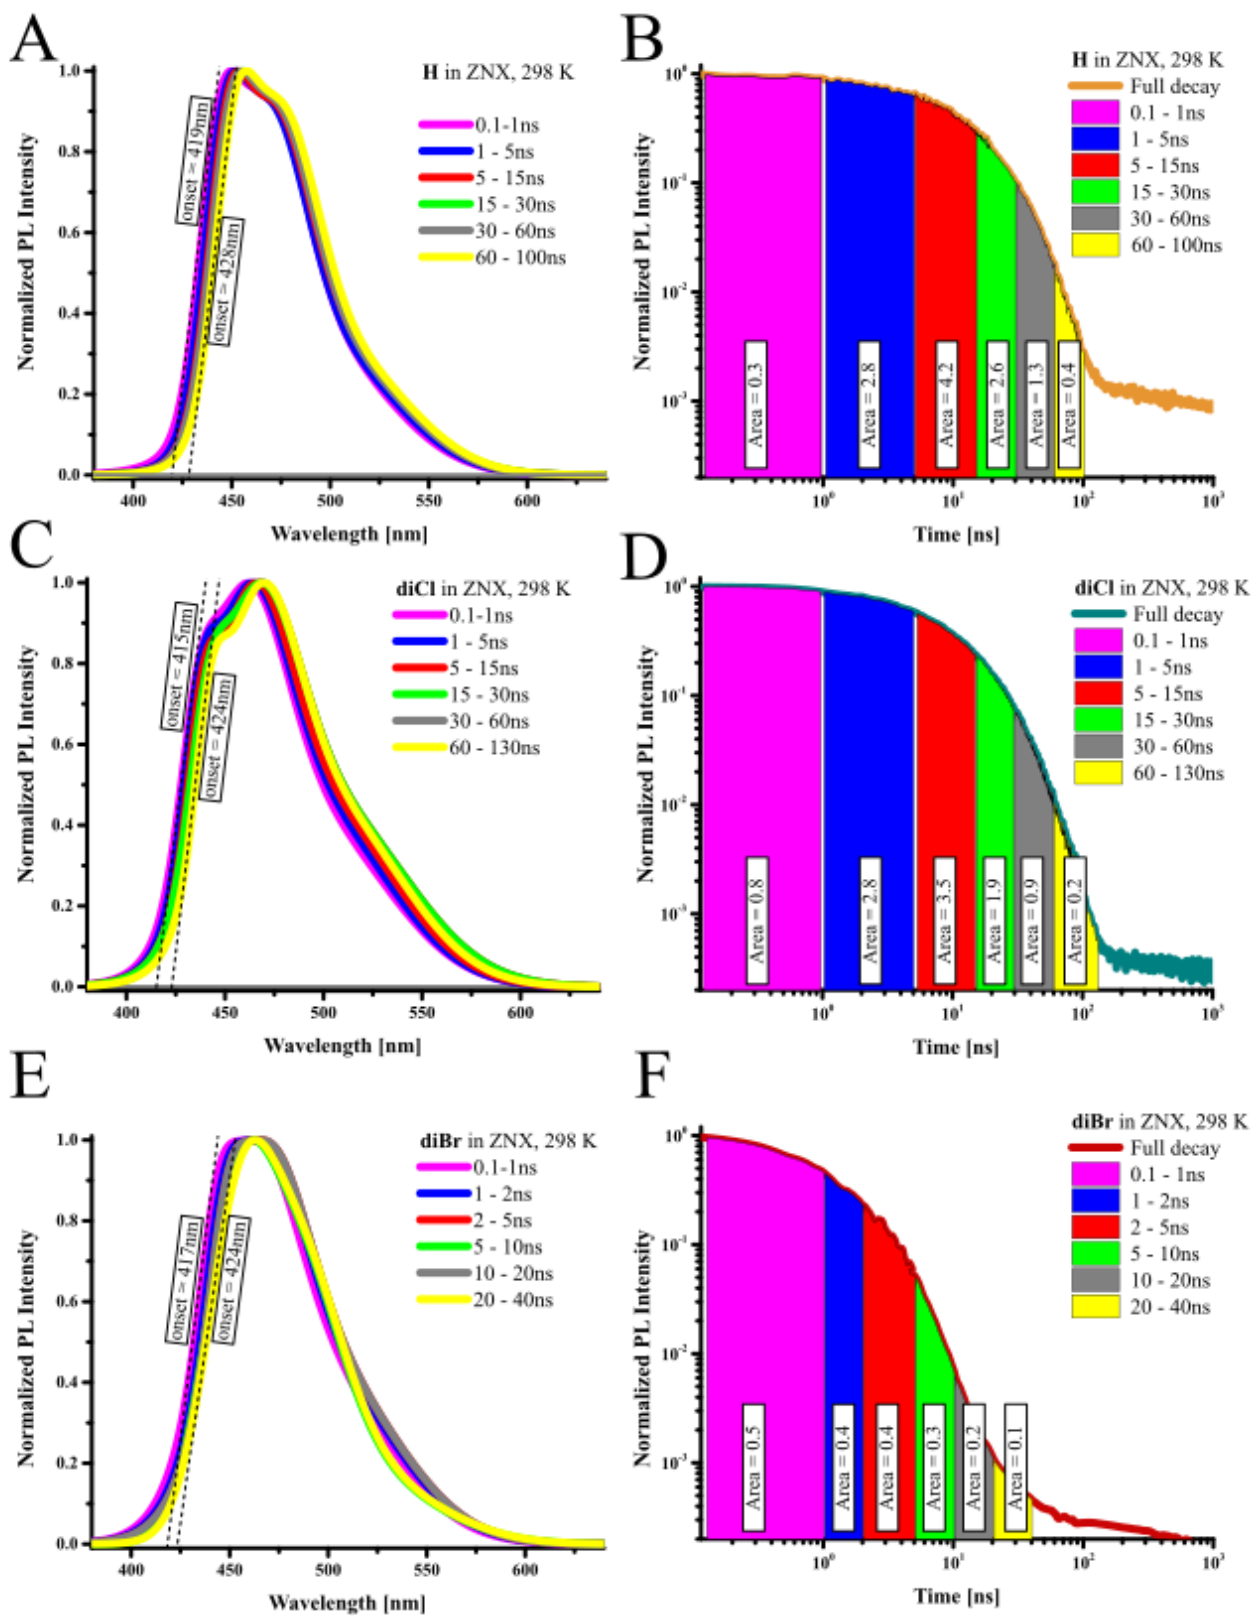

**Figure S10.** Time evolution of PL spectra within PF of **H**, **diCl** and **diBr** (A, C, E) with corresponding time frames (B, D, F) in ZNX measured at 298 K in vacuum. Excitation wavelength  $\lambda_{\text{exc}}=370$  nm.

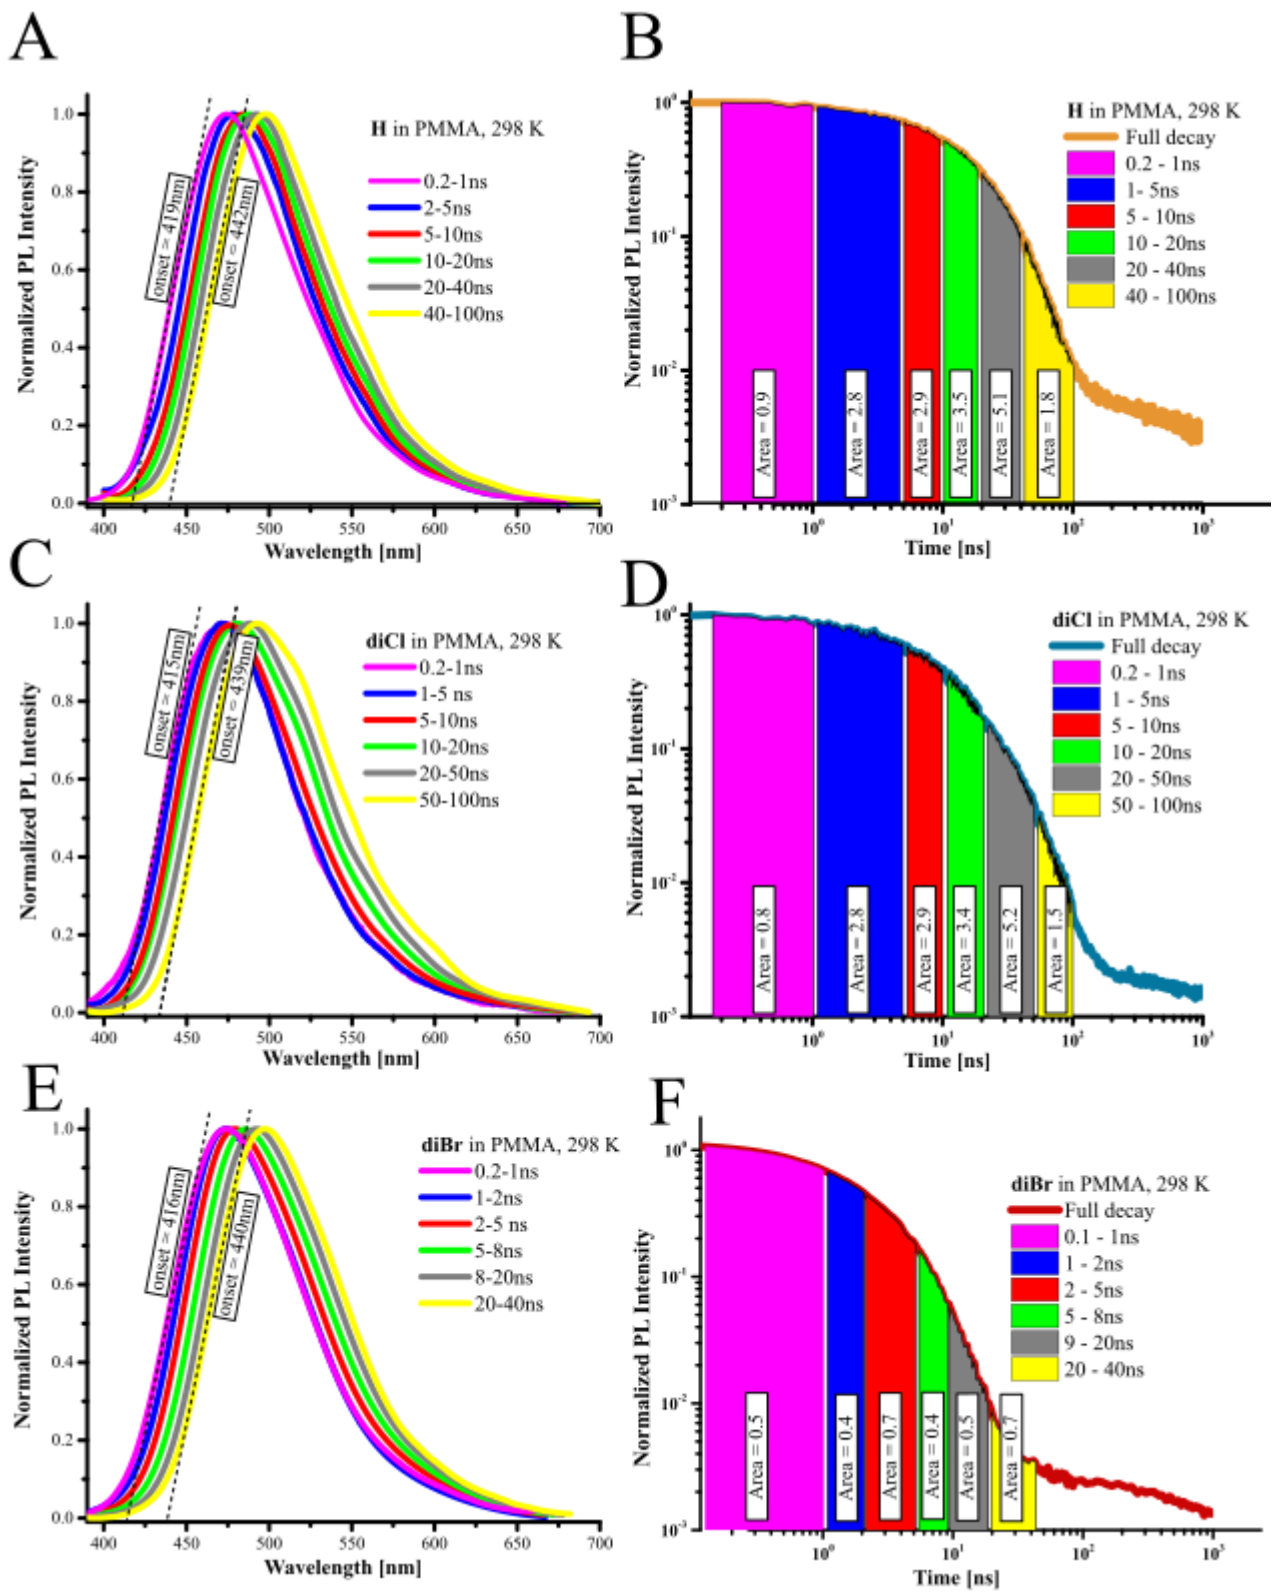

**Figure S11.** Time evolution of PL spectra within PF region of **H**, **diCl** and **diBr** (A, C, E) with corresponding time frames (B, D, F) in PMMA measured at 298 K in vacuum. Excitation wavelength  $\lambda_{\text{exc}}=370$  nm.

**Table S2.** Experimental determination of minimal, maximal and statistically mean <sup>1</sup>CT-onset values

| cmpd | Figures <sup>a</sup> | medium |                                                                                     | Time [ns] | Onset [nm] | Energy [eV] <sup>b</sup> | Area <sup>c</sup> | Contribution [%] |
|------|----------------------|--------|-------------------------------------------------------------------------------------|-----------|------------|--------------------------|-------------------|------------------|
| H    | S10A, S10B           | ZNX    | 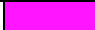   | 0.2-1     | 419        | 2.96                     | 0.7               | 5.8              |
|      |                      |        | 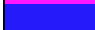   | 1-5       | 420        | 2.95                     | 2.8               | 23.2             |
|      |                      |        | 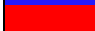   | 5-15      | 423        | 2.93                     | 4.2               | 35.0             |
|      |                      |        | 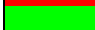   | 15-30     | 424        | 2.92                     | 2.6               | 21.7             |
|      |                      |        | 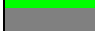   | 30-60     | 427        | 2.90                     | 1.3               | 11.0             |
|      |                      |        | 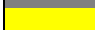   | 60-100    | 428        | 2.90                     | 0.4               | 3.4              |
|      |                      |        | Weighted average                                                                    |           | <b>423</b> | <b>2.93</b>              |                   |                  |
| diCl | S10C, S10D           | ZNX    | 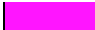   | 0.2-1     | 415        | 2.96                     | 0.8               | 7.9              |
|      |                      |        | 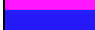   | 1-5       | 416        | 2.95                     | 2.8               | 27.8             |
|      |                      |        | 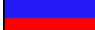   | 5-15      | 418        | 2.93                     | 3.5               | 34.0             |
|      |                      |        | 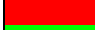   | 15-30     | 420        | 2.92                     | 1.9               | 19.1             |
|      |                      |        | 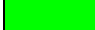   | 30-60     | 422        | 2.90                     | 0.9               | 9.1              |
|      |                      |        | 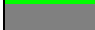   | 60-100    | 424        | 2.90                     | 0.2               | 2.0              |
|      |                      |        | Weighted average                                                                    |           | <b>418</b> | <b>2.97</b>              |                   |                  |
| diBr | S10E, S10F           | ZNX    | 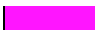   | 0.1-1     | 417        | 2.97                     | 0.5               | 26.1             |
|      |                      |        | 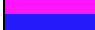   | 1-2       | 420        | 2.95                     | 0.4               | 21.6             |
|      |                      |        | 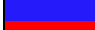   | 2-5       | 421        | 2.95                     | 0.4               | 21.0             |
|      |                      |        | 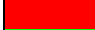   | 5-10      | 422        | 2.94                     | 0.3               | 15.9             |
|      |                      |        | 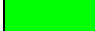   | 10-20     | 423        | 2.93                     | 0.3               | 10.6             |
|      |                      |        | 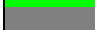   | 20-40     | 424        | 2.92                     | 0.1               | 5.3              |
|      |                      |        | Weighted average                                                                    |           | <b>421</b> | <b>2.95</b>              |                   |                  |
| H    | S11A, S11B           | PMMA   | 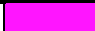 | 0.2-1     | 419        | 2.96                     | 0.9               | 5.1              |
|      |                      |        | 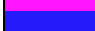 | 2-5       | 421        | 2.95                     | 2.8               | 16.1             |
|      |                      |        | 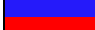 | 5-10      | 424        | 2.92                     | 2.9               | 16.8             |
|      |                      |        |  | 10-20     | 428        | 2.90                     | 3.5               | 20.5             |
|      |                      |        |  | 20-40     | 437        | 2.84                     | 5.1               | 30.5             |
|      |                      |        |  | 40-100    | 442        | 2.81                     | 1.8               | 10.9             |
|      |                      |        | Weighted average                                                                    |           | <b>430</b> | <b>2.88</b>              |                   |                  |
| diCl | S11C, S11D           | PMMA   | 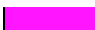 | 0.2-1     | 415        | 2.99                     | 0.8               | 4.9              |
|      |                      |        |  | 1-5       | 417        | 2.97                     | 2.8               | 17.3             |
|      |                      |        | 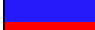 | 5-10      | 420        | 2.95                     | 2.9               | 17.8             |
|      |                      |        | 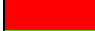 | 10-20     | 427        | 2.90                     | 3.4               | 20.5             |
|      |                      |        |  | 20-50     | 433        | 2.86                     | 5.2               | 30.9             |
|      |                      |        | 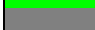 | 40-100    | 439        | 2.82                     | 1.5               | 8.8              |
|      |                      |        | Weighted average                                                                    |           | <b>427</b> | <b>2.91</b>              |                   |                  |
| diBr | S11E, S11F           | PMMA   | 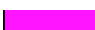 | 0.2-1     | 416        | 2.98                     | 0.5               | 15.2             |
|      |                      |        | 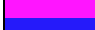 | 1-2       | 419        | 2.96                     | 0.4               | 12.3             |
|      |                      |        | 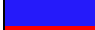 | 2-5       | 422        | 2.94                     | 0.7               | 21.5             |
|      |                      |        | 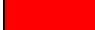 | 5-8       | 429        | 2.89                     | 0.4               | 12.5             |
|      |                      |        | 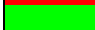 | 8-20      | 438        | 2.83                     | 0.5               | 16.0             |
|      |                      |        | 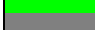 | 20-40     | 440        | 2.82                     | 0.7               | 22.4             |
|      |                      |        | Weighted average                                                                    |           | <b>428</b> | <b>2.90</b>              |                   |                  |

<sup>a</sup> – Figures demonstrating integration ranges and corresponding PL spectra;<sup>b</sup> – Energy calculated from relation:  $E = 1240/\lambda_{\text{onset}}$ ;<sup>c</sup> – Area obtained by integration of PL decay curve over specified time interval, as depicted in respective figures<sup>a</sup>.

**Table S3.** Minimal, maximal, and statistically mean values of energy gaps.

|             |      | $\Delta E_{\text{ICT-3CT}}$ [meV] |      |     | $\Delta E_{\text{ICT-3LE(A)}}$ [meV] |      |     | $\Delta E_{\text{ICT-3LE(D)}}$ [meV] |      |      |
|-------------|------|-----------------------------------|------|-----|--------------------------------------|------|-----|--------------------------------------|------|------|
|             |      | Min                               | Mean | Max | Min                                  | Mean | Max | Min                                  | Mean | Max  |
| <b>H</b>    | PMMA | 6                                 | 85   | 160 | -32                                  | 46   | 121 | -203                                 | -278 | -357 |
| <b>diCl</b> | PMMA | 13                                | 95   | 176 | -10                                  | 72   | 153 | -35                                  | -116 | -198 |
| <b>diBr</b> | PMMA | 6                                 | 86   | 169 | -20                                  | 60   | 143 | -24                                  | -109 | -189 |
| <b>H</b>    | ZNX  |                                   |      |     | 59                                   | 94   | 121 | -203                                 | -230 | -265 |
| <b>diCl</b> | ZNX  |                                   |      |     | 90                                   | 133  | 153 | -35                                  | -55  | -99  |
| <b>diBr</b> | ZNX  |                                   |      |     | 86                                   | 114  | 143 | -27                                  | -55  | -83  |

Energy gaps were determined from the difference of respective onsets of PL spectra, according to general equation:  $\Delta E_{1-2} = (1240/\lambda_{\text{onset1}} - 1240/\lambda_{\text{onset2}})$ .

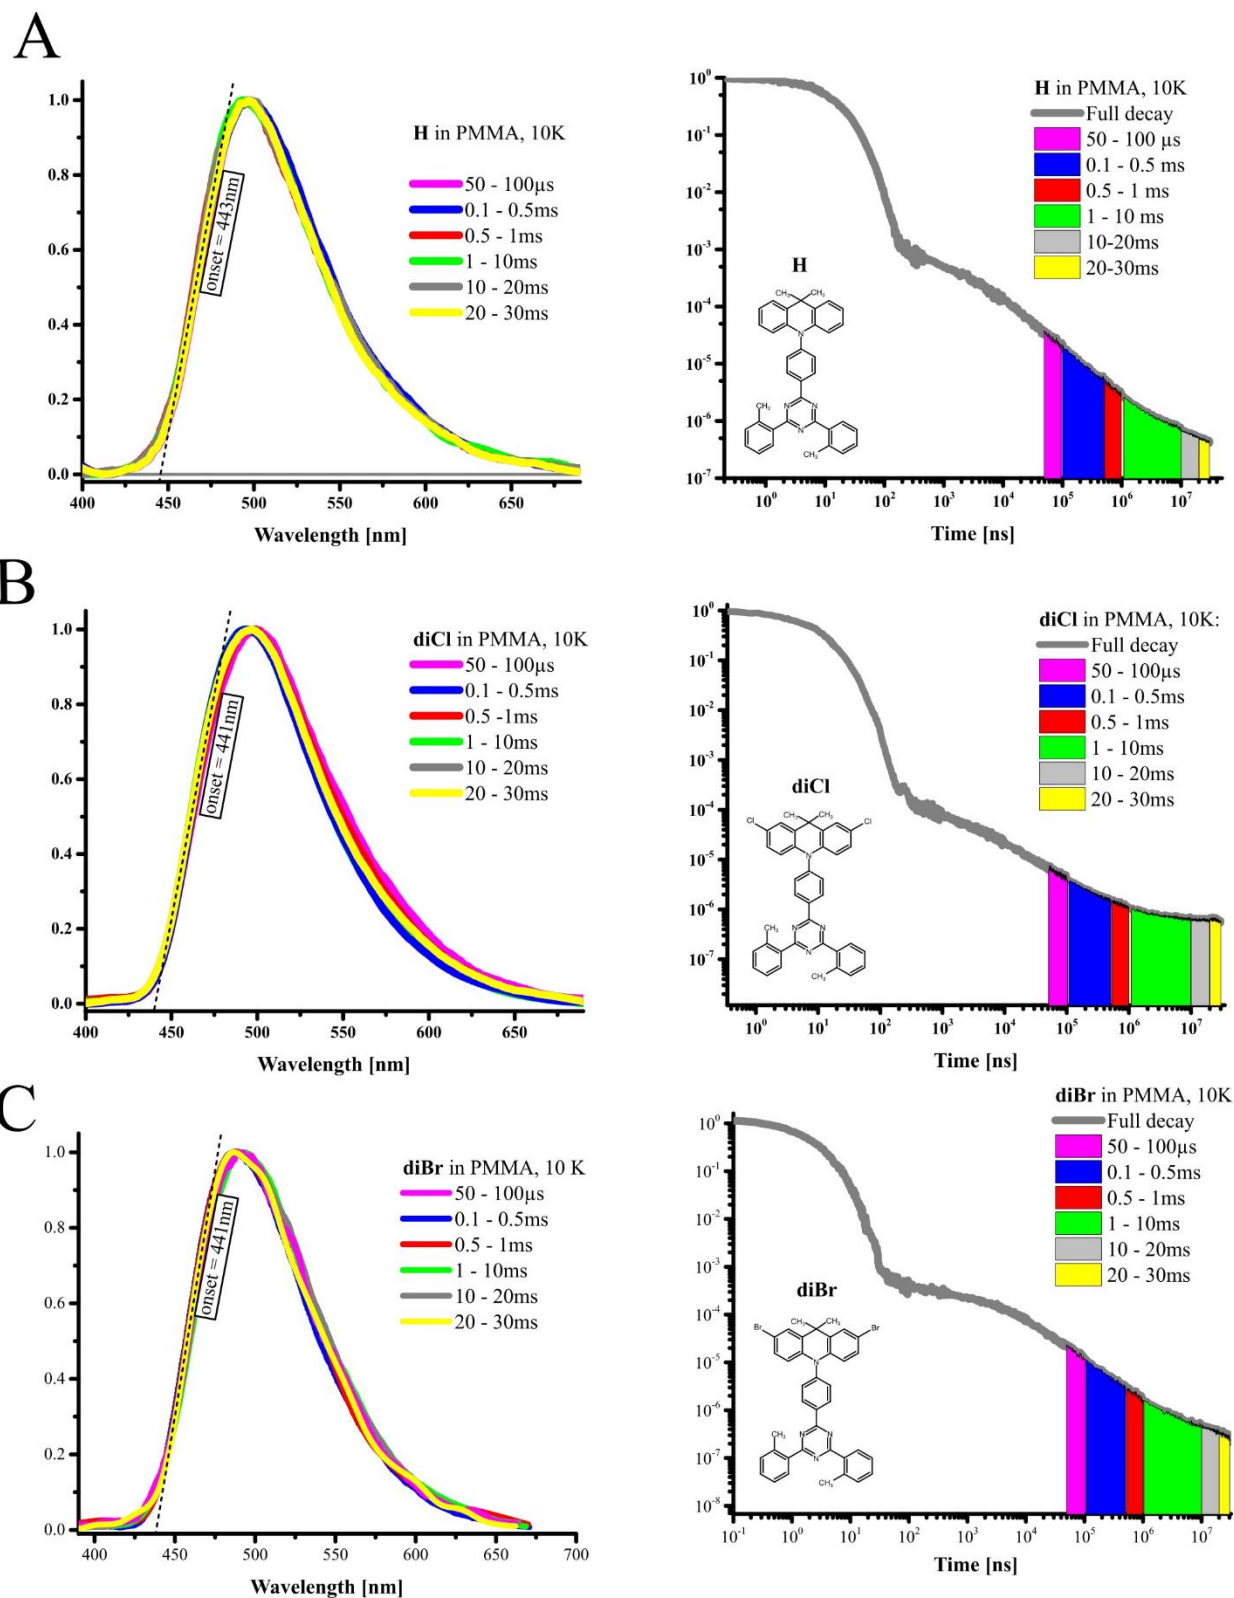

**Figure S12.** PL intensity decay profiles of **H**, **diCl**, and **diBr** in PMMA with PL spectra taken at different time delays measured at 10 K. Excitation wavelength  $\lambda_{\text{exc}}=370$  nm.

### Section S3: Determination of photophysical parameters

PL decay curves (presented in **Figures S8A, S9A and S13**) were fitted with the multiexponential equation:

$$I(t) = A_0 + \sum_{i=1}^n A_i \exp(-t/\tau_i) \quad (S1)$$

where  $A_i$  is the pre-exponential factor,  $\tau_i$  is the decay time and  $I(t)$  is emission intensity. Average lifetimes of prompt ( $\tau_{PF}$ ) and delayed fluorescence ( $\tau_{DF}$ ) were determined using the following formula:

$$\tau_{PF}, \tau_{DF} = \sum_{i=1}^n f_i \tau_i, \quad (S2)$$

where  $f_i$  is fractional contribution of  $i$ -th component expressed as:

$$f_i = \frac{A_i \tau_i}{\sum_{i=1}^n A_i \tau_i} \quad (S3)$$

The ratio of DF and PF quantum yields  $\phi_{DF}/\phi_{PF}$  was determined as follows [S4]:

$$\frac{\phi_{DF}}{\phi_{PF}} = \frac{\sum_{i=1}^n \tau_{DF(i)} A_{DF(i)}}{\sum_{j=1}^n \tau_{PF(j)} A_{PF(j)}} \quad (S4)$$

where  $A_{DF(i)}$  and  $A_{PF(j)}$  is the pre-exponential factor of delayed and prompt fluorescence component, respectively;  $\tau_{DF(i)}$  and  $\tau_{PF(j)}$  is the lifetime of delayed and prompt fluorescence component, respectively. The rate constants of radiative ( $k_r$ ) and nonradiative ( $k_{nr}$ ) decay and intersystem crossing ( $k_{ISC}$ ) are given by equations:

$$k_r = \frac{\phi_{PF}}{\tau_{PF}}, \quad (S5)$$

$$k_{ISC} = \frac{\phi_{DF}}{\phi \tau_{PF}}, \quad (S6)$$

$$k_{nr} = \frac{1}{\tau_{PF}} - (k_r + k_{ISC}). \quad (S7)$$

where  $\phi$  is PLQY ( $\phi_{DF} + \phi_{PF}$ ). Further, the quantum yields for ISC and rISC were calculated as

$$\phi_{ISC} = k_{ISC} \tau_{PF}, \quad (S8)$$

$$\phi_{rISC} = \frac{1 - \phi_{PF}/\phi}{\phi_{ISC}}. \quad (S9)$$

Finally, the rate constant of rISC ( $k_{rISC}$ ) was calculated as

$$k_{rISC} = \frac{\varphi_{rISC}}{\tau_{DF}} \left( \frac{\varphi}{\varphi_{PF}} \right). \quad (\text{S10})$$

Photophysical parameters are presented in **Tables 1** (main text) and **S4**.

**Table S4.** Experimentally determined photophysical parameters.

| Cmpd        | medium | $\varphi_{PF}$ | $\varphi_{DF}$ | $\varphi_{DF}/\varphi_{PF}$ | $\tau_{PF}$ | $\tau_{DF}$ | $k_r$                    | $k_{ISC}$                | $k_{rISC}$               |
|-------------|--------|----------------|----------------|-----------------------------|-------------|-------------|--------------------------|--------------------------|--------------------------|
|             |        | [%]            | [%]            |                             | [ns]        | [ $\mu$ s]  | [ $\text{s}^{-1} 10^7$ ] | [ $\text{s}^{-1} 10^7$ ] | [ $\text{s}^{-1} 10^4$ ] |
| <b>H</b>    | ZNX    | 22.1           | 27.9           | 1.3                         | 15.3        | 171         | 1.5                      | 5.1                      | 1.03                     |
| <b>diCl</b> |        | 21.6           | 53.2           | 2.5                         | 13.1        | 333         | 1.8                      | 6.1                      | 0.87                     |
| <b>diBr</b> |        | 4.5            | 6.5            | 1.4                         | 2.2         | 104         | 2.0                      | 38.5                     | 1.74                     |
| <b>H</b>    | PMMA   | 33.4           | 63.3           | 1.8                         | 17.1        | 96          | 2.1                      | 3.8                      | 2.92                     |
| <b>diCl</b> |        | 32.4           | 53.1           | 1.6                         | 16.0        | 139         | 2.0                      | 4.1                      | 1.85                     |
| <b>diBr</b> |        | 5.7            | 15.1           | 2.7                         | 2.8         | 38          | 2.0                      | 30.8                     | 8.23                     |

## Section S4: Temperature-dependent time-resolved analysis based on Arrhenius and Marcus theories

Time-resolved PL measurements were conducted within the temperature range of 298–10 K (**Figure S13**). The PL decays in the 298 – 150 K range contained only prompt and delayed fluorescence, thus phosphorescence did not interfere. The latter temperature range was thus used for further investigations. The PL decay analysis as described in section S3 enabled  $k_{ISC}$  and  $k_{rISC}$  constant rates at various temperatures (**Tables S5, S6**). To determine the energy barriers  $E_a$  for ISC and rISC, the Arrhenius law equation was applied:

$$k_{(r)ISC} = A \cdot \exp\left(-\frac{E_a}{k_B T}\right), \quad (\text{S11})$$

where  $k_B$  stands for Boltzmann constant, and  $A$  is pre-exponential constant (**Table 2**, main text).

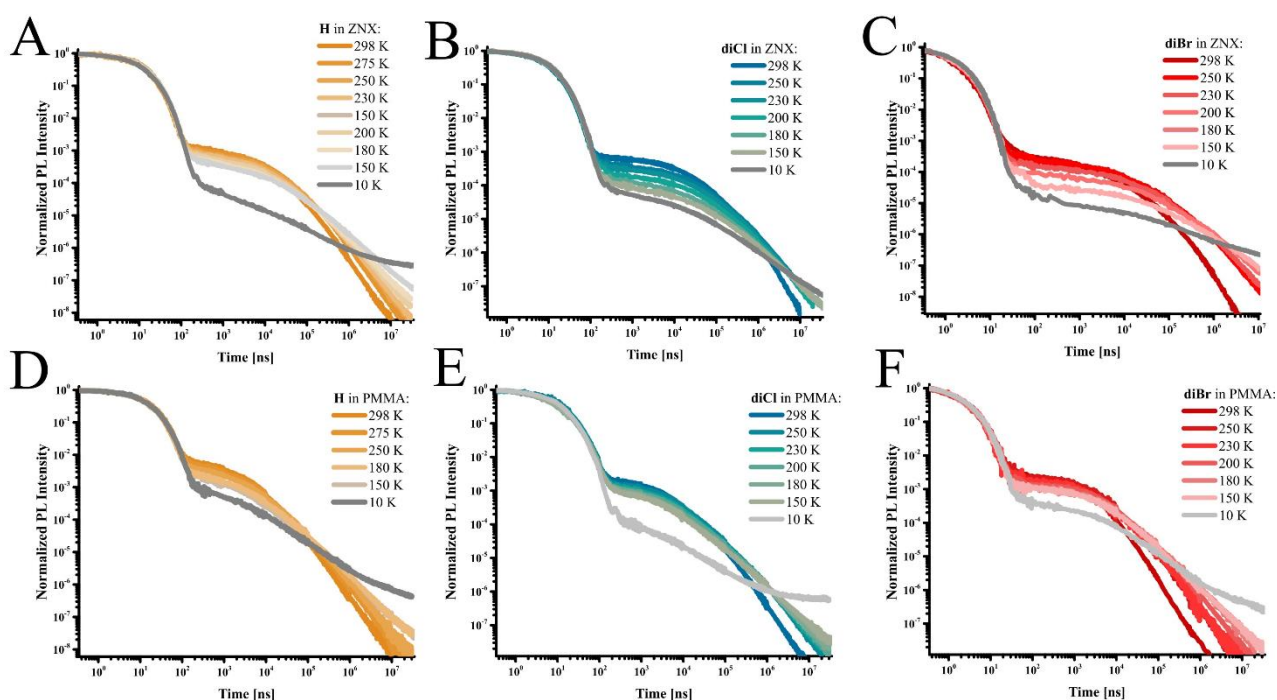

**Figure S13.** PL intensity decay profiles of **H**, **diCl**, and **diBr** in ZNX (A-C) and PMMA (D-F) conducted in various temperatures within 298-10 K. Excitation wavelength  $\lambda_{exc}=370$  nm.

**Table S5.** Photophysical parameters in ZNX at various temperatures with corresponding linear regression parameters.

| ZNX      |       |                    |                          |                           |                               |                              |                                |                |                 |
|----------|-------|--------------------|--------------------------|---------------------------|-------------------------------|------------------------------|--------------------------------|----------------|-----------------|
|          | T [K] | $\tau_{PF}^b$ [ns] | $\tau_{DF}^b$ [ $\mu$ s] | $k_r$ $10^7$ [s $^{-1}$ ] | $k_{ISC}$ $10^7$ [s $^{-1}$ ] | $k_{nr}$ $10^7$ [s $^{-1}$ ] | $k_{rISC}$ $10^4$ [s $^{-1}$ ] | $\ln(k_{ISC})$ | $\ln(k_{rISC})$ |
| <b>H</b> | 298   | 15.3               | 171                      | 1.5                       | 5.1                           | 0.0                          | 1.03                           | 17.7           | 9.16            |
|          | 275   | 15.3               | 376                      | 1.5                       | 5.1                           | 0.0                          | 0.58                           | 17.7           | 8.67            |
|          | 250   | 15.3               | 724                      | 1.5                       | 5.1                           | 0.0                          | 0.30                           | 17.7           | 7.98            |
|          | 230   | 15.3               | 806                      | 1.5                       | 5.1                           | 0.0                          | 0.24                           | 17.7           | 7.78            |
|          | 200   | 15.3               | 2328                     | 1.5                       | 5.1                           | 0.0                          | 0.08                           | 17.7           | 6.71            |
|          | 180   | 15.3               | 6799                     | 1.5                       | 5.1                           | 0.0                          | 0.03                           | 17.7           | 5.67            |
|          | 150   | 15.3               | 30855                    | 1.5                       | 5.1                           | 0.0                          | 0.01                           | 17.7           | 4.31            |

Parameters of linear regression for rISC derived from (S11):

|                         |       |
|-------------------------|-------|
| Slope                   | 1447  |
| Intercept               | 14.02 |
| $E_a$ [meV]             | 124   |
| $A$ [s $^{-1}$ $10^7$ ] | 0.12  |

|             | T [K] | $\tau_{PF}^b$ [ns] | $\tau_{DF}^b$ [ $\mu$ s] | $k_r$ $10^7$ [s $^{-1}$ ] | $k_{ISC}$ $10^7$ [s $^{-1}$ ] | $k_{nr}$ $10^7$ [s $^{-1}$ ] | $k_{rISC}$ $10^4$ [s $^{-1}$ ] | $\ln(k_{ISC})$ | $\ln(k_{rISC})$ |
|-------------|-------|--------------------|--------------------------|---------------------------|-------------------------------|------------------------------|--------------------------------|----------------|-----------------|
| <b>diCl</b> | 298   | 12.9               | 333                      | 1.7                       | 6.1                           | 0.0                          | 0.87                           | 17.9           | 9.1             |
|             | 250   | 12.8               | 1167                     | 1.7                       | 6.1                           | 0.0                          | 0.27                           | 17.9           | 7.9             |
|             | 230   | 12.9               | 1547                     | 1.7                       | 6.1                           | 0.0                          | 0.17                           | 17.9           | 7.4             |
|             | 200   | 12.9               | 3013                     | 1.7                       | 6.1                           | 0.0                          | 0.08                           | 17.9           | 6.7             |
|             | 180   | 12.9               | 6658                     | 1.7                       | 6.1                           | 0.0                          | 0.02                           | 17.9           | 5.5             |
|             | 150   | 13.0               | 17755                    | 1.7                       | 6.1                           | 0.0                          | 0.01                           | 17.9           | 4.5             |

Parameters of linear regression for rISC derived from (S11):

|                         |       |
|-------------------------|-------|
| Slope                   | 1475  |
| Intercept               | 13.71 |
| $E_a$ [meV]             | 127   |
| $A$ [s $^{-1}$ $10^7$ ] | 0.09  |

|             | T [K] | $\tau_{PF}^b$ [ns] | $\tau_{DF}^b$ [ $\mu$ s] | $k_r$ $10^7$ [s $^{-1}$ ] | $k_{ISC}$ $10^7$ [s $^{-1}$ ] | $k_{nr}$ $10^7$ [s $^{-1}$ ] | $k_{rISC}$ $10^4$ [s $^{-1}$ ] | $\ln(k_{ISC})$ | $\ln(k_{rISC})$ |
|-------------|-------|--------------------|--------------------------|---------------------------|-------------------------------|------------------------------|--------------------------------|----------------|-----------------|
| <b>diBr</b> | 298   | 2.2                | 104                      | 2.0                       | 38.5                          | 3.8                          | 1.74                           | 19.7           | 9.7             |
|             | 250   | 2.2                | 816                      | 2.0                       | 38.5                          | 1.8                          | 0.56                           | 19.7           | 8.6             |
|             | 230   | 2.3                | 1435                     | 2.0                       | 38.5                          | 1.7                          | 0.29                           | 19.7           | 7.9             |
|             | 180   | 2.3                | 9272                     | 2.0                       | 38.5                          | 1.2                          | 0.05                           | 19.7           | 6.2             |
|             | 150   | 2.3                | 32595                    | 2.0                       | 38.5                          | 0.4                          | 0.01                           | 19.7           | 4.9             |

Parameters of linear regression for rISC derived from (S11):

|                         |       |
|-------------------------|-------|
| Slope                   | 1443  |
| Intercept               | 14.31 |
| $E_a$ [meV]             | 125   |
| $A$ [s $^{-1}$ $10^7$ ] | 0.16  |

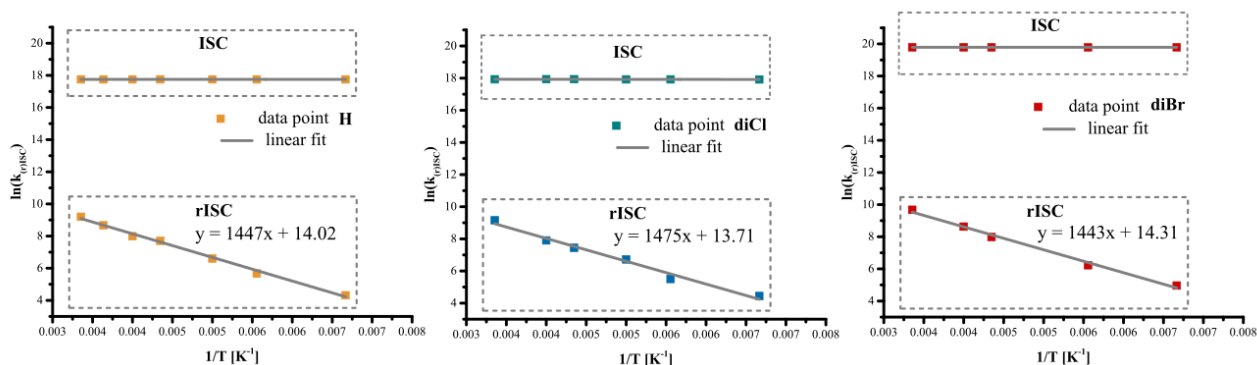

**Figure S14.** Arrhenius plots for emitters dispersed in ZNX.

**Table S6.** Photophysical parameters in PMMA at various temperatures with corresponding linear regression parameters.

| PMMA                                                         |       |                    |                          |                           |                               |                              |                                |                |                 |
|--------------------------------------------------------------|-------|--------------------|--------------------------|---------------------------|-------------------------------|------------------------------|--------------------------------|----------------|-----------------|
|                                                              | T [K] | $\tau_{PF}^b$ [ns] | $\tau_{DF}^b$ [ $\mu$ s] | $k_r$ $10^7$ [ $s^{-1}$ ] | $k_{ISC}$ $10^7$ [ $s^{-1}$ ] | $k_{nr}$ $10^7$ [ $s^{-1}$ ] | $k_{rISC}$ $10^4$ [ $s^{-1}$ ] | $\ln(k_{ISC})$ | $\ln(k_{rISC})$ |
| <b>H</b>                                                     | 298   | 17.2               | 96                       | 2.0                       | 3.8                           | 0.04                         | 2.92                           | 17.4           | 10.1            |
|                                                              | 275   | 17.1               | 188                      | 2.1                       | 3.8                           | 0.03                         | 1.45                           | 17.4           | 9.6             |
|                                                              | 250   | 17.1               | 328                      | 2.1                       | 3.8                           | 0.02                         | 0.82                           | 17.4           | 9.0             |
|                                                              | 180   | 17.2               | 1773                     | 2.0                       | 3.8                           | 0.01                         | 0.15                           | 17.4           | 7.3             |
|                                                              | 150   | 17.1               | 4357                     | 2.1                       | 3.8                           | 0.00                         | 0.06                           | 17.4           | 6.4             |
| Parameters of linear regression for rISC derived from (S11): |       |                    |                          |                           |                               |                              |                                |                |                 |
| Slope                                                        |       | 1137               |                          |                           |                               |                              |                                |                |                 |
| Intercept                                                    |       | 13.71              |                          |                           |                               |                              |                                |                |                 |
| $E_a$ [meV]                                                  |       | 98                 |                          |                           |                               |                              |                                |                |                 |
| $A$ [ $s^{-1}$ $10^7$ ]                                      |       | 0.09               |                          |                           |                               |                              |                                |                |                 |

  

|                                                              | T [K] | $\tau_{PF}^b$ [ns] | $\tau_{DF}^b$ [ $\mu$ s] | $k_r$ $10^7$ [ $s^{-1}$ ] | $k_{ISC}$ $10^7$ [ $s^{-1}$ ] | $k_{nr}$ $10^7$ [ $s^{-1}$ ] | $k_{rISC}$ $10^4$ [ $s^{-1}$ ] | $\ln(k_{ISC})$ | $\ln(k_{rISC})$ |
|--------------------------------------------------------------|-------|--------------------|--------------------------|---------------------------|-------------------------------|------------------------------|--------------------------------|----------------|-----------------|
| <b>diCl</b>                                                  | 298   | 16.0               | 139                      | 2.1                       | 4.1                           | 0.11                         | 1.85                           | 17.5           | 9.8             |
|                                                              | 250   | 16.0               | 431                      | 2.1                       | 4.1                           | 0.10                         | 0.67                           | 17.5           | 8.7             |
|                                                              | 230   | 16.0               | 701                      | 2.1                       | 4.1                           | 0.08                         | 0.36                           | 17.5           | 8.2             |
|                                                              | 200   | 15.9               | 1165                     | 2.2                       | 4.1                           | 0.06                         | 0.20                           | 17.5           | 7.6             |
|                                                              | 180   | 16.1               | 2050                     | 2.1                       | 4.1                           | 0.03                         | 0.11                           | 17.5           | 7.0             |
|                                                              | 150   | 16.1               | 5392                     | 2.1                       | 4.1                           | 0.01                         | 0.04                           | 17.5           | 6.0             |
| Parameters of linear regression for rISC derived from (S11): |       |                    |                          |                           |                               |                              |                                |                |                 |
| Slope                                                        |       | 1098               |                          |                           |                               |                              |                                |                |                 |
| Intercept                                                    |       | 13.23              |                          |                           |                               |                              |                                |                |                 |
| $E_a$ [meV]                                                  |       | 95                 |                          |                           |                               |                              |                                |                |                 |
| $A$ [ $s^{-1}$ $10^7$ ]                                      |       | 0.06               |                          |                           |                               |                              |                                |                |                 |

  

|                                                              | T [K] | $\tau_{PF}^b$ [ns] | $\tau_{DF}^b$ [ $\mu$ s] | $k_r$ $10^7$ [ $s^{-1}$ ] | $k_{ISC}$ $10^7$ [ $s^{-1}$ ] | $k_{nr}$ $10^7$ [ $s^{-1}$ ] | $k_{rISC}$ $10^4$ [ $s^{-1}$ ] | $\ln(k_{ISC})$ | $\ln(k_{rISC})$ |
|--------------------------------------------------------------|-------|--------------------|--------------------------|---------------------------|-------------------------------|------------------------------|--------------------------------|----------------|-----------------|
| <b>diBr</b>                                                  | 298   | 2.6                | 38                       | 2.1                       | 30.8                          | 3.1                          | 8.23                           | 19.5           | 11.2            |
|                                                              | 250   | 2.6                | 110                      | 2.1                       | 30.8                          | 2.9                          | 4.43                           | 19.5           | 10.7            |
|                                                              | 230   | 2.6                | 179                      | 2.0                       | 30.8                          | 2.8                          | 2.26                           | 19.5           | 10.1            |
|                                                              | 200   | 2.6                | 386                      | 2.1                       | 30.8                          | 2.0                          | 1.30                           | 19.5           | 9.5             |
|                                                              | 180   | 2.8                | 672                      | 2.0                       | 30.8                          | 1.8                          | 0.72                           | 19.5           | 8.9             |
|                                                              | 150   | 2.8                | 1738                     | 2.0                       | 30.8                          | 1.5                          | 0.27                           | 19.5           | 7.9             |
| Parameters of linear regression for rISC derived from (S11): |       |                    |                          |                           |                               |                              |                                |                |                 |
| Slope                                                        |       | 1071               |                          |                           |                               |                              |                                |                |                 |
| Intercept                                                    |       | 14.77              |                          |                           |                               |                              |                                |                |                 |
| $E_a$ [meV]                                                  |       | 92                 |                          |                           |                               |                              |                                |                |                 |
| $A$ [ $s^{-1}$ $10^7$ ]                                      |       | 0.26               |                          |                           |                               |                              |                                |                |                 |

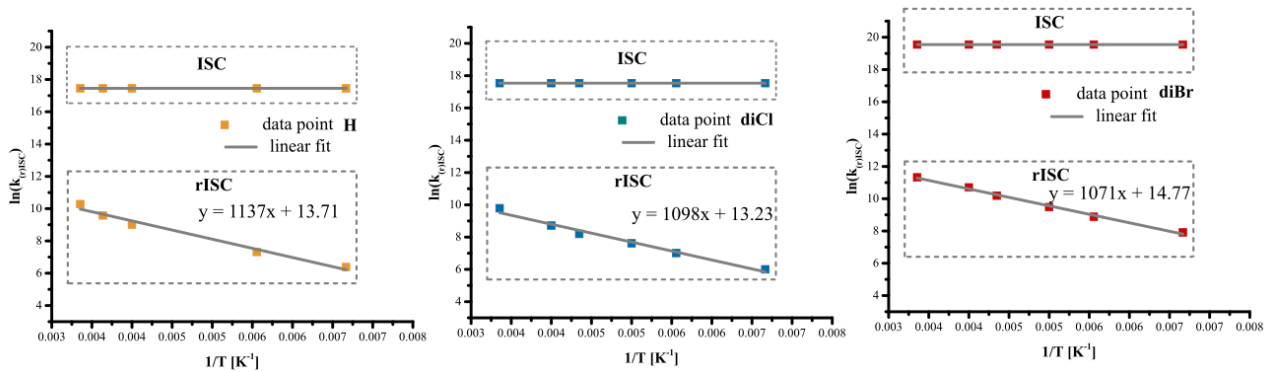

**Figure S15.** Arrhenius plots for emitters dispersed in PMMA.

More detailed information can be derived using the Marcus-Hush equation:

$$k_{(r)ISC} = \frac{V^2}{\hbar} \sqrt{\frac{\pi}{k_B T \lambda}} \exp \left[ -\frac{(\Delta E_{ST} + \lambda)^2}{4k_B T \lambda} \right], \quad (S12)$$

where  $V$  is SOC constant,  $\hbar$  is reduced Planck's constant,  $\lambda$  is sum of internal and external ( $\lambda_{solv}$ ) reorganization energies for respective transition,  $\Delta E_{ST}$  is the energy gap between singlet  $^1CT$  and respective triplet state. This semiclassical expression, commonly used to predict constant rates for non-radiative transitions in D-A structure of TADF compounds can be connected with the Arrhenius equation (S11) by the following relations:

$$A = \frac{V^2}{\hbar} \sqrt{\frac{\pi}{k_B T \lambda}}, \quad (S13)$$

$$E_a = \frac{(\Delta E_{ST} + \lambda)^2}{4\lambda}. \quad (S14)$$

Consequently, by matching the  $\Delta E_{ST}$  and  $\lambda$  parameters to satisfy both relations, where  $E_a$  and  $A$  are derived from Arrhenius plot, it is possible to estimate empirical SOC values  $V$  for each transition, as it is presented in **Table 2** (main text).

As discussed in main text, because ISC transition does not require thermal activation under all conditions investigated ( $E_a = 0$ ), the relation (S14) predicts the same values of  $\Delta E_{ST}$  and  $\lambda$ :

$$\Delta E_{ST} = \lambda. \quad (S15)$$

Assuming equal values of  $\Delta E_{ST}$  for both ISC and rISC (S6):

$$\Delta E_{ST}(ISC) = -\Delta E_{ST}(rISC), \quad (S16)$$

the  $\Delta E_{ST}$  and  $\lambda$  values can be obtained from eq. (S14) and  $E_a$  (**Table 2**). The  $V_{ISC}$  and  $V_{rISC}$  parameters are then available from eq. (S14) and  $A$  (**Table 2**):

$$A_{ISC} = \frac{V_{ISC}^2}{\hbar} \sqrt{\frac{\pi}{k_B T \lambda}}, \quad (S17)$$

$$A_{rISC} = \frac{V_{rISC}^2}{\hbar} \sqrt{\frac{\pi}{k_B T \lambda}}. \quad (S18)$$

The assumption (S16) seems to be valid because regardless of the ISC and rISC mechanism, the  $\Delta E_{1CT-3CT}$  and  $\Delta E_{1CT-3LE(A)}$  values were determined to be similar (**Table 1**). On the other hand, the changes in the obtained  $V_{ISC}$  and  $V_{rISC}$  values are much greater than those in  $\Delta E_{ST}$ . Therefore, the assumption (S16) introduces minor uncertainty and does not affect the most important conclusions made for ISC and rISC mechanisms.

*Test for the comparability of the investigated emitters.* In an ideal case, to compare different emitters under the conditions of isomeric inhomogeneity, same kinds of their rotational and vibrational isomers should be taken into account in the similar amounts. To check if this criterion is fulfilled the analysis of Arrhenius plot can be performed. In the current example, despite the fact that the  $k_{nr}$  values are different under various temperatures, their change does not affect the dependence of  $k_{rISC}$  on  $1/T$ : 1) the  $k_{rISC}(1/T)$  dependence remains linear for all the investigated temperature range; 2) the slope of the  $k_{rISC}(1/T)$  dependence is almost identical for all three compounds (Figures S14 and S15). This means that all kinds of the rotational and vibrational isomers are represented under various temperatures and in all three compounds. None of the rotational and vibrational isomers are added or eliminated under the change of temperature. In other words, the investigated molecular systems are totally comparable but represent with different emission intensity due to different PLQY.

Strong temperature dependence of  $k_{nr}$  in both **diCl** and **diBr**, evidence that main nonradiative deactivation channel can be activated by the molecular vibrations involving heavy atom(s). However, good photochemical stability of the investigated samples under experimental conditions, i.e. irradiation with 10 mJ laser beam, indicates the breakage of neither C–Br nor C–Cl bond is responsible for the non-radiative deactivation.

## Section S5: Theoretical prediction of ISC and rISC rate constants for the <sup>1</sup>CT-<sup>3</sup>LE transitions

**Calculations for ISC rate constants.** Theoretical rate constants of ISC and rISC were calculated using Marcus-Hush equation (S12). According to the IUPAC definition, [S5] term reorganization energy  $\lambda$  corresponds to the energy that is dissipated by molecule that underwent vertical excitation, when relaxing to the equilibrium state for its new charge distribution. Commonly, total  $\lambda$  is a sum of inner ( $\lambda_{\text{in}}$ ) and outer ( $\lambda_{\text{out}}$ ) reorganization energies:

$$\lambda = \lambda_{\text{in}} + \lambda_{\text{out}}. \quad (\text{S19})$$

By performing single-point TD-DFT calculations for **H**, **diCl** and **diBr**, we determined the values of inner reorganization energies  $\lambda_{\text{in}}$  for each ISC transition, namely:

- <sup>1</sup>CT → <sup>3</sup>LE(A):  $\lambda_{\text{in}} = \lambda_{1\text{CT} \rightarrow 3\text{LE(A)}}$
- <sup>1</sup>CT → <sup>3</sup>LE(D):  $\lambda_{\text{in}} = \lambda_{1\text{CT} \rightarrow 3\text{LE(D)}}$

using the following formulas:

$$\lambda_{1\text{CT} \rightarrow 3\text{LE(A)}} = E_{3\text{LE(A)}}^{1\text{CT}} - E_{3\text{LE(A)}}^{3\text{LE(A)}}, \quad (\text{S20})$$

$$\lambda_{1\text{CT} \rightarrow 3\text{LE(D)}} = E_{3\text{LE(D)}}^{1\text{CT}} - E_{3\text{LE(D)}}^{3\text{LE(D)}}, \quad (\text{S21})$$

where:

$E_{3\text{LE(A)}}^{1\text{CT}}$  - TD-DFT energy of <sup>3</sup>LE(A) excited state at the <sup>1</sup>CT optimized geometry

$E_{3\text{LE(A)}}^{3\text{LE(A)}}$  - TD-DFT energy of <sup>3</sup>LE(A) excited state at the <sup>3</sup>LE(A) optimized geometry

$E_{3\text{LE(D)}}^{1\text{CT}}$  - TD-DFT energy of <sup>3</sup>LE(D) excited state at the <sup>1</sup>CT optimized geometry,

$E_{3\text{LE(D)}}^{3\text{LE(D)}}$  - TD-DFT energy of <sup>3</sup>LE(D) excited state at the <sup>3</sup>LE(D) optimized geometry.

The  $\lambda_{\text{out}}$  value of 0.05 eV was used for all calculations.

Since DFT fails to predict  $\Delta E_{\text{ST}}$ , the experimentally determined mean values of  $\Delta E_{1\text{CT}-3\text{LE(A)}}$  and  $\Delta E_{1\text{CT}-3\text{LE(D)}}$  were used (**Table 1**, main text).

Computed reorganization energies for respective ISC transitions:

| cmpd        | $^1\text{CT} \rightarrow ^3\text{LE(A)}$ |                                     |                                                  | $^1\text{CT} \rightarrow ^3\text{LE(D)}$ : |                                     |                                                  |
|-------------|------------------------------------------|-------------------------------------|--------------------------------------------------|--------------------------------------------|-------------------------------------|--------------------------------------------------|
|             | $E_{3\text{LE(A)}}^{1\text{CT}}$         | $E_{3\text{LE(A)}}^{3\text{LE(A)}}$ | $\lambda_{1\text{CT} \rightarrow 3\text{LE(A)}}$ | $E_{3\text{LE(D)}}^{1\text{CT}}$           | $E_{3\text{LE(D)}}^{3\text{LE(D)}}$ | $\lambda_{1\text{CT} \rightarrow 3\text{LE(D)}}$ |
|             | [a. u]                                   | [a. u]                              | [eV]                                             | [a. u]                                     | [a. u]                              | [eV]                                             |
| <b>H</b>    | -1607.3656182                            | -1607.3715987                       | 0.17                                             | -1607.3509293                              | -1607.3594832                       | 0.23                                             |
| <b>diCl</b> | -1636.0412315                            | -1636.0470891                       | 0.16                                             | -1636.0292145                              | -1636.0381835                       | 0.24                                             |
| <b>diBr</b> | -1632.4758713                            | -1632.4840055                       | 0.22                                             | -1632.4653425                              | -1632.4757523                       | 0.28                                             |

**Table S7.** Computational data for prediction ISC constant rate within  $^1\text{CT} \rightarrow ^3\text{LE(A)}$  transition

|             |      | $V_{1\text{CT} \rightarrow 3\text{LE(A)}}^a$ | $\lambda_{1\text{CT} \rightarrow 3\text{LE(A)}}^b$ | $\Delta E_{1\text{CT} \rightarrow 3\text{LE(A)}}^c$ | $k_{1\text{CT} \rightarrow 3\text{LE(A)}}^d$ |
|-------------|------|----------------------------------------------|----------------------------------------------------|-----------------------------------------------------|----------------------------------------------|
|             |      | [cm <sup>-1</sup> ]                          | [eV]                                               | [eV]                                                | 10 <sup>7</sup> [s <sup>-1</sup> ]           |
| <b>H</b>    | ZNX  | 0.63                                         | 0.17                                               | -0.09                                               | 6.69                                         |
| <b>diCl</b> |      | 0.49                                         | 0.16                                               | -0.13                                               | 6.45                                         |
| <b>diBr</b> |      | 0.59                                         | 0.22                                               | -0.11                                               | 4.27                                         |
| <b>H</b>    | PMMA | 0.63                                         | 0.17                                               | -0.05                                               | 3.41                                         |
| <b>diCl</b> |      | 0.49                                         | 0.16                                               | -0.07                                               | 3.12                                         |
| <b>diBr</b> |      | 0.59                                         | 0.22                                               | -0.06                                               | 1.98                                         |

<sup>a</sup> - SOC constant value for the  $^1\text{CT} \rightarrow ^3\text{LE(A)}$  transition calculated in optimized  $^1\text{CT}$  – state geometry;

<sup>b</sup> - inner reorganization energy for  $^1\text{CT} \rightarrow ^3\text{LE(A)}$  transition ( $\lambda_{\text{out}} = 0.05$  eV);

<sup>c</sup> - energy gap from **Table 1**;

<sup>d</sup> -predicted constant rate calculated using equation (S12).

**Table S8.** Computational data for prediction  $^1\text{CT} \rightarrow ^3\text{LE(D)}$  transition.

| $^1\text{CT} \rightarrow ^3\text{LE(D)}$ |      | Mean $^1\text{CT}$ values |                   |                   |                   |                                              |                                                    |                                                     |                                              |
|------------------------------------------|------|---------------------------|-------------------|-------------------|-------------------|----------------------------------------------|----------------------------------------------------|-----------------------------------------------------|----------------------------------------------|
|                                          |      | $^1\text{CT}$             |                   | $^3\text{LE(D)}$  |                   | $V_{1\text{CT} \rightarrow 3\text{LE(D)}}^d$ | $\lambda_{1\text{CT} \rightarrow 3\text{LE(D)}}^e$ | $\Delta E_{1\text{CT} \rightarrow 3\text{LE(D)}}^f$ | $k_{1\text{CT} \rightarrow 3\text{LE(D)}}^i$ |
|                                          |      | [nm] <sup>a</sup>         | [eV] <sup>b</sup> | [nm] <sup>c</sup> | [eV] <sup>b</sup> | [cm <sup>-1</sup> ]                          | [eV]                                               | [eV]                                                | 10 <sup>7</sup> [s <sup>-1</sup> ]           |
| <b>H</b>                                 | ZNX  | 423                       | 2.93              | 392               | 3.16              | 0.70                                         | 0.23                                               | 0.23                                                | 0.016                                        |
| <b>diCl</b>                              |      | 418                       | 2.97              | 410               | 3.02              | 1.20                                         | 0.24                                               | 0.06                                                | 0.880                                        |
| <b>diBr</b>                              |      | 421                       | 2.95              | 412               | 3.01              | 3.30                                         | 0.28                                               | 0.06                                                | 6.122                                        |
| <b>H</b>                                 | PMMA | 430                       | 2.88              | 392               | 3.16              | 0.70                                         | 0.23                                               | 0.28                                                | 0.0003                                       |
| <b>diCl</b>                              |      | 437                       | 2.90              | 410               | 3.02              | 1.20                                         | 0.24                                               | 0.12                                                | 0.177                                        |
| <b>diBr</b>                              |      | 428                       | 2.89              | 412               | 3.01              | 3.30                                         | 0.28                                               | 0.11                                                | 1.810                                        |

| $^1\text{CT} \rightarrow ^3\text{LE(D)}$ |      | Rotameric $^1\text{CT}$ species in PMMA |                   |                   |                   |                                              |                                                    |                                                     |                                              |
|------------------------------------------|------|-----------------------------------------|-------------------|-------------------|-------------------|----------------------------------------------|----------------------------------------------------|-----------------------------------------------------|----------------------------------------------|
|                                          |      | $^1\text{CT}$                           |                   | $^3\text{LE(D)}$  |                   | $V_{1\text{CT} \rightarrow 3\text{LE(D)}}^d$ | $\lambda_{1\text{CT} \rightarrow 3\text{LE(D)}}^e$ | $\Delta E_{1\text{CT} \rightarrow 3\text{LE(D)}}^f$ | $k_{1\text{CT} \rightarrow 3\text{LE(D)}}^h$ |
|                                          |      | [nm] <sup>g</sup>                       | [eV] <sup>b</sup> | [nm] <sup>c</sup> | [eV] <sup>b</sup> | [cm <sup>-1</sup> ]                          | [eV]                                               | [eV]                                                | 10 <sup>7</sup> [s <sup>-1</sup> ]           |
| <b>H</b>                                 | PMMA | high energy $^1\text{CT}$ species       |                   |                   |                   |                                              |                                                    |                                                     |                                              |
|                                          |      | 419                                     | 2.96              | 392               | 3.16              | 0.70                                         | 0.23                                               | 0.20                                                | 0.005                                        |
|                                          |      | 415                                     | 2.99              | 410               | 3.02              | 1.20                                         | 0.24                                               | 0.03                                                | 1.542                                        |
| <b>diCl</b>                              |      | 416                                     | 2.99              | 412               | 3.01              | 3.30                                         | 0.28                                               | 0.02                                                | 15.33                                        |
| <b>H</b>                                 | PMMA | low energy $^1\text{CT}$ species        |                   |                   |                   |                                              |                                                    |                                                     |                                              |
|                                          |      | 442                                     | 2.80              | 392               | 3.16              | 0.70                                         | 0.23                                               | 0.36                                                | 0.0001                                       |
|                                          |      | 439                                     | 2.83              | 410               | 3.02              | 1.20                                         | 0.24                                               | 0.20                                                | 0.016                                        |
| <b>diBr</b>                              |      | 440                                     | 2.82              | 412               | 3.01              | 3.30                                         | 0.28                                               | 0.19                                                | 0.173                                        |

<sup>a</sup> - experimentally determined from steady-state PL spectra. **Figure S6**;<sup>b</sup> - energies calculated from relation:  $E = 1240/\lambda_{\text{onset}}$ ;<sup>c</sup> - experimentally determined from phosphorescence spectra of donor fragments (**Figures S6H**);<sup>d</sup> - SOC values for the  $^1\text{CT} \rightarrow ^3\text{LE(D)}$  transition calculated for the optimized  $^1\text{CT}$ -state geometry;<sup>e</sup> - inner reorganization energy for  $^1\text{CT} \rightarrow ^3\text{LE(D)}$  transition,  $\lambda_{\text{out}} = 0.05$  eV;<sup>f</sup> - energy gap determined from the difference of respective onsets of PL spectra:  $\Delta E_{1-2} = (1240/\lambda_{\text{onset1}} - 1240/\lambda_{\text{onset2}})$ ;<sup>g</sup> - determined from time-dependend PL spectra (see **Figure S11** and **Table S2**);<sup>h</sup> - predicted constant rates calculated from equation (S12).

**Table S9.** Summary of predicted ISC constant rates.

|                                     | Theoretical |                              |                                  |                              |                                  |                                                                                              | Experimental    |
|-------------------------------------|-------------|------------------------------|----------------------------------|------------------------------|----------------------------------|----------------------------------------------------------------------------------------------|-----------------|
| cmpd                                |             | $k_{1CT \rightarrow 3LE(A)}$ | $\mu_{1CT \rightarrow 3LE(A)}^a$ | $k_{1CT \rightarrow 3LE(D)}$ | $\mu_{1CT \rightarrow 3LE(D)}^a$ | $\frac{k_{1CT \rightarrow 3LE(A)} + k_{1CT \rightarrow 3LE(D)}}{k_{1CT \rightarrow 3LE(D)}}$ | $k_{ISC}$       |
|                                     |             | $10^7 [s^{-1}]$              | [%]                              | $10^7 [s^{-1}]$              | [%]                              | $10^7 [s^{-1}]$                                                                              | $10^7 [s^{-1}]$ |
|                                     |             |                              |                                  |                              |                                  |                                                                                              |                 |
| <b>H</b>                            | ZNX         | 6.69                         | 100                              | 0.016                        | 0                                | 6.7                                                                                          | 5.1             |
| <b>diCl</b>                         |             | 6.45                         | 88                               | 0.880                        | 12                               | 7.3                                                                                          | 6.1             |
| <b>diBr</b>                         |             | 4.27                         | 41                               | 6.122                        | 59                               | 10.4                                                                                         | 38.5            |
| <b>H</b>                            | PMMA        | 3.41                         | 100                              | 0.0003                       | 0                                | 3.4                                                                                          | 3.8             |
| <b>diCl</b>                         |             | 3.12                         | 95                               | 0.177                        | 5                                | 3.3                                                                                          | 4.1             |
| <b>diBr</b>                         |             | 1.98                         | 52                               | 1.810                        | 48                               | 3.5                                                                                          | 30.8            |
| high energy <sup>1</sup> CT species |             |                              |                                  |                              |                                  |                                                                                              |                 |
| <b>H</b>                            | PMMA        | 9.19                         | 100                              | 0.005                        | 0                                | 9.2                                                                                          | 3.8             |
| <b>diCl</b>                         |             | 7.61                         | 83                               | 1.542                        | 17                               | 9.1                                                                                          | 4.1             |
| <b>diBr</b>                         |             | 6.44                         | 30                               | 15.33                        | 70                               | 21.8                                                                                         | 30.8            |
| low energy <sup>1</sup> CT species  |             |                              |                                  |                              |                                  |                                                                                              |                 |
| <b>H</b>                            | PMMA        | 0.80                         | 100                              | 0.0001                       | 0                                | 0.8                                                                                          | 3.8             |
| <b>diCl</b>                         |             | 0.84                         | 99                               | 0.016                        | 1                                | 0.8                                                                                          | 4.1             |
| <b>diBr</b>                         |             | 0.52                         | 75                               | 0.173                        | 25                               | 0.7                                                                                          | 30.8            |

<sup>a</sup> - Relative contributions for respective transitions calculated as follows:  $\mu_{1CT \rightarrow 3LE(A)} = 100\% \cdot k_{1CT \rightarrow 3LE(A)} /$

$(k_{1CT \rightarrow 3LE(A)} + k_{1CT \rightarrow 3LE(D)})$  and  $\mu_{1CT \rightarrow 3LE(D)} = 100\% \cdot k_{1CT \rightarrow 3LE(D)} / (k_{1CT \rightarrow 3LE(A)} + k_{1CT \rightarrow 3LE(D)})$

**Calculations for rISC rate constants.** rISC constant rates were calculated using Marcus-Hush formula (S12), computationally predicted  $\lambda$  values and experimentally determined  $\Delta E_{ST}$  values. Due to the coexistence of excited molecules in various triplet states, their contribution to the rISC transition was considered as proportional to the population of respective triplet states (**Table S10**).

*Determination of population of lowest triplet excited states*

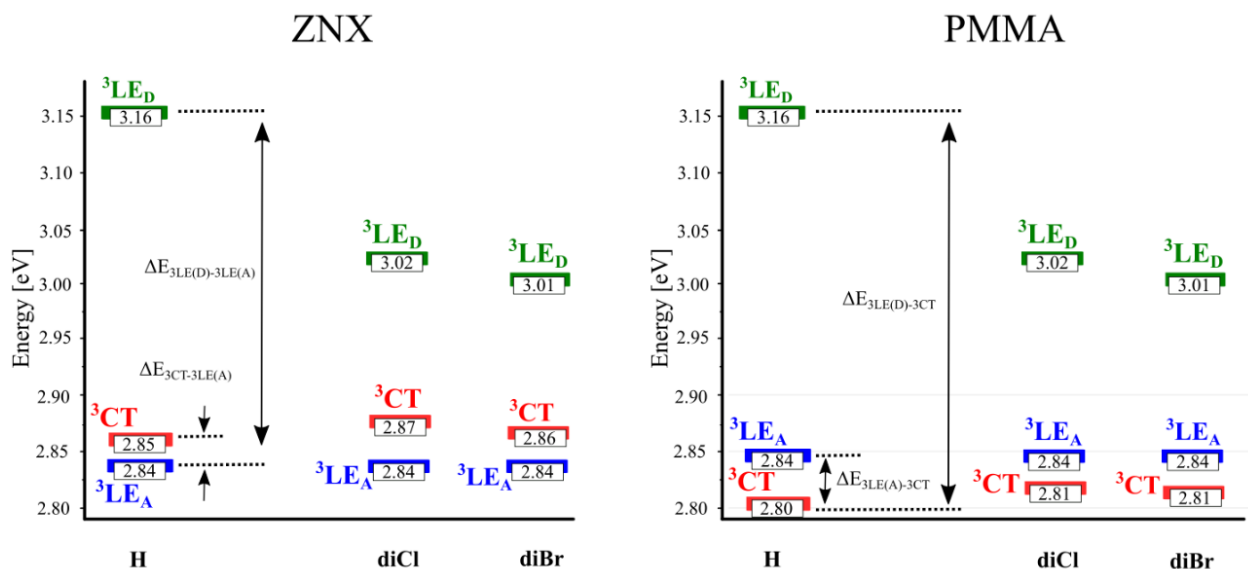

**Figure S16.** Alignment of the excited triplet states of investigated emitters.

Relative population  $\chi_i$  of lowest triplet excited states was determined using Boltzmann distribution law:

$$\chi_i = \frac{\exp\left(-\frac{\Delta E_i}{k_B T}\right)}{\sum_{i=1}^N \exp\left(-\frac{\Delta E_i}{k_B T}\right)}, \quad (\text{S22})$$

where  $\Delta E_i$  denotes the energy difference between lowest triplet state ( $T_1$ ) and respective triplet state ( $T_i$ ):

$$\Delta E_i = (T_i - T_1), \quad (\text{S23})$$

$$a_i = \exp\left(-\frac{(T_i - T_1)}{k_B T}\right). \quad (\text{S24})$$

**Table S10.** Population of lowest triplet excited states of emitters in ZNX and PMMA.

| ZNX                                  |                        |                        |                                     |                             |                             |                |                |                |                            |                         |                            |
|--------------------------------------|------------------------|------------------------|-------------------------------------|-----------------------------|-----------------------------|----------------|----------------|----------------|----------------------------|-------------------------|----------------------------|
| Alignment of triplet excited states: |                        |                        | T <sub>3</sub> = <sup>3</sup> LE(D) |                             |                             |                |                |                |                            |                         |                            |
|                                      |                        |                        | T <sub>2</sub> = <sup>3</sup> CT    |                             |                             |                |                |                |                            |                         |                            |
|                                      |                        |                        | T <sub>1</sub> = <sup>3</sup> LE(A) |                             |                             |                |                |                | <sup>3</sup> LE(A)         | <sup>3</sup> CT         | <sup>3</sup> LE(D)         |
|                                      | T <sub>1</sub><br>[eV] | T <sub>2</sub><br>[eV] | T <sub>3</sub><br>[eV]              | ΔE <sub>T2-T1</sub><br>[eV] | ΔE <sub>T3-T1</sub><br>[eV] | a <sub>1</sub> | a <sub>2</sub> | a <sub>3</sub> | χ <sub>3LE(A)</sub><br>[%] | χ <sub>3CT</sub><br>[%] | χ <sub>3LE(D)</sub><br>[%] |
| <b>H</b>                             | 2.84                   | 2.85                   | 3.16                                | 0.01                        | 0.32                        | 1              | 0.55           | <0.0001        | 64.6                       | 35.4                    | <0.001                     |
| <b>diCl</b>                          | 2.84                   | 2.87                   | 3.02                                | 0.03                        | 0.18                        | 1              | 0.35           | 0.00061        | 74.0                       | 25.9                    | 0.045                      |
| <b>diBr</b>                          | 2.84                   | 2.86                   | 3.01                                | 0.02                        | 0.17                        | 1              | 0.43           | 0.00092        | 69.6                       | 30.3                    | 0.064                      |

  

| PMMA                                 |                        |                        |                                     |                             |                             |                |                |                |                         |                            |                            |
|--------------------------------------|------------------------|------------------------|-------------------------------------|-----------------------------|-----------------------------|----------------|----------------|----------------|-------------------------|----------------------------|----------------------------|
| Alignment of triplet excited states: |                        |                        | T <sub>3</sub> = <sup>3</sup> LE(D) |                             |                             |                |                |                |                         |                            |                            |
|                                      |                        |                        | T <sub>2</sub> = <sup>3</sup> LE(A) |                             |                             |                |                |                |                         |                            |                            |
|                                      |                        |                        | T <sub>1</sub> = <sup>3</sup> CT    |                             |                             |                |                |                | <sup>3</sup> CT         | <sup>3</sup> LE(A)         | <sup>3</sup> LE(D)         |
|                                      | T <sub>1</sub><br>[eV] | T <sub>2</sub><br>[eV] | T <sub>3</sub><br>[eV]              | ΔE <sub>T2-T1</sub><br>[eV] | ΔE <sub>T3-T1</sub><br>[eV] | a <sub>1</sub> | a <sub>2</sub> | a <sub>3</sub> | χ <sub>3CT</sub><br>[%] | χ <sub>3LE(A)</sub><br>[%] | χ <sub>3LE(D)</sub><br>[%] |
| <b>H</b>                             | 2.80                   | 2.84                   | 3.16                                | 0.04                        | 0.36                        | 1              | 0.23           | <0.001         | 81.7                    | 18.3                       | <0.001                     |
| <b>diCl</b>                          | 2.81                   | 2.84                   | 3.02                                | 0.03                        | 0.21                        | 1              | 0.36           | 0.0002         | 73.1                    | 26.9                       | 0.017                      |
| <b>diBr</b>                          | 2.81                   | 2.84                   | 3.01                                | 0.03                        | 0.20                        | 1              | 0.36           | 0.0003         | 73.1                    | 26.9                       | 0.029                      |

**Table S11.** Computational data for rISC constant rate prediction within <sup>3</sup>LE(A)→<sup>1</sup>CT and <sup>3</sup>LE(D)→<sup>1</sup>CT transitions.

| <sup>3</sup> LE(A) → <sup>1</sup> CT |      |                                      |                                      |                                       |                                  |                                      |                                                          |
|--------------------------------------|------|--------------------------------------|--------------------------------------|---------------------------------------|----------------------------------|--------------------------------------|----------------------------------------------------------|
|                                      |      | V <sub>3LE(A)→1CT</sub> <sup>a</sup> | λ <sub>3LE(A)→1CT</sub> <sup>b</sup> | ΔE <sub>3LE(A)-1CT</sub> <sup>c</sup> | χ <sub>3LE(A)</sub> <sup>d</sup> | k <sub>3LE(A)→1CT</sub> <sup>e</sup> | χ <sub>3LE(A)</sub> k <sub>3LE(A)→1CT</sub> <sup>f</sup> |
|                                      |      | [cm <sup>-1</sup> ]                  | [eV]                                 | [eV]                                  | [%]                              | [s <sup>-1</sup> ]                   | [s <sup>-1</sup> ]                                       |
| <b>H</b>                             | ZNX  | 0.24                                 | 0.17                                 | 0.09                                  | 64                               | 3.2 x 10 <sup>5</sup>                | 2.0 x 10 <sup>5</sup>                                    |
| <b>diCl</b>                          |      | 0.51                                 | 0.16                                 | 0.13                                  | 74                               | 5.2 x 10 <sup>5</sup>                | 3.9 x 10 <sup>5</sup>                                    |
| <b>diBr</b>                          |      | 0.24                                 | 0.22                                 | 0.11                                  | 69                               | 1.3 x 10 <sup>5</sup>                | 8.3 x 10 <sup>4</sup>                                    |
| <b>H</b>                             | PMMA | 0.24                                 | 0.17                                 | 0.05                                  | 18                               | 1.1 x 10 <sup>6</sup>                | 1.9 x 10 <sup>5</sup>                                    |
| <b>diCl</b>                          |      | 0.51                                 | 0.16                                 | 0.07                                  | 27                               | 3.8 x 10 <sup>6</sup>                | 1.0 x 10 <sup>6</sup>                                    |
| <b>diBr</b>                          |      | 0.24                                 | 0.22                                 | 0.06                                  | 27                               | 4.8 x 10 <sup>5</sup>                | 1.3 x 10 <sup>5</sup>                                    |

  

| <sup>3</sup> LE(D) → <sup>1</sup> CT |      |                                      |                                      |                                       |                                  |                                      |                                                          |
|--------------------------------------|------|--------------------------------------|--------------------------------------|---------------------------------------|----------------------------------|--------------------------------------|----------------------------------------------------------|
|                                      |      | V <sub>3LE(D)→1CT</sub> <sup>a</sup> | λ <sub>3LE(D)→1CT</sub> <sup>b</sup> | ΔE <sub>3LE(D)-1CT</sub> <sup>c</sup> | χ <sub>3LE(D)</sub> <sup>d</sup> | k <sub>3LE(D)→1CT</sub> <sup>e</sup> | χ <sub>3LE(D)</sub> k <sub>3LE(D)→1CT</sub> <sup>f</sup> |
|                                      |      | [cm <sup>-1</sup> ]                  | [eV]                                 | [eV]                                  | [%]                              | [s <sup>-1</sup> ]                   | [s <sup>-1</sup> ]                                       |
| <b>H</b>                             | ZNX  | 0.70                                 | 0.23                                 | 0.23                                  | 0.01                             | 1.6 x 10 <sup>4</sup>                | 1.6 x 10 <sup>0</sup>                                    |
| <b>diCl</b>                          |      | 1.21                                 | 0.24                                 | 0.05                                  | 0.05                             | 8.9 x 10 <sup>6</sup>                | 4.5 x 10 <sup>3</sup>                                    |
| <b>diBr</b>                          |      | 3.10                                 | 0.28                                 | 0.06                                  | 0.10                             | 5.4 x 10 <sup>7</sup>                | 5.4 x 10 <sup>4</sup>                                    |
| <b>H</b>                             | PMMA | 0.70                                 | 0.23                                 | 0.28                                  | 0.01                             | 3.2 x 10 <sup>3</sup>                | 3.2 x 10 <sup>-1</sup>                                   |
| <b>diCl</b>                          |      | 1.21                                 | 0.24                                 | 0.12                                  | 0.02                             | 1.8 x 10 <sup>6</sup>                | 3.6 x 10 <sup>2</sup>                                    |
| <b>diBr</b>                          |      | 3.10                                 | 0.28                                 | 0.11                                  | 0.03                             | 1.6 x 10 <sup>7</sup>                | 4.8 x 10 <sup>3</sup>                                    |

<sup>a</sup> - SOC values for the <sup>3</sup>LE(A) → <sup>1</sup>CT transition calculated in optimized <sup>3</sup>LE(A) – state geometry and for<sup>3</sup>LE(D) → <sup>1</sup>CT transition calculated in optimized <sup>3</sup>LE(D) – state geometry, respectively;<sup>b</sup> - reorganization energies for the <sup>3</sup>LE(A) → <sup>1</sup>CT and <sup>3</sup>LE(D) → <sup>1</sup>CT transitions, respectively;<sup>c</sup> - energy gap between <sup>3</sup>LE(A), <sup>3</sup>LE(D) and <sup>1</sup>CT states (see **Table S1**);<sup>d</sup> - estimated population of <sup>3</sup>LE(A) and <sup>3</sup>LE(D) triplet states (see **Table S10**);<sup>e</sup> - calculated rISC rate constant using equation (S12);<sup>f</sup> - calculated rISC constant rates corrected on population of respective excited triplet states.

## Section S6: Computational details for the prediction of rISC rate constant within rotational model via direct <sup>3</sup>CT-<sup>1</sup>CT transition

Within the rotational model, the total  $k_{3CT \rightarrow 1CT}$  consists of fractional rate constant  $k_{3CT \rightarrow 1CT}[\theta_i]$ , originating from various  $\theta$ -rotamers (as depicted in **Figures 1B** and **1F**):

$$k_{3CT \rightarrow 1CT} = \sum_{i=1}^n p[\theta_i] \cdot k_{3CT \rightarrow 1CT}[\theta_i] \quad (S25)$$

where:

- $p[\theta_i]$  - molar fraction of  $i$ -th rotamer with  $\theta$  dihedral angle between donor and acceptor (**Figure 1B**) within Boltzmann distribution function,
- $n$  is the number of considered rotamers;
- $k_{3CT \rightarrow 1CT}[\theta_i]$  - fractional rate constant, calculated using Marcus-Hush equation as follows:

$$k_{3CT \rightarrow 1CT}[\theta_i] = \frac{(V_{3CT \rightarrow 1CT}[\theta_i])^2}{\hbar} \sqrt{\frac{\pi}{k_B T \lambda_{3CT \rightarrow 1CT}[\theta_i]}} \exp \left[ -\frac{(\Delta E_{3CT \rightarrow 1CT}[\theta_i] + \lambda_{3CT \rightarrow 1CT}[\theta_i])^2}{4k_B T \lambda_{3CT \rightarrow 1CT}[\theta_i]} \right] \quad (S26)$$

where:

- $V_{3CT \rightarrow 1CT}[\theta_i]$  - SOC constant calculated for  $i$ -th rotamer with  $\theta$  dihedral angle at the <sup>3</sup>CT-state geometry,
- $\lambda_{3CT \rightarrow 1CT}[\theta_i]$  - reorganization energy,
- $\Delta E_{3CT \rightarrow 1CT}[\theta_i]$  - energy gap between <sup>1</sup>CT and <sup>3</sup>CT states of  $i$ -th rotamer with  $\theta$  dihedral angle,
- $k_B$  is Boltzmann constant ( $k_B = 8.617 \times 10^{-5}$  eV/K),
- $T$  - temperature (for all of calculations  $T = 298$  K).

Reorganization energy  $\lambda_{3CT \rightarrow 1CT}[\theta_i]$  consists of two terms (inner  $\lambda_{3CT \rightarrow 1CT}^{\text{in}}[\theta_i]$  and outer  $\lambda_{3CT \rightarrow 1CT}^{\text{out}}$ ):

$$\lambda_{3CT \rightarrow 1CT}[\theta_i] = \lambda_{3CT \rightarrow 1CT}^{\text{in}}[\theta_i] + \lambda_{3CT \rightarrow 1CT}^{\text{out}} \quad (S27)$$

The first term  $\lambda_{3CT \rightarrow 1CT}^{\text{in}}[\theta_i]$  refers to the energy that is dissipated by molecule during relaxation to the equilibrium geometry in a given state.

It can be calculated using the formula:

$$\lambda_{3\text{CT} \rightarrow 1\text{CT}}^{\text{in}}[\theta_i] = E_{3\text{CT}}^{1\text{CT}}[\theta_i] - E_{1\text{CT}}^{1\text{CT}}, \quad (\text{S28})$$

where:

- $E_{3\text{CT}}^{1\text{CT}}[\theta_i]$  - TD-DFT energy of  $^1\text{CT}$  state at  $^3\text{CT}$ -state geometry calculated for  $i$ -th rotamer with  $\theta$  dihedral angle,
- $E_{1\text{CT}}^{1\text{CT}}$  - TD-DFT energy of  $^1\text{CT}$  state at optimized  $^1\text{CT}$ -state geometry.

The second term  $\lambda_{3\text{CT} \rightarrow 1\text{CT}}^{\text{out}}$  is a measure of solvation effects, and in case of interaction between excited states with the same nature (CT) it can be approximated as follows:

$$\lambda_{3\text{CT} \rightarrow 1\text{CT}}^{\text{out}} \approx \Delta E_{3\text{CT}-1\text{CT}}[\theta_i]. \quad (\text{S29})$$

Boltzmann distribution law was used to estimate relative population of rotamers  $p[\theta_i]$ :

$$p[\theta_i] = Z^{-1} \cdot \exp\left(-\frac{\Delta E[\theta_i]}{k_B T}\right), \quad (\text{S30})$$

$$\Delta E[\theta_i] = E[\theta_i] - E_{1\text{CT}}^{1\text{CT}}, \quad (\text{S31})$$

$$Z = \sum_{i=1}^n \exp\left(-\frac{\Delta E[\theta_i]}{k_B T}\right), \quad (\text{S32})$$

where:

- $E[\theta_i]$  – energy calculated for  $i$ -th rotamer with  $\theta$  dihedral angle,
- $E_{1\text{CT}}^{1\text{CT}}$  - energy at optimized  $^1\text{CT}$ - state geometry.

Below, complete set of computed parameters for prediction of  $k_{3\text{CT} \rightarrow 1\text{CT}}$  in **H**, **diCl** and **diBr** within developed rotational model is presented (**Tables S12 – S14** and **Figures S17 – S19**).

**Table S12.** Computational parameters for  $k_{3CT \rightarrow 1CT}$  prediction in **H** using rotational model.

| Computational parameters for the prediction of $k_{3CT \rightarrow 1CT}$ in <b>H</b> |                      |               |                                            |                                     |                                           |                                     |                                                       |
|--------------------------------------------------------------------------------------|----------------------|---------------|--------------------------------------------|-------------------------------------|-------------------------------------------|-------------------------------------|-------------------------------------------------------|
| $\theta_i$                                                                           | $\Delta E[\theta_i]$ | $p[\theta_i]$ | $\Delta E_{3CT \rightarrow 1CT}[\theta_i]$ | $V_{3CT \rightarrow 1CT}[\theta_i]$ | $\lambda_{3CT \rightarrow 1CT}[\theta_i]$ | $k_{3CT \rightarrow 1CT}[\theta_i]$ | $p[\theta_i] \cdot k_{3CT \rightarrow 1CT}[\theta_i]$ |
| [°]                                                                                  | [meV]                | [%]           | [meV]                                      | [cm <sup>-1</sup> ]                 | [meV]                                     | 10 <sup>4</sup> [s <sup>-1</sup> ]  | 10 <sup>4</sup> [s <sup>-1</sup> ]                    |
| 90                                                                                   | 0.0                  | 4.1           | 4.7                                        | 0                                   | 0.0                                       | 0.0                                 | 0.000                                                 |
| 89                                                                                   | 0.2                  | 4.1           | 4.8                                        | 0.01                                | 0.3                                       | 0.1                                 | 0.004                                                 |
| 88                                                                                   | 0.5                  | 4.0           | 5.5                                        | 0.02                                | 1.3                                       | 0.3                                 | 0.025                                                 |
| 87                                                                                   | 1.0                  | 3.9           | 6.6                                        | 0.03                                | 3.0                                       | 1.5                                 | 0.057                                                 |
| 86                                                                                   | 1.7                  | 3.8           | 8.3                                        | 0.04                                | 5.3                                       | 2.5                                 | 0.095                                                 |
| 85                                                                                   | 2.6                  | 3.7           | 10.4                                       | 0.05                                | 8.4                                       | 2.9                                 | 0.134                                                 |
| 84                                                                                   | 3.9                  | 3.5           | 13.1                                       | 0.05                                | 12.3                                      | 4.7                                 | 0.125                                                 |
| 83                                                                                   | 5.5                  | 3.3           | 16.2                                       | 0.06                                | 16.9                                      | 4.9                                 | 0.159                                                 |
| 82                                                                                   | 7.4                  | 3.1           | 19.6                                       | 0.06                                | 22.3                                      | 5.0                                 | 0.112                                                 |
| 81                                                                                   | 9.6                  | 2.8           | 23.7                                       | 0.07                                | 28.5                                      | 5.5                                 | 0.119                                                 |
| 80                                                                                   | 12.1                 | 2.6           | 28.1                                       | 0.08                                | 35.4                                      | 5.8                                 | 0.118                                                 |
| 79                                                                                   | 14.9                 | 2.3           | 33.1                                       | 0.09                                | 43.1                                      | 5.9                                 | 0.110                                                 |
| 78                                                                                   | 18.1                 | 2.0           | 38.3                                       | 0.10                                | 51.6                                      | 5.8                                 | 0.096                                                 |
| 77                                                                                   | 21.7                 | 1.8           | 44.0                                       | 0.11                                | 60.8                                      | 5.4                                 | 0.080                                                 |
| 76                                                                                   | 25.7                 | 1.5           | 50.2                                       | 0.12                                | 70.9                                      | 4.2                                 | 0.063                                                 |
| 75                                                                                   | 30.2                 | 1.3           | 56.5                                       | 0.13                                | 81.7                                      | 3.8                                 | 0.048                                                 |
| 74                                                                                   | 35.1                 | 1.0           | 63.3                                       | 0.14                                | 93.4                                      | 3.3                                 | 0.034                                                 |
| 73                                                                                   | 40.5                 | 0.8           | 70.5                                       | 0.15                                | 105.9                                     | 2.8                                 | 0.024                                                 |
| 72                                                                                   | 46.5                 | 0.7           | 77.9                                       | 0.16                                | 119.2                                     | 2.1                                 | 0.016                                                 |
| 71                                                                                   | 52.9                 | 0.5           | 85.6                                       | 0.16                                | 133.4                                     | 1.7                                 | 0.009                                                 |
| 70                                                                                   | 60.0                 | 0.4           | 93.6                                       | 0.16                                | 148.4                                     | 1.2                                 | 0.005                                                 |
| 69                                                                                   | 67.8                 | 0.3           | 101.7                                      | 0.16                                | 164.2                                     | 0.8                                 | 0.002                                                 |
| 68                                                                                   | 76.3                 | 0.2           | 110.2                                      | 0.16                                | 181.2                                     | 0.6                                 | 0.001                                                 |
| 67                                                                                   | 85.7                 | 0.1           | 118.3                                      | 0.17                                | 199.2                                     | 0.4                                 | 0.001                                                 |
| 66                                                                                   | 95.9                 | 0.1           | 127.8                                      | 0.17                                | 218.2                                     | 0.3                                 | 0.000                                                 |
| 65                                                                                   | 107.0                | 0.1           | 136.8                                      | 0.17                                | 238.3                                     | 0.3                                 | 0.000                                                 |
| 64                                                                                   | 119.1                | 0.0           | 145.9                                      | 0.18                                | 259.4                                     | 0.2                                 | 0.000                                                 |
| 63                                                                                   | 132.2                | 0.0           | 155.3                                      | 0.18                                | 281.2                                     | 0.1                                 | 0.000                                                 |
| 62                                                                                   | 146.5                | 0.0           | 164.7                                      | 0.18                                | 305.4                                     | 0.1                                 | 0.000                                                 |
| 61                                                                                   | 163.4                | 0.0           | 172.6                                      | 0.19                                | 330.2                                     | 0.0                                 | 0.000                                                 |
| 60                                                                                   | 182.4                | 0.0           | 180.1                                      | 0.19                                | 356.5                                     | 0.0                                 | 0.000                                                 |
| Rate constant calculated for <b>H</b> within rotational model                        |                      |               |                                            |                                     | $k_{3CT \rightarrow 1CT}$                 | =                                   | <b>2.81</b> [10 <sup>4</sup> s <sup>-1</sup> ]        |

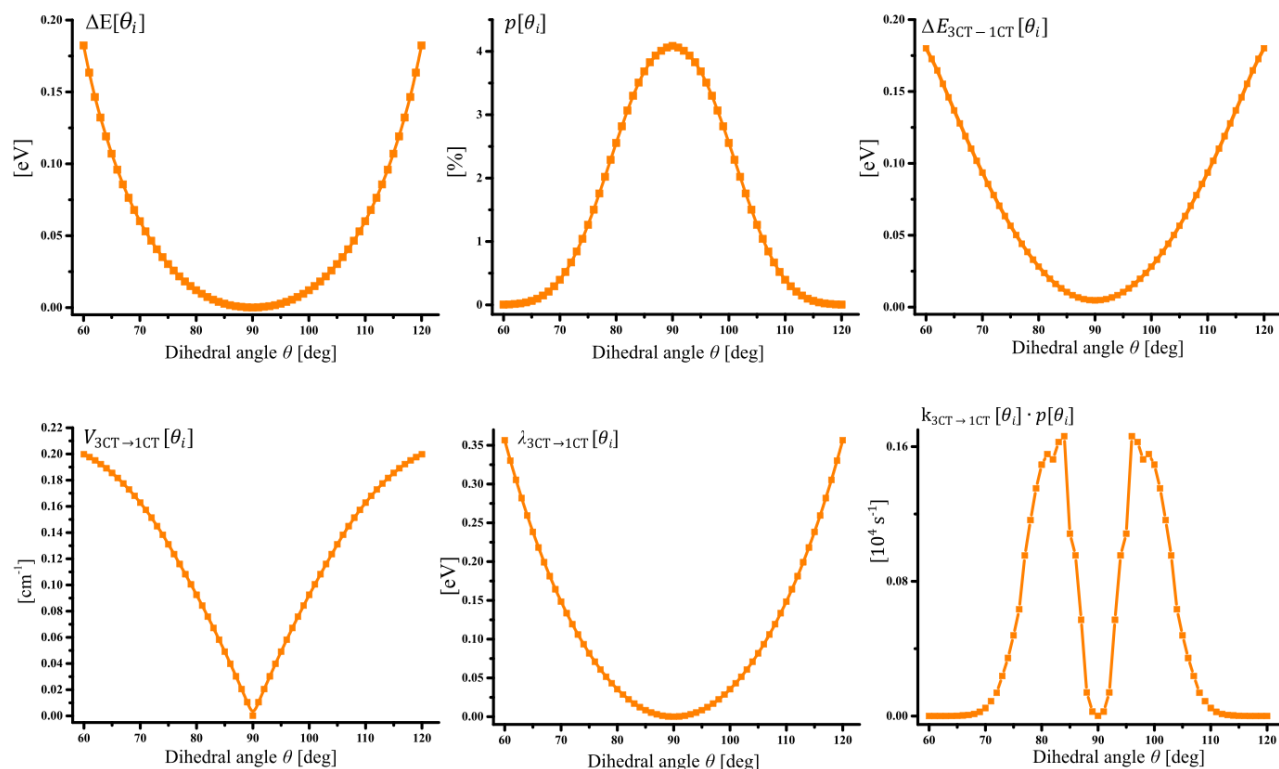**Figure S17.** Computational parameters for the prediction of  $k_{3CT \rightarrow 1CT}$  in **H** calculated within rotational model.

**Table S13.** Computational parameters for  $k_{3CT \rightarrow 1CT}$  prediction in **diCl** using rotational model.

| Computational parameters for prediction $k_{3CT \rightarrow 1CT}$ in <b>diCl</b> |                      |               |                                            |                                     |                                           |                                     |                                                       |
|----------------------------------------------------------------------------------|----------------------|---------------|--------------------------------------------|-------------------------------------|-------------------------------------------|-------------------------------------|-------------------------------------------------------|
| $\theta_i$                                                                       | $\Delta E[\theta_i]$ | $p[\theta_i]$ | $\Delta E_{3CT \rightarrow 1CT}[\theta_i]$ | $V_{3CT \rightarrow 1CT}[\theta_i]$ | $\lambda_{3CT \rightarrow 1CT}[\theta_i]$ | $k_{3CT \rightarrow 1CT}[\theta_i]$ | $p[\theta_i] \cdot k_{3CT \rightarrow 1CT}[\theta_i]$ |
| [°]                                                                              | [meV]                | [%]           | [meV]                                      | [cm <sup>-1</sup> ]                 | [meV]                                     | 10 <sup>4</sup> [s <sup>-1</sup> ]  | 10 <sup>4</sup> [s <sup>-1</sup> ]                    |
| 90                                                                               | 0.0                  | 3.5           | 5.2                                        | 0.00                                | 0.0                                       | 0.0                                 | 0.000                                                 |
| 89                                                                               | 0.4                  | 3.4           | 5.4                                        | 0.01                                | 0.1                                       | 0.1                                 | 0.000                                                 |
| 88                                                                               | 0.7                  | 3.4           | 5.8                                        | 0.01                                | 1.0                                       | 0.5                                 | 0.005                                                 |
| 87                                                                               | 0.9                  | 3.3           | 7.1                                        | 0.02                                | 2.3                                       | 0.6                                 | 0.021                                                 |
| 86                                                                               | 1.2                  | 3.3           | 8.6                                        | 0.03                                | 4.3                                       | 1.3                                 | 0.045                                                 |
| 85                                                                               | 1.8                  | 3.2           | 11.2                                       | 0.04                                | 7.9                                       | 2.3                                 | 0.058                                                 |
| 84                                                                               | 2.6                  | 3.1           | 13.5                                       | 0.05                                | 10.9                                      | 3.2                                 | 0.089                                                 |
| 83                                                                               | 3.4                  | 3.0           | 16.6                                       | 0.05                                | 14.9                                      | 2.9                                 | 0.087                                                 |
| 82                                                                               | 4.5                  | 2.9           | 20.1                                       | 0.06                                | 19.4                                      | 3.6                                 | 0.091                                                 |
| 81                                                                               | 5.8                  | 2.8           | 24.2                                       | 0.06                                | 24.7                                      | 4.2                                 | 0.082                                                 |
| 80                                                                               | 7.4                  | 2.6           | 28.6                                       | 0.07                                | 30.8                                      | 3.5                                 | 0.084                                                 |
| 79                                                                               | 9.3                  | 2.4           | 34.3                                       | 0.07                                | 38.4                                      | 3.7                                 | 0.068                                                 |
| 78                                                                               | 11.5                 | 2.2           | 39.7                                       | 0.08                                | 45.9                                      | 3.0                                 | 0.066                                                 |
| 77                                                                               | 13.9                 | 2.0           | 45.4                                       | 0.08                                | 54.1                                      | 3.0                                 | 0.047                                                 |
| 76                                                                               | 16.7                 | 1.8           | 51.6                                       | 0.09                                | 63.0                                      | 2.3                                 | 0.042                                                 |
| 75                                                                               | 19.9                 | 1.6           | 58.1                                       | 0.09                                | 72.6                                      | 2.2                                 | 0.029                                                 |
| 74                                                                               | 23.4                 | 1.4           | 64.9                                       | 0.09                                | 83.0                                      | 1.7                                 | 0.019                                                 |
| 73                                                                               | 27.4                 | 1.2           | 72.1                                       | 0.09                                | 94.0                                      | 1.3                                 | 0.012                                                 |
| 72                                                                               | 31.8                 | 1.0           | 79.7                                       | 0.10                                | 105.9                                     | 1.1                                 | 0.009                                                 |
| 71                                                                               | 36.7                 | 0.8           | 87.5                                       | 0.11                                | 118.7                                     | 0.8                                 | 0.007                                                 |
| 70                                                                               | 42.2                 | 0.7           | 95.6                                       | 0.11                                | 132.2                                     | 0.6                                 | 0.004                                                 |
| 69                                                                               | 48.4                 | 0.5           | 104.0                                      | 0.12                                | 146.7                                     | 0.4                                 | 0.003                                                 |
| 68                                                                               | 55.2                 | 0.4           | 112.6                                      | 0.13                                | 162.1                                     | 0.3                                 | 0.002                                                 |
| 67                                                                               | 62.8                 | 0.3           | 121.4                                      | 0.14                                | 178.5                                     | 0.2                                 | 0.001                                                 |
| 66                                                                               | 71.2                 | 0.2           | 130.4                                      | 0.13                                | 195.8                                     | 0.1                                 | 0.000                                                 |
| 65                                                                               | 80.6                 | 0.2           | 139.5                                      | 0.14                                | 214.2                                     | 0.1                                 | 0.000                                                 |
| 64                                                                               | 90.8                 | 0.1           | 148.8                                      | 0.14                                | 233.7                                     | 0.1                                 | 0.000                                                 |
| 63                                                                               | 102.2                | 0.1           | 158.4                                      | 0.14                                | 254.5                                     | 0.0                                 | 0.000                                                 |
| 62                                                                               | 114.7                | 0.0           | 167.8                                      | 0.15                                | 276.4                                     | 0.0                                 | 0.000                                                 |
| 61                                                                               | 128.5                | 0.0           | 177.7                                      | 0.15                                | 299.8                                     | 0.0                                 | 0.000                                                 |
| 60                                                                               | 143.8                | 0.0           | 187.4                                      | 0.16                                | 324.8                                     | 0.0                                 | 0.000                                                 |
| Rate constant calculated for <b>diCl</b> within rotational model                 |                      |               |                                            |                                     | $k_{3CT \rightarrow 1CT}$                 | =                                   | <b>1.75</b> [10 <sup>4</sup> s <sup>-1</sup> ]        |

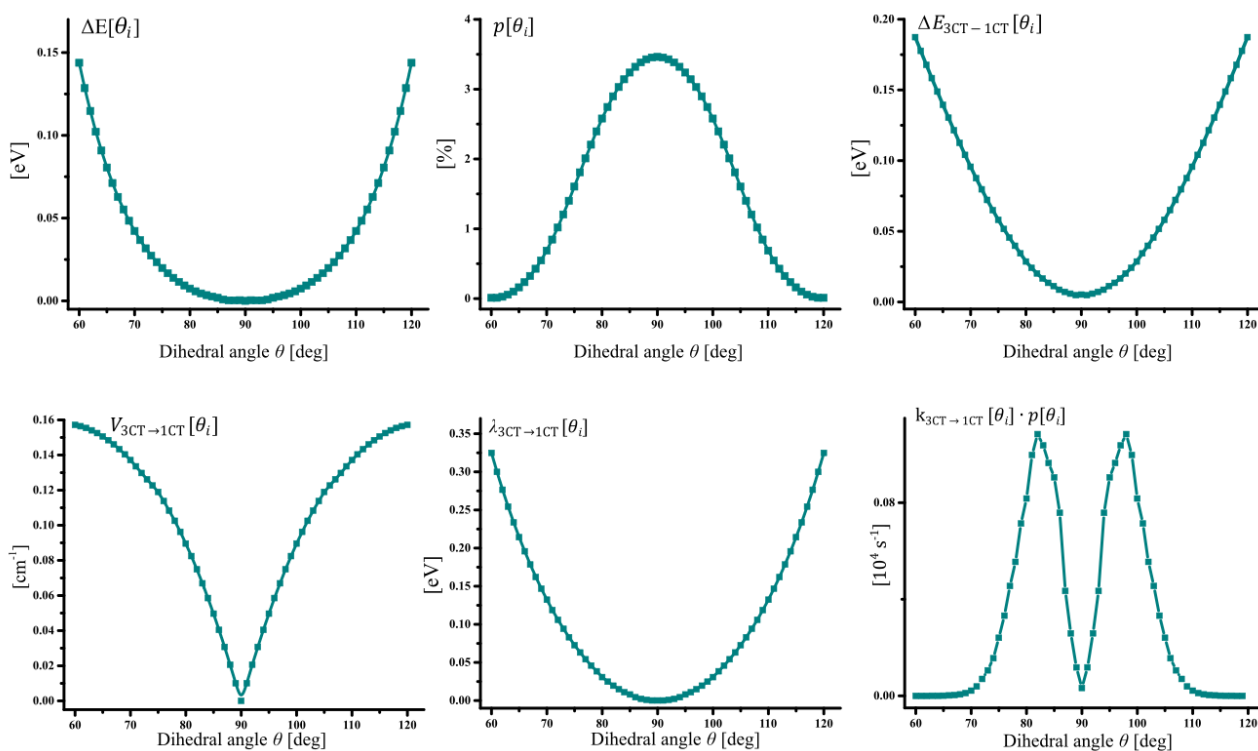**Figure S18.** Computational parameters for prediction  $k_{3CT \rightarrow 1CT}$  in **diCl** calculated within rotational model.

**Table S14** Computational parameters for  $k_{3CT \rightarrow 1CT}$  prediction in **diBr** using rotational model.

| Computational parameters for the prediction of $k_{3CT \rightarrow 1CT}$ in <b>diBr</b> |                      |               |                                |                                     |                                           |                                     |                                                       |
|-----------------------------------------------------------------------------------------|----------------------|---------------|--------------------------------|-------------------------------------|-------------------------------------------|-------------------------------------|-------------------------------------------------------|
| $\theta_i$                                                                              | $\Delta E[\theta_i]$ | $p[\theta_i]$ | $\Delta E_{3CT-1CT}[\theta_i]$ | $V_{3CT \rightarrow 1CT}[\theta_i]$ | $\lambda_{3CT \rightarrow 1CT}[\theta_i]$ | $k_{3CT \rightarrow 1CT}[\theta_i]$ | $p[\theta_i] \cdot k_{3CT \rightarrow 1CT}[\theta_i]$ |
| [°]                                                                                     | [meV]                | [%]           | [meV]                          | [cm <sup>-1</sup> ]                 | [meV]                                     | 10 <sup>4</sup> [s <sup>-1</sup> ]  | 10 <sup>4</sup> [s <sup>-1</sup> ]                    |
| 90                                                                                      | 0.0                  | 3.4           | 4.8                            | 0.00                                | 0.00                                      | 0.00                                | 0.000                                                 |
| 89                                                                                      | 0.0                  | 3.4           | 5.1                            | 0.01                                | 0.00                                      | 0.01                                | 0.009                                                 |
| 88                                                                                      | 0.1                  | 3.4           | 5.8                            | 0.01                                | 0.00                                      | 0.27                                | 0.030                                                 |
| 87                                                                                      | 0.2                  | 3.3           | 6.9                            | 0.02                                | 0.00                                      | 0.87                                | 0.043                                                 |
| 86                                                                                      | 0.4                  | 3.3           | 8.5                            | 0.02                                | 0.00                                      | 1.26                                | 0.039                                                 |
| 85                                                                                      | 0.9                  | 3.3           | 10.8                           | 0.03                                | 0.01                                      | 1.18                                | 0.049                                                 |
| 84                                                                                      | 1.6                  | 3.2           | 13.1                           | 0.03                                | 0.01                                      | 1.50                                | 0.058                                                 |
| 83                                                                                      | 2.7                  | 3.1           | 16.1                           | 0.04                                | 0.01                                      | 1.86                                | 0.056                                                 |
| 82                                                                                      | 4.0                  | 2.9           | 19.5                           | 0.04                                | 0.02                                      | 1.89                                | 0.047                                                 |
| 81                                                                                      | 5.5                  | 2.8           | 23.4                           | 0.05                                | 0.02                                      | 1.70                                | 0.041                                                 |
| 80                                                                                      | 7.3                  | 2.6           | 27.7                           | 0.05                                | 0.03                                      | 1.57                                | 0.037                                                 |
| 79                                                                                      | 9.3                  | 2.4           | 32.4                           | 0.06                                | 0.04                                      | 1.54                                | 0.028                                                 |
| 78                                                                                      | 11.6                 | 2.2           | 37.5                           | 0.06                                | 0.04                                      | 1.26                                | 0.029                                                 |
| 77                                                                                      | 14.1                 | 2.0           | 43.0                           | 0.07                                | 0.05                                      | 1.45                                | 0.020                                                 |
| 76                                                                                      | 16.9                 | 1.8           | 48.9                           | 0.07                                | 0.06                                      | 1.15                                | 0.014                                                 |
| 75                                                                                      | 20.1                 | 1.6           | 55.1                           | 0.08                                | 0.07                                      | 0.89                                | 0.013                                                 |
| 74                                                                                      | 23.5                 | 1.4           | 61.7                           | 0.08                                | 0.08                                      | 0.93                                | 0.008                                                 |
| 73                                                                                      | 27.5                 | 1.2           | 68.6                           | 0.08                                | 0.09                                      | 0.70                                | 0.007                                                 |
| 72                                                                                      | 32.1                 | 1.0           | 75.7                           | 0.09                                | 0.10                                      | 0.68                                | 0.004                                                 |
| 71                                                                                      | 37.3                 | 0.8           | 83.2                           | 0.09                                | 0.12                                      | 0.50                                | 0.002                                                 |
| 70                                                                                      | 43.1                 | 0.6           | 91.0                           | 0.09                                | 0.13                                      | 0.36                                | 0.002                                                 |
| 69                                                                                      | 49.6                 | 0.5           | 98.5                           | 0.10                                | 0.14                                      | 0.33                                | 0.001                                                 |
| 68                                                                                      | 56.7                 | 0.4           | 106.7                          | 0.10                                | 0.16                                      | 0.24                                | 0.001                                                 |
| 67                                                                                      | 64.5                 | 0.3           | 115.2                          | 0.10                                | 0.17                                      | 0.20                                | 0.000                                                 |
| 66                                                                                      | 73.1                 | 0.2           | 123.7                          | 0.11                                | 0.19                                      | 0.17                                | 0.000                                                 |
| 65                                                                                      | 82.5                 | 0.1           | 132.5                          | 0.11                                | 0.21                                      | 0.12                                | 0.000                                                 |
| 64                                                                                      | 92.9                 | 0.1           | 141.4                          | 0.11                                | 0.23                                      | 0.08                                | 0.000                                                 |
| 63                                                                                      | 104.4                | 0.1           | 150.4                          | 0.11                                | 0.25                                      | 0.06                                | 0.000                                                 |
| 62                                                                                      | 117.0                | 0.0           | 159.6                          | 0.11                                | 0.27                                      | 0.04                                | 0.000                                                 |
| 61                                                                                      | 130.8                | 0.0           | 168.8                          | 0.12                                | 0.29                                      | 0.03                                | 0.000                                                 |
| 60                                                                                      | 143.1                | 0.0           | 181.2                          | 0.12                                | 0.32                                      | 0.02                                | 0.000                                                 |
| Rate constant calculated for <b>diBr</b> within rotational model                        |                      |               |                                |                                     | $k_{3CT \rightarrow 1CT}$                 | =                                   | <b>1.08</b> [10 <sup>4</sup> s <sup>-1</sup> ]        |

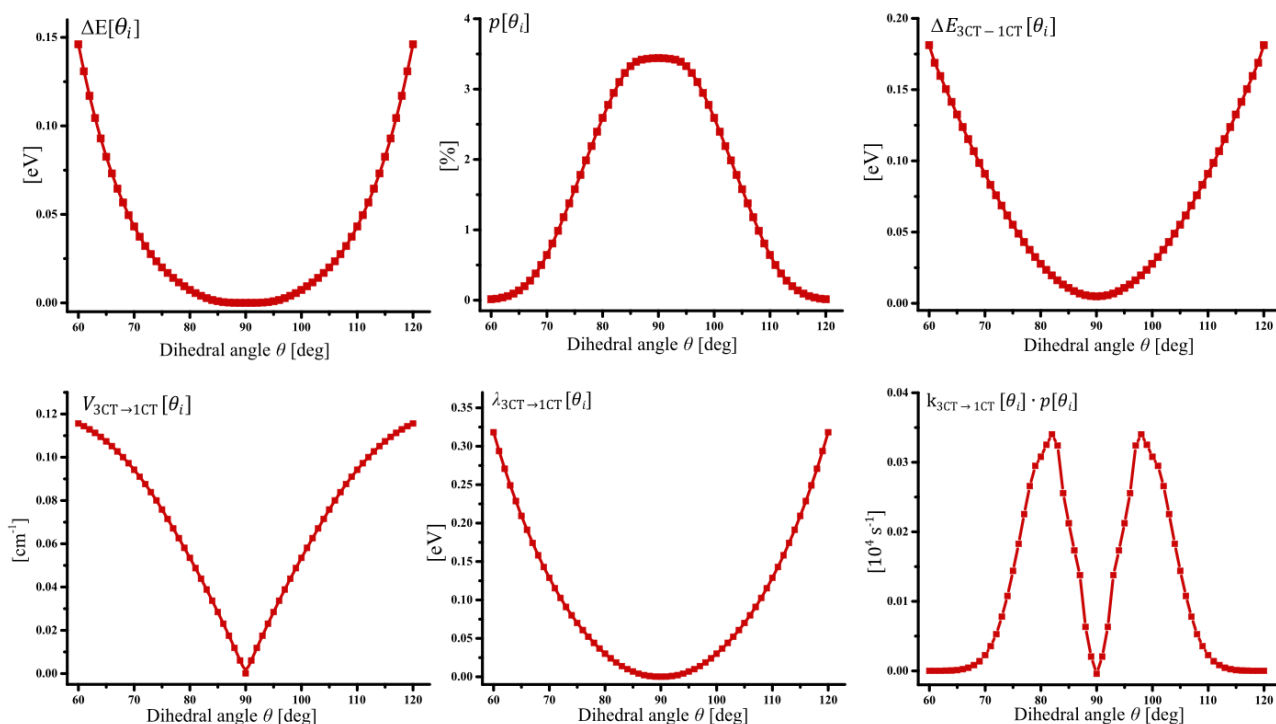**Figure S19.** Computational parameters for the prediction of  $k_{3CT \rightarrow 1CT}$  in **diBr** calculated within rotational model.

The statistically weighted oscillator strengths ( $f$ ) values for all rotamers were calculated according to the procedure reported previously.[S3] Thus obtained  $f$  value slightly increases with the introduction of halogen from 0.016 (**H**) to 0.020 (**diCl** and **diBr**). One can thus suggest that the value of oscillator strength reversely correlates with the CT strength.

## Section S7: Computational details for the prediction of rISC rate constant within the vibrational model via direct $^3\text{CT}$ - $^1\text{CT}$ transition

Within the vibrationally-assisted direct SOC model presented below, total  $k_{3\text{CT} \rightarrow 1\text{CT}}$  consists of fractional constant rates  $k_{3\text{CT} \rightarrow 1\text{CT}}^{\omega_i}$ , originating from one  $\theta$ -rotamer ( $\theta = 90^\circ$ ) at various deviations from optimal geometry induced by low-frequency vibrations ( $< 100 \text{ cm}^{-1}$ ):

$$k_{3\text{CT} \rightarrow 1\text{CT}} = \sum_{i=1}^n k_{3\text{CT} \rightarrow 1\text{CT}}^{\omega_i} \quad (\text{S33})$$

where  $\omega_i$  is  $i$ -th vibrational mode,  $n$  is the number of considered modes (here  $n = 8$ , see **Figure S19**).

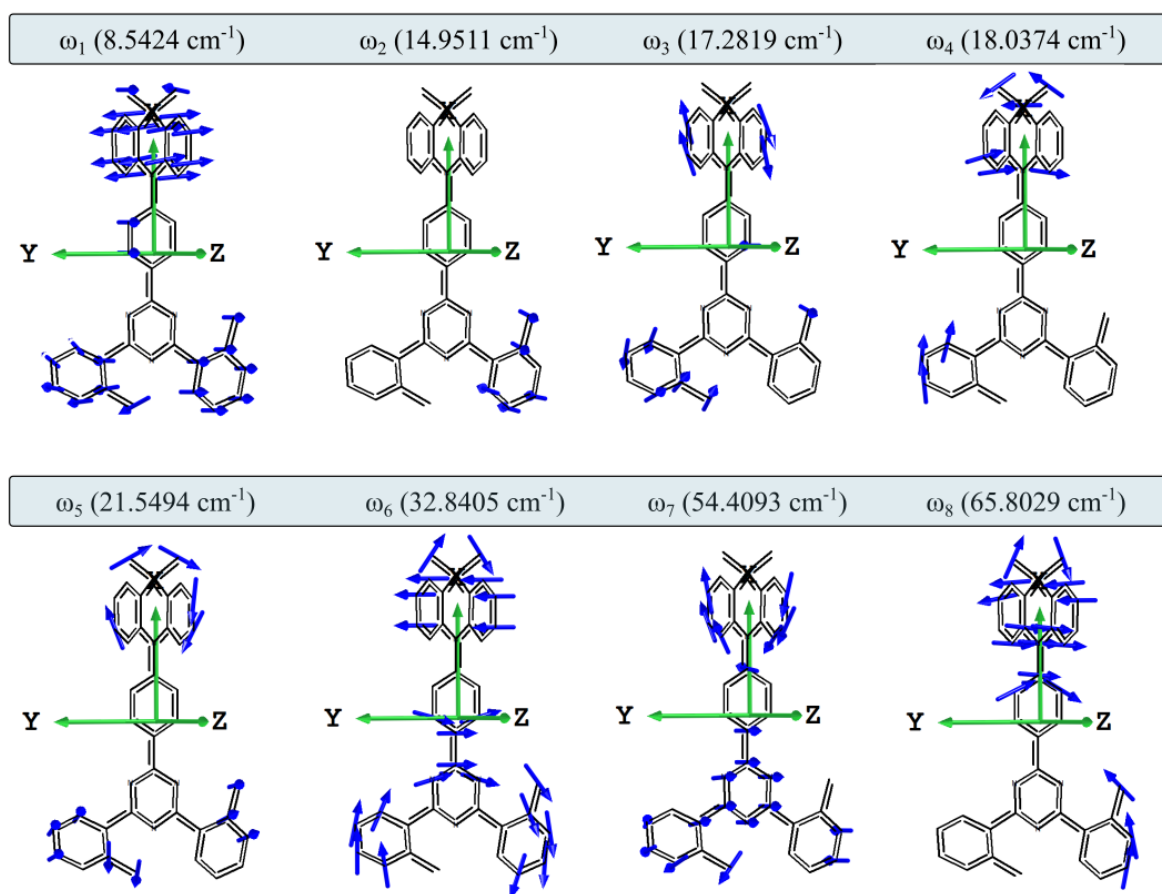

**Figure S20.** Vibrational modes of **H** calculated in  $S_0$ -state geometry with displacement vectors shown.

Single point TD-DFT calculations of energetic and SOC parameters were performed for various modifications of the S<sub>0</sub>-state 90-rotamer structure, in which each vibration was “scanned” by changing its amplitude  $A$  in a  $-2 - +2$  range. Such structures were generated using Chemcraft software, version 1.8. For the  $i$  vibrational mode, fractional constant rate  $k_{3CT \rightarrow 1CT}^{\omega_i}$  was performed taking into account contribution of each vibrational isomer as follows:

$$k_{3CT \rightarrow 1CT}^{\omega_i} = \sum_{j=1}^m k_{\omega_i}[A_j] \cdot p_{\omega_i}[A_j], \quad (S34)$$

where:

- $p_{\omega_i}[A_j]$  - Boltzmann distribution function, molar fraction of  $j$ -th isomer with  $A_j$  amplitude in the  $\omega_i$  vibration,
- $m$  - number of calculated isomers, usually  $m = 29$  unless mentioned differently.
- $k_{\omega_i}[A_j]$  – the <sup>3</sup>CT-<sup>1</sup>CT transition rate constant calculated for the  $j$ -th vibrational isomer using Marcus-Hush equation:

$$k_{\omega_i}[A_j] = \frac{(V_{3CT \rightarrow 1CT}[A_j])^2}{\hbar} \sqrt{\frac{\pi}{k_B T \lambda_{3CT \rightarrow 1CT}[A_j]}} \exp \left[ -\frac{(\Delta E_{3CT \rightarrow 1CT}[A_j] + \lambda_{3CT \rightarrow 1CT}[A_j])^2}{4k_B T \lambda_{3CT \rightarrow 1CT}[A_j]} \right], \quad (S35)$$

where:

- $V_{3CT \rightarrow 1CT}[A_j]$  – SOC constant of the  $j$ -th isomer at the <sup>3</sup>CT-state geometry,
- $\lambda_{3CT \rightarrow 1CT}[A_j]$  – reorganization energy of the  $j$ -th isomer at the <sup>3</sup>CT-state geometry,
- $\Delta E_{3CT \rightarrow 1CT}[A_j]$  – energy gap between <sup>1</sup>CT and <sup>3</sup>CT states in  $j$ -th isomer,
- $k_B$  is Boltzmann constant ( $k_B = 8.617 \times 10^{-5}$  eV/K),
- $T$  – temperature, for all calculations  $T = 298$  K.

Reorganization energy consists of two terms (inner and outer):

$$\lambda_{3CT \rightarrow 1CT}[A_j] = \lambda_{3CT \rightarrow 1CT}^{\text{in}}[A_j] + \lambda_{3CT \rightarrow 1CT}^{\text{out}} \quad (S36)$$

The first term  $\lambda_{3CT \rightarrow 1CT}^{\text{in}}[A_j]$  refers to the energy that is dissipated by the molecule relaxing to the equilibrium geometry at given state. It can be calculated using the formula:

$$\lambda_{3\text{CT}\rightarrow 1\text{CT}}^{\text{in}}[A_j] = E_{3\text{CT},\omega_i}^{1\text{CT}}[A_j] - E_{1\text{CT},\omega_i}^{1\text{CT}}[A_0], \quad (\text{S37})$$

where:

- $E_{3\text{CT},\omega_i}^{1\text{CT}}[A_j]$  – TD-DFT energy of  $^1\text{CT}$  state at  $^3\text{CT}$ -state geometry calculated for  $j$ -th isomer within  $\omega_i$  vibration,
- $E_{1\text{CT},\omega_i}^{1\text{CT}}[A_0]$  – TD-DFT energy of  $^1\text{CT}$  state at optimized ( $A_0$  refers to amplitude = 0)  $^1\text{CT}$ -state geometry calculated within  $\omega_i$  vibration.

The second term  $\lambda_{3\text{CT}\rightarrow 1\text{CT}}^{\text{out}}$  is a measure of solvation effects, and in case of interaction between excited states with the same nature (CT) can be approximated as follows:

$$\lambda_{3\text{CT}\rightarrow 1\text{CT}}^{\text{out}} \approx \Delta E_{3\text{CT}-1\text{CT}}[A_j]. \quad (\text{S38})$$

Boltzmann distribution law was used to estimate relative population of isomers ( $p_{\omega_i}[A_j]$ ), which was calculated for the ground  $S_0$ -state:

$$p_{\omega_i}[A_j] = Z^{-1} \cdot \exp\left(-\frac{\Delta E_{\omega_i}[A_j]}{k_B T}\right) \quad (\text{S39})$$

$$\Delta E_{\omega_i}[A_j] = E_{\omega_i}[A_j] - E[A_0] \quad (\text{S40})$$

$$Z = \sum_{j=1}^m \exp\left(-\frac{\Delta E_{\omega_i}[A_j]}{k_B T}\right) \quad (\text{S41})$$

$E_{\omega_i}[A_j]$  – energy calculated for  $j$ -th isomer within the  $\omega_i$  vibration at  $S_0$  state,

$E[A_0]$  - energy at the  $S_0$ -state optimized geometry.

At the end, contribution of the  $^3\text{CT}$ - $^1\text{CT}$  transition rate constant from each vibrational mode

$\mu_{3\text{CT}\rightarrow 1\text{CT}}^{\omega_i}$  to the total  $k_{3\text{CT}\rightarrow 1\text{CT}}$  was calculated (see **Table S18**) using:

$$\mu_{3\text{CT}\rightarrow 1\text{CT}}^{\omega_i} = \frac{k_{3\text{CT}\rightarrow 1\text{CT}}^{\omega_i}}{\sum_{i=1}^{n=8} k_{3\text{CT}\rightarrow 1\text{CT}}^{\omega_i}}. \quad (\text{S42})$$

As an example, below we present a complete set of computed parameters for the prediction of the  $^3\text{CT}\text{-}^1\text{CT}$  transition rate constant within the first vibrational mode ( $k_{3\text{CT}\rightarrow 1\text{CT}}^{\omega_1}$ ) in **H**, **diCl** and **diBr** (**Tables S15 – S17** and **Figures S20 – S24**).

**Table S15.** Computational parameters for the prediction of  $k_{3CT \rightarrow 1CT}^{\omega_1}$  in **H**.

| Computational parameters for prediction $k_{3CT \rightarrow 1CT}^{\omega_1}$ in <b>H</b> |                            |                     |                           |                                |                                      |                                    |                                             |
|------------------------------------------------------------------------------------------|----------------------------|---------------------|---------------------------|--------------------------------|--------------------------------------|------------------------------------|---------------------------------------------|
| $A_j$                                                                                    | $\Delta E_{\omega_1}[A_j]$ | $p_{\omega_1}[A_j]$ | $\Delta E_{3CT-1CT}[A_j]$ | $V_{3CT \rightarrow 1CT}[A_j]$ | $\lambda_{3CT \rightarrow 1CT}[A_j]$ | $k_{\omega_1}[A_j]$                | $k_{\omega_1}[A_j] \cdot p_{\omega_1}[A_j]$ |
|                                                                                          | [eV]                       | [%]                 | [meV]                     | [cm <sup>-1</sup> ]            | [meV]                                | 10 <sup>4</sup> [s <sup>-1</sup> ] | 10 <sup>4</sup> [s <sup>-1</sup> ]          |
| -2.00                                                                                    | 0.0814                     | 0.23                | 11.46                     | 0.044                          | 136.23                               | 0.844                              | 0.0019                                      |
| -1.80                                                                                    | 0.0624                     | 0.48                | 10.18                     | 0.040                          | 107.72                               | 1.041                              | 0.0049                                      |
| -1.50                                                                                    | 0.0401                     | 1.14                | 8.46                      | 0.033                          | 72.86                                | 1.276                              | 0.0146                                      |
| -1.40                                                                                    | 0.0339                     | 1.45                | 7.95                      | 0.031                          | 63.15                                | 1.325                              | 0.0192                                      |
| -1.20                                                                                    | 0.0236                     | 2.16                | 7.05                      | 0.026                          | 46.37                                | 1.360                              | 0.0294                                      |
| -1.00                                                                                    | 0.0155                     | 2.96                | 6.23                      | 0.022                          | 32.71                                | 1.301                              | 0.0386                                      |
| -0.80                                                                                    | 0.0094                     | 3.77                | 5.61                      | 0.018                          | 22.05                                | 1.126                              | 0.0429                                      |
| -0.50                                                                                    | 0.0032                     | 4.78                | 4.90                      | 0.011                          | 10.99                                | 0.707                              | 0.0337                                      |
| -0.40                                                                                    | 0.0019                     | 5.03                | 4.73                      | 0.009                          | 8.53                                 | 0.524                              | 0.0269                                      |
| -0.30                                                                                    | 0.0010                     | 5.22                | 4.57                      | 0.007                          | 6.62                                 | 0.340                              | 0.0178                                      |
| -0.25                                                                                    | 0.0006                     | 5.30                | 4.54                      | 0.006                          | 5.93                                 | 0.251                              | 0.0133                                      |
| -0.20                                                                                    | 0.0003                     | 5.35                | 4.46                      | 0.004                          | 5.30                                 | 0.171                              | 0.0091                                      |
| -0.15                                                                                    | 0.0001                     | 5.39                | 4.44                      | 0.003                          | 4.87                                 | 0.102                              | 0.0054                                      |
| -0.10                                                                                    | 0.0000                     | 5.42                | 4.44                      | 0.002                          | 4.61                                 | 0.045                              | 0.0025                                      |
| 0                                                                                        | 0.0000                     | 5.42                | 4.38                      | 0.000                          | 4.38                                 | 0.000                              | 0.0000                                      |
| 0.10                                                                                     | 0.0003                     | 5.35                | 4.41                      | 0.002                          | 4.77                                 | 0.045                              | 0.0025                                      |
| 0.15                                                                                     | 0.0006                     | 5.29                | 4.41                      | 0.003                          | 5.13                                 | 0.101                              | 0.0053                                      |
| 0.20                                                                                     | 0.0010                     | 5.22                | 4.44                      | 0.004                          | 5.66                                 | 0.162                              | 0.0088                                      |
| 0.25                                                                                     | 0.0014                     | 5.13                | 4.49                      | 0.006                          | 6.34                                 | 0.242                              | 0.0124                                      |
| 0.30                                                                                     | 0.0019                     | 5.03                | 4.49                      | 0.007                          | 7.07                                 | 0.332                              | 0.0165                                      |
| 0.40                                                                                     | 0.0032                     | 4.78                | 4.63                      | 0.009                          | 9.10                                 | 0.521                              | 0.0243                                      |
| 0.50                                                                                     | 0.0048                     | 4.49                | 4.76                      | 0.011                          | 11.65                                | 0.679                              | 0.0308                                      |
| 0.80                                                                                     | 0.0119                     | 3.41                | 5.41                      | 0.018                          | 22.78                                | 1.121                              | 0.0381                                      |
| 1.00                                                                                     | 0.0187                     | 2.62                | 6.04                      | 0.022                          | 33.34                                | 1.292                              | 0.0337                                      |
| 1.20                                                                                     | 0.0274                     | 1.86                | 6.78                      | 0.026                          | 46.48                                | 1.367                              | 0.0254                                      |
| 1.40                                                                                     | 0.0383                     | 1.22                | 7.65                      | 0.031                          | 62.56                                | 1.345                              | 0.0164                                      |
| 1.50                                                                                     | 0.0447                     | 0.95                | 8.14                      | 0.033                          | 71.79                                | 1.310                              | 0.0123                                      |
| 1.80                                                                                     | 0.0683                     | 0.38                | 9.82                      | 0.040                          | 104.75                               | 1.093                              | 0.0041                                      |
| 2.00                                                                                     | 0.0881                     | 0.18                | 11.13                     | 0.044                          | 131.62                               | 0.898                              | 0.0016                                      |

Fractional rate constant calculated for **H** within  $\omega_1$  vibration:  $k_{3CT \rightarrow 1CT}^{\omega_1} = \mathbf{0.4923}$

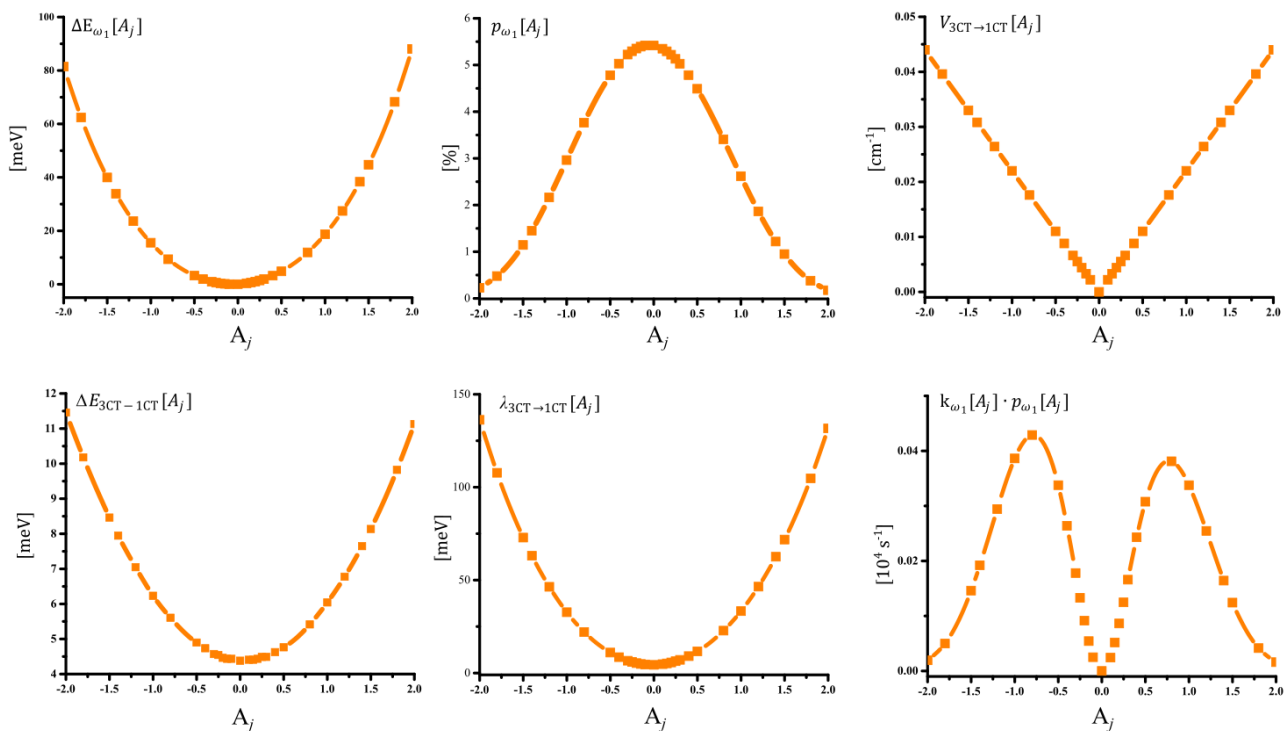**Figure S21.** Computational parameters for the prediction of  $k_{3CT \rightarrow 1CT}^{\omega_1}$  in **H**.

**Table S16.** Computational parameters for the prediction of  $k_{3CT \rightarrow 1CT}^{\omega_1}$  in **diCl**.

| Computational parameters for the prediction of $k_{3CT \rightarrow 1CT}^{\omega_1}$ in <b>diCl</b> |                            |                     |                                       |                                |                                      |                                    |                                             |
|----------------------------------------------------------------------------------------------------|----------------------------|---------------------|---------------------------------------|--------------------------------|--------------------------------------|------------------------------------|---------------------------------------------|
| $A_j$                                                                                              | $\Delta E_{\omega_1}[A_j]$ | $p_{\omega_1}[A_j]$ | $\Delta E_{3CT \rightarrow 1CT}[A_j]$ | $V_{3CT \rightarrow 1CT}[A_j]$ | $\lambda_{3CT \rightarrow 1CT}[A_j]$ | $k_{\omega_1}[A_j]$                | $k_{\omega_1}[A_j] \cdot p_{\omega_1}[A_j]$ |
|                                                                                                    | [eV]                       | [%]                 | [meV]                                 | [cm <sup>-1</sup> ]            | [meV]                                | 10 <sup>4</sup> [s <sup>-1</sup> ] | 10 <sup>4</sup> [s <sup>-1</sup> ]          |
| -2.00                                                                                              | 0.0778                     | 0.26                | 16.03                                 | 0.034                          | 118.61                               | 0.580                              | 0.0015                                      |
| -1.80                                                                                              | 0.0612                     | 0.51                | 14.01                                 | 0.031                          | 96.03                                | 0.677                              | 0.0033                                      |
| -1.50                                                                                              | 0.0408                     | 1.10                | 11.43                                 | 0.026                          | 67.65                                | 0.778                              | 0.0085                                      |
| -1.40                                                                                              | 0.0351                     | 1.37                | 10.64                                 | 0.024                          | 59.48                                | 0.795                              | 0.0109                                      |
| -1.20                                                                                              | 0.0252                     | 2.02                | 9.22                                  | 0.020                          | 44.52                                | 0.802                              | 0.0162                                      |
| -1.00                                                                                              | 0.0172                     | 2.76                | 8.05                                  | 0.017                          | 32.54                                | 0.748                              | 0.0206                                      |
| -0.80                                                                                              | 0.0108                     | 3.53                | 7.02                                  | 0.014                          | 22.75                                | 0.642                              | 0.0227                                      |
| -0.50                                                                                              | 0.0042                     | 4.57                | 5.82                                  | 0.009                          | 12.12                                | 0.389                              | 0.0177                                      |
| -0.40                                                                                              | 0.0026                     | 4.85                | 5.52                                  | 0.007                          | 9.63                                 | 0.286                              | 0.0138                                      |
| -0.30                                                                                              | 0.0015                     | 5.07                | 5.25                                  | 0.005                          | 7.63                                 | 0.184                              | 0.0093                                      |
| -0.25                                                                                              | 0.0010                     | 5.17                | 5.17                                  | 0.004                          | 6.87                                 | 0.134                              | 0.0070                                      |
| -0.20                                                                                              | 0.0006                     | 5.24                | 5.06                                  | 0.003                          | 6.18                                 | 0.092                              | 0.0048                                      |
| -0.15                                                                                              | 0.0004                     | 5.30                | 4.98                                  | 0.003                          | 5.66                                 | 0.054                              | 0.0028                                      |
| -0.10                                                                                              | 0.0002                     | 5.34                | 4.90                                  | 0.002                          | 5.22                                 | 0.025                              | 0.0013                                      |
| 0                                                                                                  | 0.0000                     | 5.38                | 4.79                                  | 0.000                          | 4.79                                 | 0.000                              | 0.0000                                      |
| 0.10                                                                                               | 0.0002                     | 5.35                | 4.71                                  | 0.002                          | 4.86                                 | 0.026                              | 0.0014                                      |
| 0.15                                                                                               | 0.0004                     | 5.31                | 4.70                                  | 0.003                          | 5.11                                 | 0.058                              | 0.0031                                      |
| 0.20                                                                                               | 0.0006                     | 5.25                | 4.70                                  | 0.003                          | 5.44                                 | 0.098                              | 0.0052                                      |
| 0.25                                                                                               | 0.0009                     | 5.18                | 4.76                                  | 0.004                          | 5.97                                 | 0.148                              | 0.0077                                      |
| 0.30                                                                                               | 0.0014                     | 5.09                | 4.76                                  | 0.005                          | 6.59                                 | 0.201                              | 0.0103                                      |
| 0.40                                                                                               | 0.0025                     | 4.87                | 4.78                                  | 0.007                          | 8.22                                 | 0.319                              | 0.0155                                      |
| 0.50                                                                                               | 0.0043                     | 4.61                | 4.91                                  | 0.009                          | 10.37                                | 0.436                              | 0.0200                                      |
| 0.80                                                                                               | 0.0105                     | 3.58                | 5.52                                  | 0.014                          | 20.22                                | 0.724                              | 0.0258                                      |
| 1.00                                                                                               | 0.0167                     | 2.81                | 6.18                                  | 0.017                          | 29.70                                | 0.841                              | 0.0236                                      |
| 1.20                                                                                               | 0.0245                     | 2.08                | 7.02                                  | 0.020                          | 41.67                                | 0.896                              | 0.0186                                      |
| 1.40                                                                                               | 0.0340                     | 1.43                | 8.05                                  | 0.024                          | 56.28                                | 0.893                              | 0.0127                                      |
| 1.50                                                                                               | 0.0395                     | 1.15                | 8.63                                  | 0.026                          | 64.59                                | 0.876                              | 0.0100                                      |
| 1.80                                                                                               | 0.0592                     | 0.54                | 10.67                                 | 0.031                          | 94.11                                | 0.754                              | 0.0040                                      |
| 2.00                                                                                               | 0.0753                     | 0.29                | 12.23                                 | 0.034                          | 117.74                               | 0.638                              | 0.0018                                      |

Fractional rate constant calculated for **diCl** within  $\omega_1$  vibration:  $k_{3CT \rightarrow 1CT}^{\omega_1}$  = **0.3012**

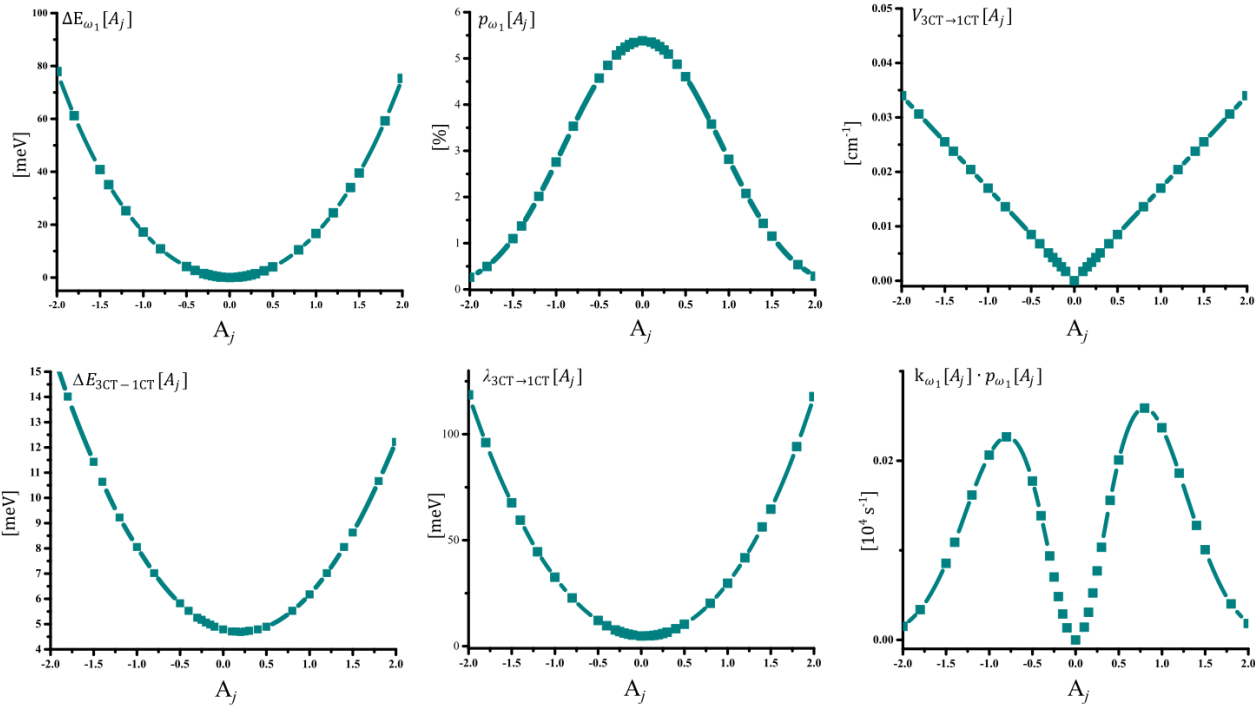

**Figure S22.** Computational parameters for the prediction of  $k_{3CT \rightarrow 1CT}^{\omega_1}$  in **diCl**.

**Table S17.** Computational parameters for the prediction of  $k_{3CT \rightarrow 1CT}^{\omega_1}$  in **diBr**.

| Computational parameters for the prediction of $k_{3CT \rightarrow 1CT}^{\omega_1}$ in <b>diBr</b> |                            |                     |                                       |                                |                                      |                                    |                                             |
|----------------------------------------------------------------------------------------------------|----------------------------|---------------------|---------------------------------------|--------------------------------|--------------------------------------|------------------------------------|---------------------------------------------|
| $A_j$                                                                                              | $\Delta E_{\omega_1}[A_j]$ | $p_{\omega_1}[A_j]$ | $\Delta E_{3CT \rightarrow 1CT}[A_j]$ | $V_{3CT \rightarrow 1CT}[A_j]$ | $\lambda_{3CT \rightarrow 1CT}[A_j]$ | $k_{\omega_1}[A_j]$                | $k_{\omega_1}[A_j] \cdot p_{\omega_1}[A_j]$ |
|                                                                                                    | [eV]                       | [%]                 | [meV]                                 | [cm <sup>-1</sup> ]            | [meV]                                | 10 <sup>4</sup> [s <sup>-1</sup> ] | 10 <sup>4</sup> [s <sup>-1</sup> ]          |
| -2.00                                                                                              | 0.0842                     | 0.21                | 12.54                                 | 0.028                          | 91.31                                | 0.628                              | 0.0013                                      |
| -1.80                                                                                              | 0.0659                     | 0.43                | 11.16                                 | 0.025                          | 73.74                                | 0.691                              | 0.0030                                      |
| -1.50                                                                                              | 0.0435                     | 1.02                | 9.33                                  | 0.021                          | 51.98                                | 0.732                              | 0.0075                                      |
| -1.40                                                                                              | 0.0373                     | 1.30                | 8.79                                  | 0.020                          | 45.84                                | 0.728                              | 0.0095                                      |
| -1.20                                                                                              | 0.0265                     | 1.97                | 7.81                                  | 0.017                          | 35.07                                | 0.692                              | 0.0137                                      |
| -1.00                                                                                              | 0.0178                     | 2.77                | 6.97                                  | 0.014                          | 26.19                                | 0.616                              | 0.0171                                      |
| -0.80                                                                                              | 0.0110                     | 3.61                | 6.23                                  | 0.011                          | 17.88                                | 0.523                              | 0.0189                                      |
| -0.50                                                                                              | 0.0040                     | 4.75                | 5.41                                  | 0.007                          | 10.17                                | 0.295                              | 0.0140                                      |
| -0.40                                                                                              | 0.0024                     | 5.04                | 5.17                                  | 0.006                          | 8.31                                 | 0.213                              | 0.0107                                      |
| -0.30                                                                                              | 0.0013                     | 5.28                | 5.01                                  | 0.004                          | 6.88                                 | 0.133                              | 0.0070                                      |
| -0.25                                                                                              | 0.0008                     | 5.37                | 4.90                                  | 0.004                          | 6.25                                 | 0.098                              | 0.0052                                      |
| -0.20                                                                                              | 0.0005                     | 5.44                | 4.84                                  | 0.003                          | 5.76                                 | 0.065                              | 0.0036                                      |
| -0.15                                                                                              | 0.0002                     | 5.49                | 4.79                                  | 0.002                          | 5.37                                 | 0.038                              | 0.0021                                      |
| -0.10                                                                                              | 0.0001                     | 5.53                | 4.73                                  | 0.001                          | 5.04                                 | 0.018                              | 0.0010                                      |
| 0                                                                                                  | 0.0000                     | 5.54                | 4.63                                  | 0.000                          | 4.63                                 | 0.000                              | 0.0000                                      |
| 0.10                                                                                               | 0.0002                     | 5.49                | 4.53                                  | 0.001                          | 4.61                                 | 0.018                              | 0.0010                                      |
| 0.15                                                                                               | 0.0005                     | 5.41                | 4.53                                  | 0.002                          | 4.70                                 | 0.041                              | 0.0022                                      |
| 0.20                                                                                               | 0.0010                     | 5.33                | 4.54                                  | 0.003                          | 4.93                                 | 0.072                              | 0.0038                                      |
| 0.25                                                                                               | 0.0015                     | 5.23                | 4.55                                  | 0.004                          | 5.24                                 | 0.108                              | 0.0057                                      |
| 0.30                                                                                               | 0.0020                     | 5.12                | 4.57                                  | 0.004                          | 5.62                                 | 0.151                              | 0.0077                                      |
| 0.40                                                                                               | 0.0034                     | 4.85                | 4.65                                  | 0.006                          | 6.66                                 | 0.245                              | 0.0119                                      |
| 0.50                                                                                               | 0.0052                     | 4.52                | 5.03                                  | 0.007                          | 8.11                                 | 0.342                              | 0.0155                                      |
| 0.80                                                                                               | 0.0129                     | 3.35                | 5.44                                  | 0.011                          | 14.72                                | 0.611                              | 0.0205                                      |
| 1.00                                                                                               | 0.0201                     | 2.53                | 5.99                                  | 0.014                          | 21.20                                | 0.744                              | 0.0188                                      |
| 1.20                                                                                               | 0.0291                     | 1.78                | 6.33                                  | 0.017                          | 29.49                                | 0.830                              | 0.0148                                      |
| 1.40                                                                                               | 0.0401                     | 1.16                | 6.67                                  | 0.020                          | 39.74                                | 0.870                              | 0.0101                                      |
| 1.50                                                                                               | 0.0464                     | 0.91                | 7.05                                  | 0.021                          | 45.65                                | 0.874                              | 0.0079                                      |
| 1.80                                                                                               | 0.0689                     | 0.38                | 8.44                                  | 0.025                          | 67.93                                | 0.808                              | 0.0031                                      |
| 2.00                                                                                               | 0.0871                     | 0.19                | 9.47                                  | 0.028                          | 85.18                                | 0.738                              | 0.0014                                      |

Fractional rate constant calculated for **diBr** within  $\omega_1$  vibration:  $k_{3CT \rightarrow 1CT}^{\omega_1} = \mathbf{0.2381}$

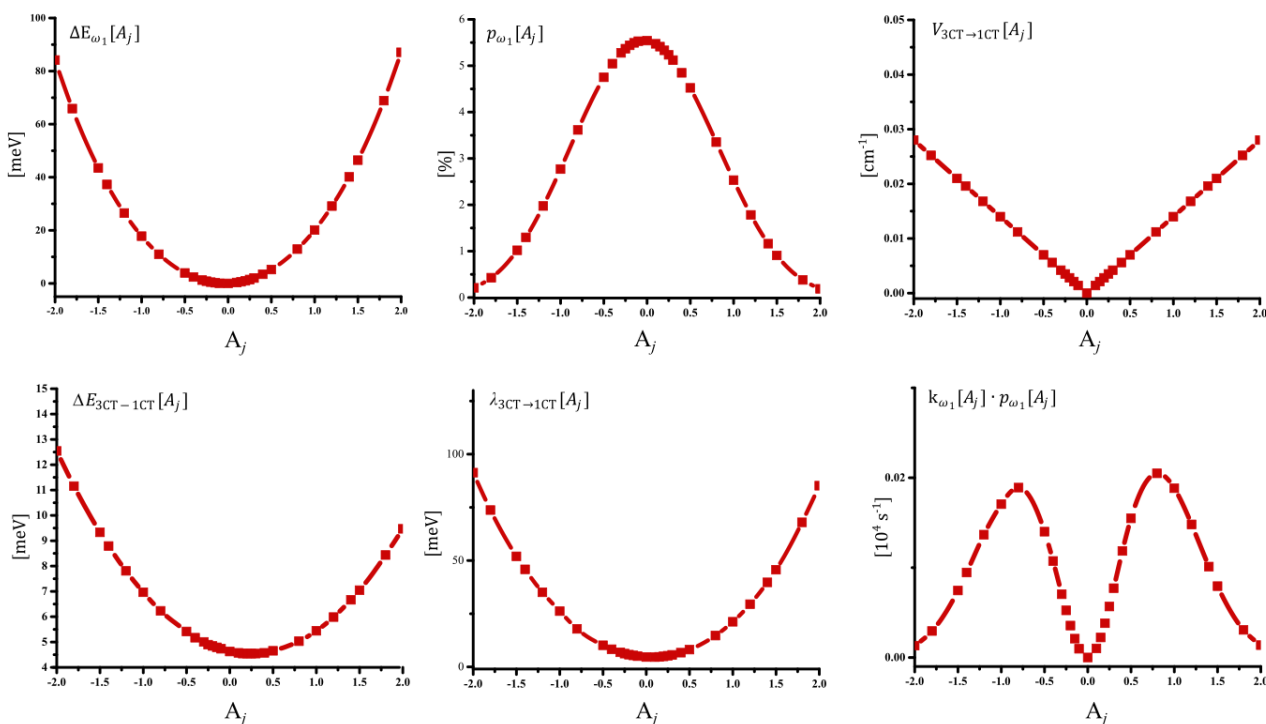**Figure S23.** Computational parameters for the prediction of  $k_{3CT \rightarrow 1CT}^{\omega_1}$  in **diBr**.

**Table S18.** Computed fractional rate constant within vibrational model via direct  ${}^3\text{CT}\text{-}{}^1\text{CT}$  transition.

| <i>i</i> | Fractional constant rates                                                 |               |               | Contribution of each mode to total $k_{3\text{CT}\rightarrow 1\text{CT}}$ |      |      |
|----------|---------------------------------------------------------------------------|---------------|---------------|---------------------------------------------------------------------------|------|------|
|          | $k_{3\text{CT}\rightarrow 1\text{CT}}^{\omega_i} [10^4 \text{ s}^{-1}]^a$ |               |               | $\mu_{3\text{CT}\rightarrow 1\text{CT}}^{\omega_i} [\%]^b$                |      |      |
|          | H                                                                         | diCl          | diBr          | H                                                                         | diCl | diBr |
| 1        | 0.4923                                                                    | 0.3012        | 0.2381        | 87.3                                                                      | 57.7 | 21.6 |
| 2        | 0.0004                                                                    | 0.0042        | 0.0105        | 0.1                                                                       | 0.8  | 1.0  |
| 3        | 0.0032                                                                    | 0.0771        | 0.0038        | 0.6                                                                       | 14.7 | 0.3  |
| 4        | 0.0104                                                                    | 0.0259        | 0.2078        | 1.8                                                                       | 4.9  | 18.8 |
| 5        | 0.0004                                                                    | 0.0507        | 0.0528        | 0.1                                                                       | 9.7  | 4.8  |
| 6        | 0.0007                                                                    | 0.0041        | 0.0287        | 0.1                                                                       | 0.8  | 2.6  |
| 7        | 0.0025                                                                    | 0.0058        | 0.0216        | 0.4                                                                       | 1.1  | 2.0  |
| 8        | 0.0542                                                                    | 0.0535        | 0.5403        | 9.6                                                                       | 10.2 | 49.0 |
| <hr/>    |                                                                           |               |               |                                                                           |      |      |
|          | $k_{3\text{CT}\rightarrow 1\text{CT}} [10^4 \text{ s}^{-1}]^c$            | <b>0.5641</b> | <b>0.5236</b> | <b>1.1036</b>                                                             |      |      |

<sup>a</sup> – calculated using equation (S34);<sup>b</sup> – calculated using equation (S42);<sup>c</sup> – calculated using equation (S33).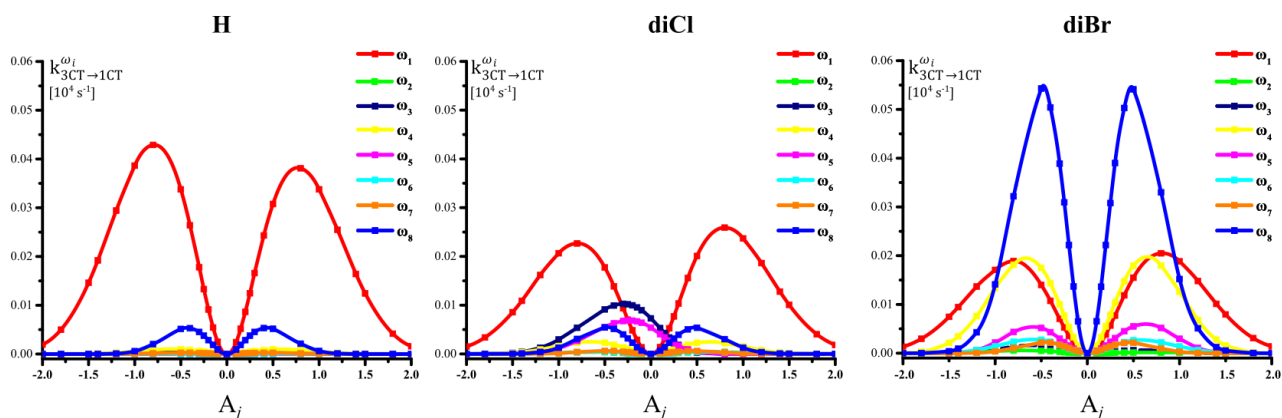**Figure S24.** Computed fractional rates  $k_{3\text{CT}\rightarrow 1\text{CT}}^{\omega_i}$  for various vibrational modes.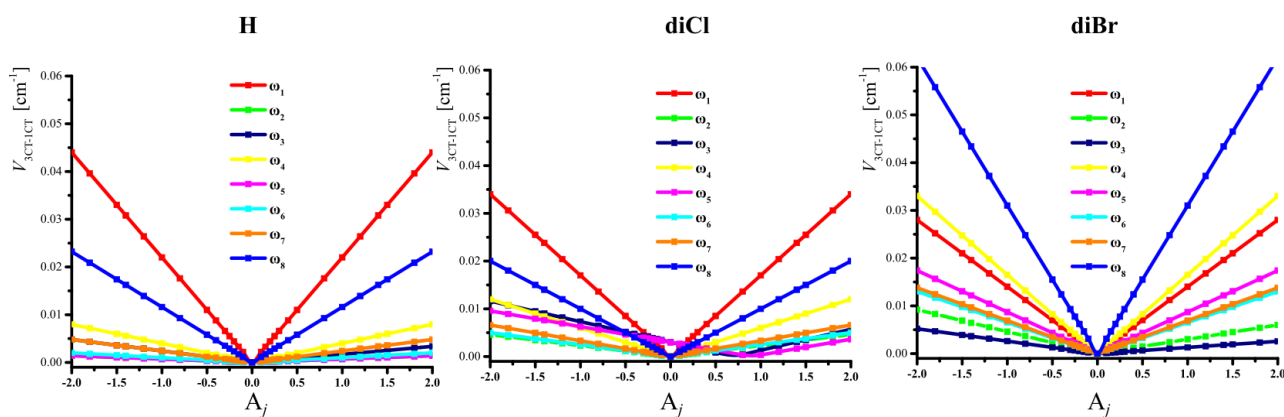**Figure S25** Computed SOC dependences on amplitudes  $A_j$  of various vibrational modes.

## Section S8: The assumptions towards rotational-vibronic model of direct $^3\text{CT}$ - $^1\text{CT}$ transition

Analysis of the results obtained by rotational and vibronic models can lead to the following conclusions. The rotational model describes SOC enhancement of the  $^3\text{CT}$ - $^1\text{CT}$  transition thanks to the specific molecular rotations – deviations of the  $\theta$  dihedral angle. Such a model thus reflects the structural diversity of emitter in macroscopic condensed medium and takes into account only most important conformations –  $\theta$ -rotamers. The rotational model seems to be optimal solution for the description of photophysics of light-atom emitters with orthogonal structure.

The presented vibronic model describes further SOC enhancement of the  $^3\text{CT}$ - $^1\text{CT}$  transition in selected emitter molecule ( $\theta$ -rotamer) thanks to the low-energy molecular vibrations. Analysis of the effect of relatively low-amplitude atomic movements on the electronic structure provides fine prediction of SOC, energy gaps and finally spin-flip rate constants.

Obviously, complete TADF model should combine such rotational and vibronic models. For all  $\theta$ -rotamers existing at room temperature, the effect of molecular vibrations on the electronic structure should be analyzed quantitatively. This task is, however, extremely time-consuming and computationally expensive.

To approximate such a rotational-vibronic model, we assumed that vibrational SOC enhancement in the  $90^\circ$ -rotamer is similar to that in other  $\theta$ -rotamers. To estimate the value of such enhancement, relative contribution of transition via the  $\omega_1$  rotational channel versus all vibrational channels was used:  $\mu_{^3\text{CT} \rightarrow ^1\text{CT}}^{\omega_1} = \frac{k_{^3\text{CT} \rightarrow ^1\text{CT}}^{\omega_1}}{\sum_{i=1}^n k_{^3\text{CT} \rightarrow ^1\text{CT}}^{\omega_i}}$ , calculated for the  $90^\circ$ -rotamers of **H**, **diCl**, and **diBr** (**Table S18**). The statistical sum of  $k_{^3\text{CT} \rightarrow ^1\text{CT}}$  obtained from rotational model (**Tables S15-S17**) was divided by the  $\mu_{^3\text{CT} \rightarrow ^1\text{CT}}^{\omega_1}$  giving rotational-vibronic values of  $k_{^3\text{CT} \rightarrow ^1\text{CT}}$  presented in **Table S19**. Such values showed the best correlation with the experimental rISC rate constants confirming the correctness of the above mentioned assumptions.

**Table S19.** Summary of developed theoretical models and comparasion with experimental results.

|             | Experimental <sup>a</sup> $k_{\text{rISC}}$ [ $10^4 \text{ s}^{-1}$ ] |      | Theoretical models $k_{3\text{CT} \rightarrow 1\text{CT}}$ [ $10^4 \text{ s}^{-1}$ ] |                            |                       |
|-------------|-----------------------------------------------------------------------|------|--------------------------------------------------------------------------------------|----------------------------|-----------------------|
|             | ZNX                                                                   | PMMA | “Rotational” <sup>b</sup>                                                            | “Vibrational” <sup>c</sup> | “Rotational-vibronic” |
| <b>H</b>    | 1.03                                                                  | 2.92 | 2.81                                                                                 | 0.56                       | 3.22                  |
| <b>diCl</b> | 0.87                                                                  | 1.85 | 1.75                                                                                 | 0.52                       | 3.07                  |
| <b>diBr</b> | 1.74                                                                  | 8.23 | 1.09                                                                                 | 1.10                       | 5.05                  |

<sup>a</sup> - experimental determination of rate constant described in **Section S3: Determination of photophysical parameters**;

<sup>b</sup> - prediction of rate constant within “rotational” model described in **Section S6: Computational details for prediction rISC rate constant within rotational model via direct <sup>3</sup>CT-<sup>1</sup>CT transition**;

<sup>c</sup> - prediction of rate constant within “vibrational” model described in **Section S7: Computational details for the prediction of rISC rate constant within rotational model via direct <sup>3</sup>CT-<sup>1</sup>CT transition**.

## Section S9: Molecular electronic orbitals

Molecular orbitals involved in the formation of key excited electronic states are presented below.

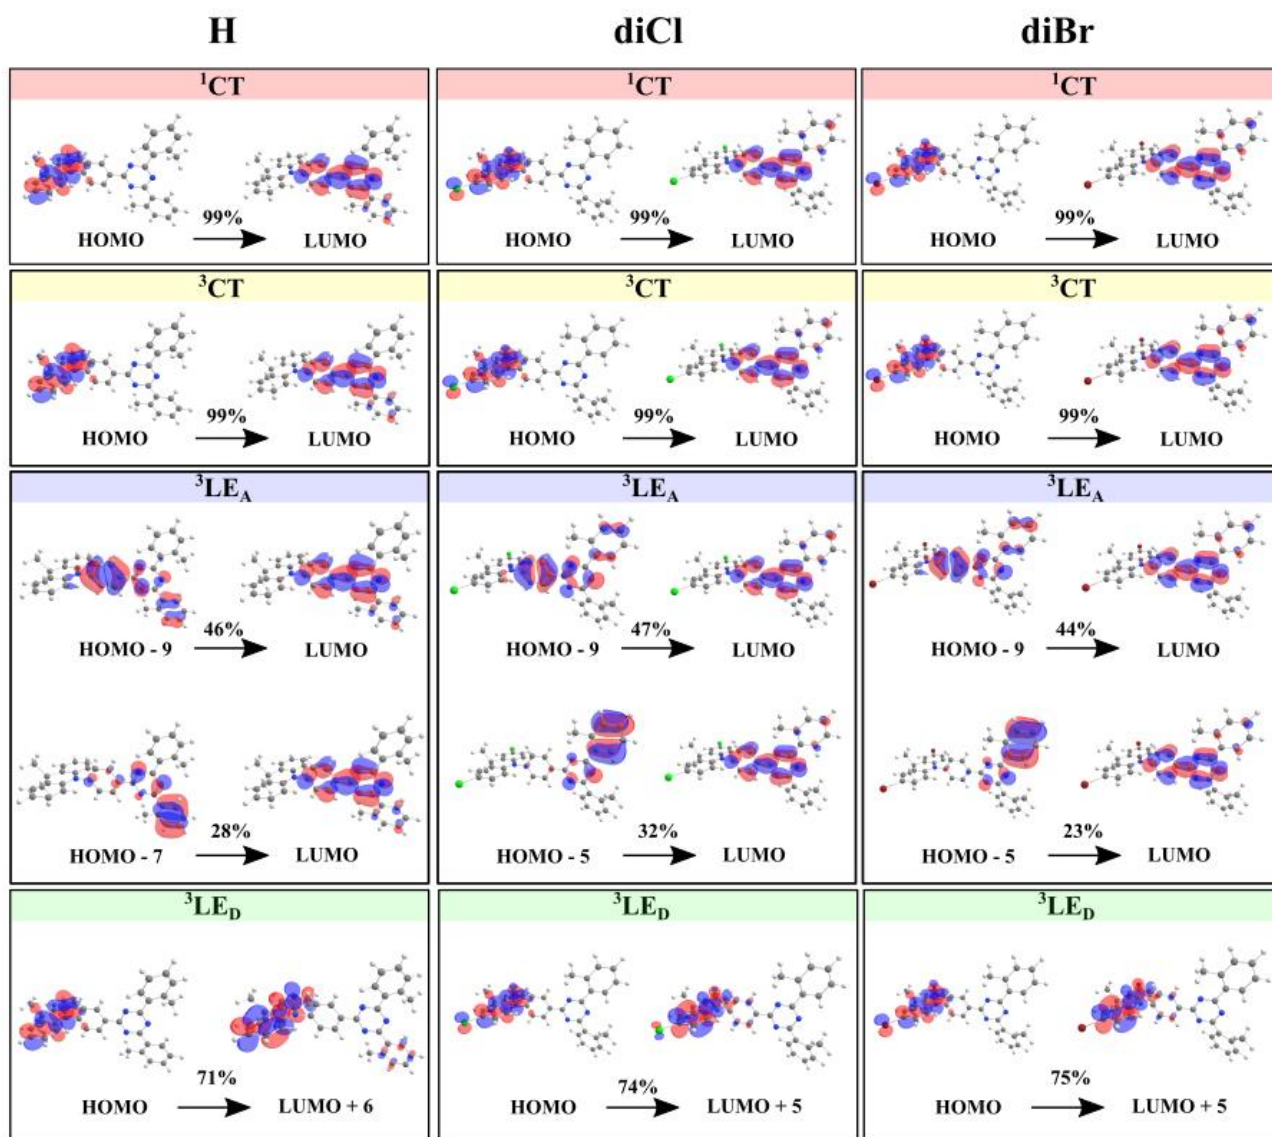

**Figure S26.** Computed MOs

As can be seen from the respective MO, the  $^1\text{CT}$  and  $^3\text{CT}$  states are formed via electron density transfer from DMAC donor to aryl-s-triazine acceptor. The  $^3\text{LE}_\text{A}$  state is formed due to redistribution of electronic density within the acceptor fragment. The  $^3\text{LED}$  state is formed due to redistribution of electronic density within the donor fragment. These data support the conclusions made on the basis of spectral analysis in main text and page S4-S5.

## REFERENCES

- [S1] Dias, F. B.; Penfold, T. J.; Monkman, A. P. Photophysics of thermally activated delayed fluorescence molecules. *Methods Appl. Fluoresc.* **2017**, 5, 012001.
- [S2] Stavrou, K.; Franca L. G.; Monkman, A. P. Photophysics of TADF Guest-Host Systems: Introducing the Idea of Hosting Potential. *ASC Appl. Electron. Mater.* **2020**, 2, 2868 – 2881.
- [S3] Serdiuk, I. E.; Mońka, M.; Kozakiewicz, K.; Liberek, B.; Bojarski, P.; Park, S. Y. Vibrationally Assisted Direct Intersystem Crossing between the Same Charge-Transfer States for Thermally Activated Delayed Fluorescence: Analysis by Marcus-Hush Theory Including Reorganization Energy. *J. Phys Chem. B* **2021**, 125, 2696 – 2706.
- [S4] Tao, Y.; Yuan, K.; Chen, T.; Xu, P.; Li, H.; Chen, R.; Zheng, C.; Zhang, L.; Huang, W. Thermally Activated Delayed Fluorescence Materials Towards the Breakthrough of Organoelectronics. *Adv. Mater.* **2015**, 26, 7931 – 7958.
- [S5] IUPAC. Compendium of Chemical Terminology, 2nd ed. (the "Gold Book"). Compiled by A. D. McNaught and A. Wilkinson. Blackwell Scientific Publications, Oxford (1997). Online version (2019-) created by S. J. Chalk. ISBN 0-9678550-9-8. <https://doi.org/10.1351/goldbook>.
